# Supplementary material for: Whole Genome Scan Reveals Molecular Signatures of Divergence and Selection Related to Important Traits in Durum Wheat Germplasm
Source: Front Genet. 2020 Apr 21;11:217. doi: 10.3389/fgene.2020.00217 (PMC7187681; doi:10.3389/fgene.2020.00217)
Supplement: Supplementary file 1 [file Data_Sheet_1.xlsx]

## Sheet: Table_S1
Table S1 List of the 259 tetraploid wheat cultivars analyzed by 3,541 SNP markers. From left to right we reported for each accession genetic group a priori defined (LR = landrace; OC = old cultivar, MC = modern cultivar), year of release, germplasm seed bank, geographical origin, pedigree and STRUCTURE cluster membership at K = 3, K = 5 and K = 16. In bold the 41 accessions selected for LR and MC…
Genotype	Group	Year of release	Seed source	Geographical origin	Pedigree	Structure
						K=3	K=5	K=16
Bianco	LR	NA	VIR	Italy, Sardinia		P1	P1a	Admx
Biancolilla	LR	NA	UNIPA	Italy, Sicily		P1	P1a	G2
Biancuccia.UP	LR	NA	UNIPA	Italy, Sicily		P1	P1a	Admx
Biancuccia.V	LR	NA	VIR	Italy, Sicily		P1	P1a	G2
Bidi.DV	LR	NA	CREA	Italy, Sicily		P1	P1a	Admx
Bidi.UP	LR	NA	UNIPA	Italy, Sicily		P2	P2a	G8
Bidi.V	LR	NA	VIR	Italy, Sicily		P2	P2a	G8
Bufala nera	LR	NA	UNIPA	Italy, Sicily		P1	P1a	G6
Bufala nera corta	LR	NA	CREA	Italy, Sicily		P1	P1a	G6
Bufala nera lunga	LR	NA	CREA	Italy, Sicily		P1	P1a	G6
Bufala rossa	LR	NA	UNIPA	Italy, Sicily		P1	P1a	Admx
Calbigia	LR	NA	VIR	Italy, Sardinia		P1	P1a	Admx
Biancuccia	LR	NA	CREA	Italy, Sicily		Admx	Admx	Admx
Cannizzara	LR	NA	VIR	Italy, Sicily		P1	P1a	Admx
Canu Bascia	LR	NA	VIR	Italy, Sardinia		P1	Admx	Admx
Capinera 179	LR	NA	VIR	Italy, Apulia		P1	P1a	Admx
Carlantino	LR	NA	VIR	Italy, Apulia		P1	P1a	G2
Castel Sardo Siciliano	LR	NA	VIR	Italy, Sardinia		Admx	P2a	Admx
Castiglione Glabro	LR	NA	VIR	Italy, Sicily		P1	P1a	G2
Castiglione Pubescente	LR	NA	VIR	Italy, Sicily		P1	P1a	Admx
Ceimilia	LR	NA	VIR	Italy, Sicily		P1	Admx	Admx
Ciciredda	LR	NA	CREA	Italy, Sicily		P1	P1a	G6
Cotrone	LR	NA	VIR	Italy, Sicily		P1	P1a	G1
Decimomanna	LR	NA	VIR	Italy, Sardinia		P2	P2a	Admx
Duro De Naples	LR	NA	USDA	Italy		P2	P2a	G8
Saragolla	LR	NA	CREA	Italy, Apulia		P1	Admx	Admx
Etrusco.DV	LR	NA	USDA	Italy		P1	P2a	G4
Farro Lungo	LR	NA	CNR	Italy, Sicily		P1	P2a	G4
Farro Corto	LR	NA	VIR	Italy, Sicily		P2	P2a	G8
Gigante	LR	NA	UNIPA	Italy		P1	P1a	G2
Gioia	LR	NA	VIR	Italy		P1	P1a	G1
Giustalisa	LR	NA	VIR	Italy		P1	P1a	G2
Grano ricco 8764	LR	NA	CNR	Italy, Apulia		P1	P1a	G1
Inglesa	LR	NA	VIR	Italy, Sicily		P1	P1a	Admx
Jeanh Rhetifha	LR	NA	CREA	North Africa, Tunisia		P1	Admx	Admx
Jenah Kottifa	LR	NA	CREA	North Africa, Tunisia		P1	Admx	Admx
Khorasan	LR	NA	CREA	T. turanicum		P1	P2a	G4
Khorasan-DV	LR	NA	CREA	T. turanicum		P1	P2a	G4
Madonie	LR	NA	UNIPA	Italy, Sicily		P1	P1a	G2
Manto di Maria	LR	NA	UNIPA	Italy, Sicily		P1	P1a	Admx
Margherito.UP	LR	NA	UNIPA	Italy, Sicily		P2	P2a	G8
Margherito.V	LR	NA	VIR	Italy, Sicily		P2	P2a	G8
Martinella	LR	NA	VIR	Italy, Sicily		P1	P1a	G2
Marzellina Saccone	LR	NA	CREA	Italy, Apulia		P1	P1b	G3
Murru	LR	NA	VIR	Italy, Sardinia		P1	P1a	Admx
Murru Bascum	LR	NA	VIR	Italy, Sardinia		P1	Admx	Admx
Pavone	LR	NA	VIR	Italy, Sicily		P1	P1a	G1
Perciasacchi	LR	NA	UNIPA	Italy, Sicily		P1	P2a	G4
Precioza	LR	NA	VIR	Italy, Sicily		P1	P1a	G1
Quattrocoste Razza 148	LR	NA	VIR	Italy	var. leucurum (ALEF.) KOERN.	P1	P1a	G2
Realforte	LR	NA	VIR	Italy, Sicily		P1	P1a	G1
Roseta	LR	NA	CREA	Italy, Sicily		P1	P1a	G2
Rossia	LR	NA	CREA	Italy		P1	P1a	Admx
Rosso	LR	NA	VIR	Italy, Sardinia		P1	P1a	Admx
Ruscia	LR	NA	VIR	Italy, Sicily		P1	Admx	Admx
Russello.9 dup	LR	NA	UNIPA	Italy, Sicily		P1	P1a	G2
Russello.SV	LR	NA	CREA	Italy, Sicily		P1	P1a	G2
Russello.V	LR	NA	VIR	Italy, Sicily		P2	Admx	G9
Russello 1	LR	NA	UNIPA	Italy, Sicily		P1	P1a	Admx
Russello 2	LR	NA	UNIPA	Italy, Sicily		P1	P1a	G2
Russello 3	LR	NA	UNIPA	Italy, Sicily		Admx	P2a	G8
Russello 4	LR	NA	UNIPA	Italy, Sicily		P1	P1a	G2
Russello 5	LR	NA	UNIPA	Italy, Sicily		P1	Admx	Admx
Russello.BC	LR	NA	CREA	Italy, Sicily		P1	P1a	G2
S Pasquale 1302	LR	NA	CNR	Italy, Apulia		P2	Admx	G9
Saragolla.V	LR	NA	VIR	Italy, Apulia		P1	P1a	G1
Saragolla Zingaresca	LR	NA	VIR	Italy, Apulia		P2	P2a	Admx
Scorsonera.SV	LR	NA	CREA	Italy, Sicily		P1	P1a	Admx
Scorsonera.UP	LR	NA	UNIPA	Italy, Sicily		P1	P1a	Admx
Scorsonera.V	LR	NA	VIR	Italy, Sicily		P1	P1a	G2
Sicilia	LR	NA	UNIPA	Italy, Sicily		P1	P1a	Admx
Taganrog.V	LR	NA	VIR	Russia		P1	P1a	G2
Taganrog.CREA	LR	NA	CREA	Russia		P2	P2a	G8
Timilia.V	LR	NA	VIR	Italy, Sicily		P1	P1b	G3
Timilia 1	LR	NA	UNIPA	Italy, Sicily		P1	P1b	G3
Timilia 2	LR	NA	UNIPA	Italy, Sicily		P1	P1b	G3
Timilia 3	LR	NA	UNIPA	Italy, Sicily		P1	P1b	G3
Timilia 4	LR	NA	UNIPA	Italy, Sicily		P1	P1b	G3
Timilia 5	LR	NA	UNIPA	Italy, Sicily		P1	P1b	G3
Timilia 6	LR	NA	UNIPA	Italy, Sicily		P1	P1b	G3
Timilia 7	LR	NA	UNIPA	Italy, Sicily		P1	P1b	G3
Timilia.CREA	LR	NA	CREA	Italy, Sicily		P1	P1b	G3
Trigu Canu	LR	NA	VIR	Italy, Sardinia		P1	Admx	Admx
Zingarello	LR	NA	VIR	Italy, Apulia		P1	P1a	Admx
Appulo	OC	1973	CREA		Cappelli/Grifoni//Capeiti-8	P2	Admx	G9
Aziziah-UP	OC	1925	UNIPA		Selected from exotic landraces “Near East”	P2	P2b	G10
Aziziah.V	OC	1925	VIR		Selected from exotic landraces “Near East”	Admx	P2a	G4
Aziziah 301	OC	1933	VIR	sicilia, puglia, basilicata	Selected from exotic landraces “Lybia”	P2	P1b	G7
Aziziah	OC	1925	CREA		Selected from exotic landraces “Near East”	Admx	P1b	G7
B 52	OC	1949	VIR		Cappelli/Triticum aestivum	P2	P1b	G7
Belfuggito	OC	1973	CREA		Conte Morando/3/ T. turgidum ssp dicoccoides /Duro Australiano// T. persicum var ekinatum/ Duro Australiano	P1	Admx	G5
Belsincap 8	OC	1961	VIR		BELONOPTERNS/SENATORE-CAPPELLI//L.51	Admx	Admx	Admx
Capeiti 8	OC	1940	CREA		Eiti 6/Cappelli	P2	Admx	G9
Cappelli.V	OC	1915	VIR		Strampelli selection from “Jean Retifah”	P2	P2a	G8
Cappelli.CREA	OC	1915	CREA		Strampelli selection from “Jean Retifah”	P2	P2a	G8
Cappelli.MP	OC	1915	CREA		Strampelli selection from “Jean Retifah”	P2	P2a	G8
Carlo Yucci	OC	1945	VIR		FORLANI(Tr.aestivum)/RUSSELLO	P1	P1a	Admx
Casale 92	OC	1962	VIR		AZIZIAH/SENATORE-CAPELLI	P2	Admx	Admx
Ciclope 66	OC	1966	VIR		SENATORE-CAPELLI/ABU-FASHI	P2	P2a	Admx
Dauno III.4879	OC	1914	CREA		Unknown	P1	P1a	G1
Dauno III CNR	OC	1914	CNR		Unknown	P1	P1a	G1
Dauno III CREA	OC	1914	CREA		Unknown	P1	P1a	G1
Dauno.UP	OC	1914	UNIPA		Unknown	P1	P1a	G1
Dauno.V	OC	1914	VIR		Unknown	P1	P1a	G1
Dauno III-UP	OC	1914	UNIPA		Unknown	P1	P1a	G1
Dauno III-V	OC	1914	VIR		Unknown	P1	P1a	G1
G. Miraglia	OC	1964	VIR		FORLANI (Tr. Aestivum) /ZERAMEK	P1	P1a	Admx
Garigliano	OC	1924	UNIPA		TRIPOLINO/CAPPELLI	P2	Admx	G8
Garigliano SV	OC	1924	CREA		TRIPOLINO/CAPPELLI	P2	Admx	Admx
Grifoni 235.UP	OC	1949	UNIPA		Cappelli/Triticum aestivum	P2	Admx	Admx
Grifoni 235.SV	OC	1949	CREA		Cappelli/Triticum aestivum	P2	P1b	Admx
Grifoni.V	OC	1949	VIR		Cappelli/Triticum aestivum	P1	P1a	G2
Grifoni 235.V	OC	1949	VIR		Cappelli/Triticum aestivum	P2	P1b	G7
Grifoni 235	OC	1949	CREA		Cappelli/Triticum aestivum	P2	Admx	Admx
Hymera	OC	1970	CREA		B-14/Capeiti-8	P2	Admx	G9
Kiperounda	OC	1956	CREA		Unknown	P1	Admx	Admx
Lambro	OC	1973	CREA		Conte Morando/3/ T. turgidum ssp dicoccoides /Duro Australiano// T. persicum var ekinatum/ Duro Australiano	P1	Admx	G5
Langdon	OC	1956	CREA	Yuma (T. turgidum ssp durum)/Stewart (T. turgidum ssp. durum)//Carleton	Yuma (T. turgidum ssp durum)/Stewart (T. turgidum ssp. durum)//Carleton	P3	P3	G11
S. Cappelli.UP	OC	1915	UNIPA		Strampelli selection from “Jean Retifah”	P2	P2a	G8
S. Cappelli-V	OC	1915	VIR		Strampelli selection from “Jean Retifah”	P2	P2a	G8
Sfinge	OC	NA	CREA	Italy, Apulia		P3	P3	G15
Timilia.SV	OC		CREA		De Cillis selection from “Timilia” population	P1	P1b	G3
Trinakria	OC	1970	CREA		B-14/Capeiti-8	P2	P2a	G9
Tripolino	OC		UNIPA		Strampelli selection from “North Africa” landrace	P2	P1b	G7
Vera 63	OC	1963	VIR	hordeiforme	EITI-6/RUSSELLO-S.G.7	P1	P1a	Admx
Achille	MC	2006	CREA	Italy	L.37/05 x AG - 4073	P3	P3	Admx
Adamello	MC	1985	CREA	Italy	Valforte/Turkis line 7112	P2	P2b	G10
Altar 84	MC	1984	CREA	Italy	Ruff/Flamingo, Mex//Mexicali 75/3/Shearwater	P3	P2b	G10
Ambral	MC	1994	CREA	France	D-76018/Valdur	P3	P3	Admx
Amedeo	MC	1987	CREA	Italy	Maristella/Capeiti	P2	Admx	G9
Ancomarzio	MC	2003	CREA	Mex	Stotka//Altar84/Ald	P3	P3	G12
Antalis	MC	2013	CREA	France	Unknown	P3	P3	G12
Antas	MC	1988	CREA	Italy	Barrigon-Yaqui-Enano/4/Tehuacan-60/3/Yaktana-54//Norin-10/Brevor/5/Tacur-Tipo-125//Tehuacan-60/Ichnusa	P2	Admx	Admx
Appio	MC	1982	CREA		Cappelli//Gaviota/Yuma	P3	P3	G14
Arcangelo	MC	1983	CREA	Italy	Creso/Appulo	P2	Admx	G16
Arcobaleno	MC	1995	CREA	Spain	Chen/Altar 84	Admx	Admx	G16
Ariosto	MC	2005	CREA	Italy	Karim/Baio	P3	P3	G15
Arnacoris	MC	2005	CREA	Italy	Unknown	P3	Admx	Admx
Athena	MC	1982	CREA		Ranieri (Tr. Aestivum)/Jucci	P3	P3	Admx
Aureo	MC	2009	CREA	Italy	Kofa/Svevo	P3	P3	Admx
Avispa	MC	2001	CREA	Italy	Unknown	P3	P3	G12
Baio	MC	1998	CREA	Italy	Duilio/F21//G76	P3	P3	Admx
Barcarol	MC	2000	CREA	France	Unknown	P3	P3	Admx
Berillo	MC	1981	CREA		Haynaldia villosa/3*Cappelli/5/Yakatana-54//Norin-10/Brevor/3/ST-464/6/2*Thatcher	P2	P2a	Admx
Bil 42	MC	2006	CREA	Italy	Breeding line derived from Latino/MG29896	P3	P3	G15
Brindur	MC	1987	CREA	France	Crosby/623//Edmore	P3	P3	G11
Bronte	MC	1996	CREA	Italy	BERILLO/LATINO	P3	P3	G15
Canyon	MC	2005	CREA	Italy	Unknown	P3	P3	Admx
Casanova	MC	2003	CREA	Italy	Flavio/Syene//Duilio	P3	P3	Admx
Castello	MC	1986	VIR	Italy	CIMMYT-9799/CAPEITI-8//ETHIOPIA-777	P2	P2b	G9
Casteldelmonte	MC	1977	CREA		Selection from Grifoni mutants	P2	P1b	G7
Ceedur	MC	1994	CREA	France	Mondur/2587.8.6//Edmore/Chandur	P1	P2a	G4
Cesare	MC	2010	CREA	Italy	Iride/D95241	P3	P3	G13
Chiara	MC	2003	CREA	Italy	Arcangelo/Fortore	P2	P2b	Admx
Ciccio	MC	1996	CREA	Italy	APPULO/VALNOVA//VALFORTE/PATRIZIO	P2	P2b	G9
Ciclope	MC	2006	CREA	Italy	Trinakria/Berillo//Valnova/Trinakria	P2	P2b	Admx
Cirillo	MC	1992	CREA	Italy	Jucci/Polesine//Creso/Montanari	P3	Admx	Admx
Claudio	MC	1998	CREA	Italy	CIMMYT's selection 35/Durango//IS1938/Grazia	P3	P3	G13
Colombo	MC	2010	CREA	Italy	Biensur/Nefer	P3	P3	Admx
Colosseo	MC	1995	CREA	Italy	CRESO/MEXA	P3	P3	G14
Core	MC	2008	CREA	Italy	Platani/Gianni	P3	P3	Admx
Cosmodur	MC	1992	CREA	France	Natural hybridization of D881 line	P3	P3	G11
Credit	MC	2009	CREA	Italy	Simeto/Arcobaleno//Simeto	P3	Admx	G12
Creso	MC	1974	CREA	Italy	Yaktana-54/Norin 10-B//2*Cappelli-63/3/3*Tehuacan-60/4/Capelli-B144	P2	P2b	G9
Doral	MC	1992	CREA	Italy	INRA-164-1-27/IDSN-45	P3	P3	G14
Duetto	MC	2002	CREA	Italy	1485/83.74	P3	P3	Admx
Duilio	MC	1984	CREA	Italy	CAPPELLI//ANHINGA/FLAMINGO	P3	P3	G15
Durfort	MC	1996	CREA	France	Selected from REVA population	P3	P3	Admx
Dylan	MC	2002	CREA	Italy	Neodur/Ulisse	P3	P3	G11
Emilio Lepido	MC	2011	CREA	Italy	Orobel//Arcobaleno/Svevo	P3	P3	G13
Enduro	MC	1991	CREA	Mex	GAVIOTA/TEHUACAN-60//MEXICALI-75	P3	P3	G14
Ettore	MC	2012	CREA	Italy	SELEZ.CIMMYT/DURANGO//IS1938/ RUSTICANO	P3	P3	G13
Exeldur	MC	1992	CREA	France	Valdur/Regal	P3	P3	G11
Fauno	MC	1992	CREA	Italy	Gediz-75/Flamingo, Mex//Teal, Mex	P3	P3	G14
Fenix	MC	1990	CREA	Italy	Madif/Durum Tunisian//Valgerardo	Admx	P2b	Admx
Fiore	MC	2001	CREA	Italy	SVANE-1/DUKEM-14	P3	P3	G12
Fortore	MC	1995	CREA	Italy	Capeiti-8/Valforte	P2	P2b	Admx
Furio Camillo	MC	2012	CREA	Italy	Iride/Claudio	P3	P3	G13
Gianni	MC	1992	CREA	Italy	Multiple cross among durum wheat cultivar	P3	P3	G15
Giotto	MC	1999	CREA	Italy	W.A 6518-2/GA547	P3	Admx	Admx
Granizio	MC	1992	CREA	Italy	Yel S/Shaw S	P3	P3	G12
Grazia	MC	1985	CREA	Italy	Leeds (M 6800127)/Valselva	P3	Admx	Admx
Grecale	MC	2002	CREA	Italy	S2/WB 881//Plinio/F22	P3	P3	Admx
Iride	MC	1996	CREA	Italy	ALTAR 84/ARES-SIB	P3	P3	G12
Isildur	MC	2007	CREA	France	NEFER/ACALOU//GA-7-B-14	P3	P3	Admx
Italo	MC	1993	CREA	Italy	Complex cross between Italian and Turkish genotypes	P3	P3	G14
K26	MC	2006	CREA	Italy	Spontaneuos mutant derived from Simeto/Colosseo	Admx	Admx	G16
Kanakis	MC	2008	CREA	France	Unknown	P3	P3	G12
Karel	MC	1979	CREA	Italy	Mx-198/Maristella	P3	P3	Admx
Kronos	MC	1993	CREA	USA	Male_Sterile_Facilitated_Recurrent_Selection_Population-APB-MSFRS-Pop	P3	P3	Admx
L2284	MC	2015	CREA	Italy	Unknown	P3	Admx	Admx
L2300-Natal	MC	2016	CREA	Italy	L976/SANCARLO	P3	P3	G13
L2443-Nadif	MC	2016	CREA	Italy	Claudio/Orobel	P3	P3	G13
Latino	MC	1982	CREA	Italy	Cappelli/Anhinga//T. turgidum	P3	P3	G15
Latinur	MC	2004	CREA	France	Unknown	P3	P3	Admx
Lesina	MC	1998	CREA	Italy	Capeiti/Creso//Creso//Trinakria/Valforte	P2	P2b	Admx
Lira	MC	1985	VIR	Italy	Mandon x FD 1104	P2	Admx	Admx
Lloyd	MC	1983	CREA	USA	Cando/Edmore	P3	P3	G11
Maestrale	MC	2004	CREA	Italy	Iride/Svevo	P3	P3	G15
Marakas	MC	2012	CREA	France	Unknown	P3	P3	G12
Marco Aurelio	MC	2010	CREA	Italy	Orobel//Arcobaleno/Svevo	P3	P3	G13
Martino	MC	1998	CREA	Italy	Appulo/Produra	P2	Admx	Admx
Massimo Meridio	MC	2010	CREA	Italy	Orobel//Arcobaleno/Svevo	P3	P3	G13
Meridiano	MC	1999	CREA	Italy	Simeto/WB 881/Duilio/F21	P3	P3	G15
Messapia	MC	1982	CREA	Italy	Mex/Crane (SIB)//Tito	P3	P3	G14
Mexicali 75	MC	1975	CREA	#N/A	Gerardo-VZ-469/3/Jori (SIB)//ND-61-130/Leeds	P2	P2b	Admx
Mida	MC	1975	CREA	#N/A	Yaktana-54/Norin 10-B//2*Cappelli-63/3/2*Tehuacan-60/4/Capelli-B144	Admx	Admx	G16
Monastir	MC	2009	CREA	France	Unknown	P3	P3	Admx
Nefer	MC	1996	CREA	France	164/Keops	P3	P3	G14
Neodur	MC	1987	CREA	France	184-7/Valdur//Edmore	P3	P3	G11
Neolatino	MC	2007	CREA	Italy	Latino/Trinakria//MG1433/4/Latino	P3	P3	G15
Normanno	MC	2002	CREA	Italy	Simeto/F22//L35	P3	Admx	Admx
Obelix	MC	2012	CREA	Italy	Unknown	P3	P3	Admx
Ofanto	MC	1990	CREA	Italy	Adamello/Appulo	P2	P2b	G10
Opera	MC	2013	CREA	Italy	Duilio/CIMMYT line	P3	P3	G12
Orfeo	MC	2004	CREA	Italy	Creso/Simeto	Admx	Admx	Admx
Orizzonte	MC	2011	CREA	Italy	Rusticano/Simeto	P3	P3	Admx
Orobel	MC	1999	CREA	Italy	COMPOSITE-INRA/GIE-BLE-DUR	P3	P3	G13
Ovidio	MC	2012	CREA	Italy	Svevo/Claudio	P3	P3	G13
Parsifal	MC	1992	CREA	Italy	INRA 92-1/D81028	P3	P3	Admx
PC32	MC	2006	CREA	Italy	Breeding line derived from F6 Latino/Primadur	P3	P3	Admx
Pedroso	MC	1994	CREA	Spain	Unknown	P3	P3	Admx
Pietrafitta	MC	1999	CREA	Italy	Grazia/Isa	P3	P2b	G10
Platani	MC	1995	CREA	Italy	Valnova/Capeiti-8	P2	P2b	G10
Plinio	MC	1988	CREA	Italy	Linea D50/Trigo Candeal	P2	P2b	Admx
Polesine	MC	1975	CREA	#N/A	Forlani (Tr. aestivum)/Aziziah	P2	P2b	Admx
PR22D89	MC	2005	CREA	Italy	Ofanto/Duilio//Ixos	Admx	P2b	Admx
Preco	MC	1995	CREA	USA	Edmore/WPB881//Selected line 3	P3	P3	G11
Primadur	MC	1994	CREA	France	Blondur//2587-8-6/Leeds	P3	P3	G11
Produra	MC	1980	CREA	#N/A	Tremes-Molle-Enano/2*Tehuacan-60/3/Zenati-Bouteille/Wells/4/2*Barrigon-Yaqui-Enano/Tehuacan-60/Tacur-Tipo-125-E/2*Tehuacan-60	Admx	Admx	Admx
Provenzal	MC	1988	CREA	Italy	CIMMYT's selection (ATO’S CII3EIPUSOA 580)	P3	P3	G11
Quadrato	MC	1999	CREA	Italy	Creso/Trinakria	P3	Admx	Admx
Quadruro	MC	1984	CREA	Italy	SC-146/ID83-NE	Admx	Admx	G16
Ramirez	MC	2007	CREA	France	Unknown	P3	P3	G12
RGT Daurur	MC	2013	CREA	France	Unknown	P3	P3	Admx
Rusticano	MC	1996	CREA	Italy	SHEARWATER(SIB)/(SIB)YAVAROS-79	P3	P3	G14
San Carlo	MC	1996	CREA	Italy	Grazia/Degamit	P3	P3	Admx
Sansone	MC	1977	CREA	#N/A	Mara (Tr. aestivum)/Cappelli	Admx	Admx	Admx
Saragolla.CREA	MC	2004	CREA	Italy	Iride/Line SPB 0114	P3	P3	Admx
Simeto	MC	1988	CREA	Italy	Capeit-8/Valnova	P2	P2b	Admx
Svevo	MC	1996	CREA	Italy	CIMMYT's selection/Zenit	P3	P3	Admx
Sy Cysco	MC	2010	CREA	France	Unknown	P3	Admx	Admx
Sy Gilbratar	MC	2011	CREA	France	Unknown	P3	P3	G12
Tirex	MC	2007	CREA	Italy	Svevo x Nefer	P3	P3	G14
Tito	MC	1976	CREA	#N/A	Lakota/Castelporziano	P3	P3	G11
Tiziana	MC	2001	CREA	Italy	Peleo/Neodur	P3	P3	G11
Tresor	MC	1984	CREA	Italy	Amber durum/S-22-80	P3	P3	G14
UC1113	MC	2006	CREA	USA	Kingfisher //Rossia/BD-1419/3/Mexi/CP/4/Waha/5/Yavaros-79	P3	P3	G15
Valerio	MC	2002	CREA	Italy	CANADIAN-LINE/CRESO//TURKISH-LINE/CAPEITI-8	P3	P3	G15
Valforte	MC	1980	CREA	#N/A	VZ-156/Cappelli//Yuma/2*Cappelli	P2	P2b	G10
Valgerardo	MC	1975	CREA	#N/A	Giorgio-324//Senatore Cappelli/Yuma	P2	P2b	G10
Valnova	MC	1975	CREA	#N/A	Giorgio-324//Senatore Cappelli/Yuma	P2	P2b	Admx
Varano	MC	1997	CREA	Italy	Capeiti-8/Creso//Creso/3/Valforte/Trinakria	P2	P2b	G10
Vendetta	MC	2003	CREA	Italy	Creso/Ofanto	Admx	P2b	Admx
Vesuvio	MC	1996	CREA	Italy	Ofanto/Simeto	P2	P2b	Admx
Virgilio	MC	2002	CREA	Italy	Acalou/Shoula	P3	P3	G11
Vitromax	MC	1996	CREA	Spain	Turchia77/3/Jori/Anhunga//Flamingo, Mex	P3	P3	G11
West bread 881	MC	1992	CREA	USA	Complex cross of Ward, Wells, Cando, Waskana, Mexicali 75	Admx	P2b	G10
Zenit	MC	1992	CREA	Italy	VALRICCARDO/VIC	P3	P3	G16

## Sheet: Table S2
Table S2. List of private alleles in the three sub-populations. (LR = landraces; OC = old cultivars, MC = modern cultivars)
Population	SNP	Chromosome	Position
LR	tplb0025b13_2054	1A	3075188
LR	Kukri_c7192_1128	1A	3080236
LR	BS00026456_51	1A	3273442
LR	CAP12_c3074_192	1A	4258494
LR	RAC875_c30657_82	1A	6542081
LR	BS00023201_51	1A	6918899
LR	BS00022355_51	1A	6940513
LR	Kukri_c2332_1093	1A	6941846
LR	GENE-0172_551	1A	9127217
LR	Tdurum_contig68637_256	1A	9128337
LR	Tdurum_contig42479_3110	1A	11205085
LR	Tdurum_contig83113_134	1A	12344849
LR	BS00003761_51	1A	14994608
LR	BS00039749_51	1A	18563960
LR	wsnp_Ex_c10783_17554146	1A	24176097
LR	GENE-0427_442	1A	25081797
LR	Kukri_c13136_1363	1A	30658116
LR	Kukri_c63336_621	1A	33143692
LR	Ra_c29142_340	1A	34380081
LR	Kukri_c82555_88	1A	35206085
LR	RAC875_c8271_1352	1A	37799405
LR	RAC875_c826_2186	1A	41113285
LR	Tdurum_contig5008_635	1A	49460159
LR	IACX5982	1A	50765158
LR	Tdurum_contig19102_84	1A	280796407
LR	BS00065930_51	1A	290488823
LR	TA001042-0912	1A	302768013
LR	BS00064679_51	1A	313632182
LR	BS00072686_51	1A	314979351
LR	IAAV6919	1A	326169932
LR	wsnp_Ex_c44049_50205457	1A	339379350
LR	wsnp_Ex_c8364_14095508	1A	340550674
LR	RAC875_c6338_2719	1A	351782973
LR	wsnp_Ex_c8885_14842394	1A	353907087
LR	CAP12_c6266_339	1A	356537937
LR	BobWhite_c46349_402	1A	356661853
LR	Kukri_c47825_138	1A	365078079
LR	Tdurum_contig48416_335	1A	371174011
LR	Tdurum_contig21737_203	1A	375547065
LR	wsnp_Ra_c24776_34331660	1A	378466672
LR	GENE-0491_632	1A	392016603
LR	wsnp_Ex_c572_1138503	1A	464822593
LR	RAC875_c86680_391	1A	467274229
LR	BobWhite_c38865_319	1A	467708290
LR	IACX3496	1A	473397696
LR	Excalibur_c34625_281	1A	482635087
LR	BS00067420_51	1A	482795712
LR	Excalibur_c7033_159	1A	484188203
LR	BS00087600_51	1A	484190582
LR	BS00002216_51	1A	484861729
LR	IACX4378	1A	484861759
LR	RAC875_c23081_141	1A	493616458
LR	Kukri_c25215_124	1A	494645908
LR	IACX5921	1A	502782442
LR	Kukri_rep_c117029_125	1A	503810306
LR	wsnp_BE445113A_Ta_2_1	1A	503852292
LR	Kukri_c58155_786	1A	507262516
LR	CAP8_rep_c7343_88	1A	511616947
LR	wsnp_Ku_c23012_32893918	1A	518866475
LR	BS00022788_51	1A	519222633
LR	Kukri_c18017_1696	1A	522867990
LR	GENE-0392_97	1A	528098778
LR	RAC875_c15975_1208	1A	532705756
LR	Kukri_c24570_282	1A	538929719
LR	wsnp_RFL_Contig3542_3718200	1A	539016736
LR	Ku_c8992_405	1A	539359146
LR	RFL_Contig5334_831	1A	540923782
LR	Ra_c29200_300	1A	544848561
LR	Excalibur_c1936_1072	1A	563900011
LR	Kukri_c51781_199	1A	568500744
LR	BobWhite_c9091_160	1A	570123139
LR	BS00023114_51	1A	576853869
LR	BS00022824_51	1A	577234552
LR	wsnp_Ex_c9343_15514531	1A	577599073
LR	wsnp_Ex_c3201_5910642	1A	579446221
LR	BS00065170_51	1A	582636662
LR	BS00093275_51	1A	583889227
LR	GENE-0543_1074	1A	587099800
LR	BobWhite_c44947_277	1A	588495700
LR	Tdurum_contig47006_2711	1A	593106091
LR	IACX502	1B	6564658
LR	RFL_Contig3481_1669	1B	6994959
LR	Kukri_c8390_1515	1B	8294890
LR	Excalibur_c43567_850	1B	8294925
LR	Kukri_c36151_170	1B	10638274
LR	BS00004903_51	1B	12390049
LR	RAC875_c113582_346	1B	12434268
LR	BS00105846_51	1B	14950118
LR	BS00011695_51	1B	15261975
LR	Ku_c31363_2165	1B	16073465
LR	Tdurum_contig50667_306	1B	19555352
LR	BS00110121_51	1B	20508531
LR	wsnp_Ex_c5780_10153638	1B	23748570
LR	wsnp_Ra_c19335_28504388	1B	49389528
LR	RFL_Contig2160_617	1B	49454137
LR	RAC875_c90169_393	1B	50082801
LR	wsnp_Ex_c12063_19310114	1B	55737895
LR	Tdurum_contig11004_613	1B	59869089
LR	Tdurum_contig75938_1546	1B	59872881
LR	RAC875_c79370_378	1B	64121778
LR	Kukri_c5861_360	1B	72862357
LR	RAC875_c28894_526	1B	108237116
LR	Kukri_c5098_1902	1B	124961597
LR	BobWhite_rep_c62985_546	1B	162668391
LR	RAC875_rep_c72356_51	1B	172357799
LR	Tdurum_contig13095_97	1B	190056044
LR	IAAV3828	1B	211022701
LR	Kukri_c13537_2069	1B	287369047
LR	RAC875_c53382_120	1B	291216505
LR	BobWhite_rep_c66146_237	1B	296104236
LR	Ra_c7745_1438	1B	300480600
LR	Excalibur_c15885_1145	1B	320977522
LR	BS00018461_51	1B	327176456
LR	RAC875_c21274_235	1B	327331849
LR	Excalibur_c27675_912	1B	328665810
LR	Excalibur_s113941_196	1B	333961447
LR	Kukri_c49091_415	1B	338035574
LR	Kukri_c49091_371	1B	338035618
LR	IACX8300	1B	348552394
LR	RAC875_c42206_305	1B	354207493
LR	Kukri_c25839_487	1B	360839857
LR	TA004947-0758	1B	361549473
LR	Tdurum_contig51348_326	1B	369936405
LR	GENE-0193_197	1B	373812285
LR	BS00029345_51	1B	387331812
LR	BS00052075_51	1B	391580573
LR	BS00052089_51	1B	391580701
LR	Tdurum_contig46780_203	1B	393803075
LR	CAP7_c302_518	1B	394368142
LR	BS00021947_51	1B	412087913
LR	Tdurum_contig43910_687	1B	414732065
LR	Ku_c13515_171	1B	415577365
LR	GENE-0283_330	1B	425043171
LR	RAC875_c9833_297	1B	430333648
LR	Tdurum_contig28530_380	1B	435546268
LR	BS00069723_51	1B	461188135
LR	wsnp_Ex_c2025_3799847	1B	461957974
LR	BobWhite_c441_976	1B	462796994
LR	BS00078431_51	1B	472382595
LR	BobWhite_c1967_388	1B	475125984
LR	wsnp_Ku_c24323_34285350	1B	479467638
LR	GENE-0142_178	1B	481512581
LR	BS00071465_51	1B	481741778
LR	Kukri_c84940_106	1B	482777703
LR	Tdurum_contig59449_400	1B	493545058
LR	BS00022615_51	1B	506240166
LR	GENE-0004_635	1B	521068121
LR	BobWhite_rep_c63278_349	1B	524098719
LR	RAC875_c102223_220	1B	541690869
LR	RAC875_c7674_634	1B	545386072
LR	wsnp_Ex_c7447_12752449	1B	547975533
LR	RAC875_c32077_284	1B	548890178
LR	Tdurum_contig25457_175	1B	550517382
LR	Kukri_c66451_128	1B	553832917
LR	wsnp_JD_c6331_7499060	1B	553899486
LR	GENE-0293_154	1B	554446413
LR	RAC875_c95548_156	1B	556131573
LR	IACX9308	1B	556291025
LR	Kukri_rep_c111991_498	1B	558168001
LR	wsnp_Ex_rep_c101231_86636951	1B	560274667
LR	BobWhite_rep_c57575_65	1B	560626677
LR	BS00021975_51	1B	560802293
LR	BS00081396_51	1B	561002592
LR	Tdurum_contig48523_1605	1B	565284372
LR	RAC875_c24895_311	1B	566311830
LR	IACX9183	1B	566531793
LR	wsnp_Ex_c39616_46871127	1B	567427927
LR	BS00021710_51	1B	567932010
LR	wsnp_Ex_c22439_31632880	1B	568059340
LR	Ku_c106533_550	1B	568716829
LR	Tdurum_contig47550_699	1B	571576071
LR	wsnp_Ex_rep_c107911_91350930	1B	574442254
LR	wsnp_Ex_c15611_23929128	1B	576022762
LR	wsnp_Ex_c7585_12957020	1B	578016469
LR	Tdurum_contig13117_1316	1B	579324815
LR	BS00089031_51	1B	580494385
LR	Excalibur_c27915_560	1B	588623685
LR	RAC875_c62171_386	1B	595614226
LR	BS00066338_51	1B	595782864
LR	Tdurum_contig83079_133	1B	599756911
LR	Kukri_c49463_154	1B	600811002
LR	Excalibur_rep_c107047_742	1B	609661313
LR	IACX886	1B	610930699
LR	TA003586-0637	1B	620499795
LR	Kukri_c11389_232	1B	625782466
LR	RAC875_c47427_75	1B	630020926
LR	BS00083060_51	1B	630021199
LR	wsnp_Ex_c5296_9365860	1B	635076912
LR	BS00096498_51	1B	637102074
LR	tplb0043k02_463	1B	638931514
LR	BS00075129_51	1B	658705259
LR	IAAV3040	1B	674363933
LR	RAC875_c9770_123	1B	675002335
LR	BS00060686_51	1B	677133286
LR	Kukri_c14292_157	1B	677679520
LR	BS00063302_51	1B	678645585
LR	BS00063537_51	1B	680574191
LR	wsnp_Ex_c649_1279852	1B	682519208
LR	wsnp_Ku_c26281_36243489	1B	682866630
LR	wsnp_Ex_c750_1474351	1B	687791243
LR	wsnp_Ex_c1597_3045682	1B	688960223
LR	RFL_Contig174_406	2A	2755300
LR	wsnp_Ku_c23598_33524490	2A	2879432
LR	wsnp_Ex_c11950_19164191	2A	3707808
LR	wsnp_Ku_c33374_42877546	2A	4319154
LR	RAC875_c5577_1682	2A	4571402
LR	Kukri_c40204_141	2A	5693105
LR	BS00068050_51	2A	6190232
LR	Kukri_c31776_1621	2A	6230814
LR	Kukri_c52200_878	2A	11401404
LR	Tdurum_contig49928_424	2A	11762702
LR	Tdurum_contig77522_310	2A	15009989
LR	Kukri_c3882_2021	2A	21673888
LR	BS00021706_51	2A	25071379
LR	Excalibur_c21663_145	2A	25317784
LR	RAC875_c11652_544	2A	33560676
LR	BobWhite_c2022_245	2A	33572232
LR	RAC875_c21868_792	2A	33784581
LR	RAC875_rep_c78744_228	2A	35883737
LR	Tdurum_contig11803_475	2A	39633108
LR	wsnp_Ex_c19556_28530243	2A	39641886
LR	wsnp_Ex_c2033_3814035	2A	40214726
LR	BS00075524_51	2A	45278348
LR	Kukri_c56203_965	2A	51553934
LR	Excalibur_c61806_213	2A	52167383
LR	RAC875_c11609_62	2A	70202767
LR	RAC875_c34757_180	2A	74091572
LR	wsnp_CAP11_rep_c8768_3788007	2A	81929448
LR	BS00021739_51	2A	83242902
LR	GENE-0644_421	2A	87269349
LR	Excalibur_c50934_159	2A	88745854
LR	Ex_c721_2374	2A	89107612
LR	Ra_c2655_504	2A	89111500
LR	Tdurum_contig56511_144	2A	92264626
LR	IAAV539	2A	101304189
LR	IACX1412	2A	108856140
LR	wsnp_Ex_c22862_32074455	2A	168177098
LR	BS00091670_51	2A	202264464
LR	GENE-0689_30	2A	353955313
LR	BS00055514_51	2A	539039026
LR	BS00062756_51	2A	550245180
LR	Excalibur_c1793_97	2A	567458285
LR	RAC875_c63975_307	2A	567881926
LR	Tdurum_contig30451_88	2A	597900804
LR	Ku_c5710_312	2A	599948980
LR	Excalibur_c42364_134	2A	602200141
LR	GENE-4029_80	2A	617274483
LR	Excalibur_c34913_743	2A	617813318
LR	IAAV2718	2A	674085358
LR	GENE-1381_110	2A	684186146
LR	wsnp_Ku_c8927_15048149	2A	684470119
LR	RAC875_c21906_247	2A	684729362
LR	BobWhite_c3833_815	2A	686054164
LR	BS00089497_51	2A	687836595
LR	CAP12_rep_c6956_169	2A	690377743
LR	BS00096882_51	2A	694101919
LR	Kukri_c40121_373	2A	697505186
LR	BS00029332_51	2A	698535712
LR	Excalibur_rep_c102052_721	2A	698560531
LR	CAP11_c2194_115	2A	702042071
LR	Kukri_rep_c104611_210	2A	702828329
LR	RAC875_c110838_165	2A	705639488
LR	Ku_c13700_1196	2A	705640026
LR	RAC875_c42648_115	2A	709157028
LR	BS00080752_51	2A	711379344
LR	BS00081506_51	2A	711747350
LR	Excalibur_c57590_187	2A	715395367
LR	Excalibur_c2484_2113	2A	719155180
LR	BS00082084_51	2A	725697816
LR	BS00024921_51	2A	726230675
LR	wsnp_RFL_Contig1892_1042675	2A	728036694
LR	RAC875_c20979_234	2A	734701823
LR	BobWhite_c31163_694	2A	739234454
LR	Tdurum_contig84245_154	2A	739313796
LR	BobWhite_c15773_166	2A	744219155
LR	BobWhite_c33464_133	2A	748191428
LR	BobWhite_rep_c64068_241	2A	754830326
LR	RAC875_rep_c83950_222	2A	754880508
LR	BobWhite_c24069_257	2A	755561327
LR	Tdurum_contig50839_279	2A	759026942
LR	wsnp_JD_c289_450995	2A	763115448
LR	Excalibur_c28885_615	2A	773841848
LR	wsnp_Ex_c63909_62932437	2A	773844194
LR	RAC875_c34512_685	2B	3460309
LR	BS00023068_51	2B	4779715
LR	Kukri_c98858_299	2B	8288989
LR	Excalibur_c31042_178	2B	13270440
LR	tplb0058m16_1152	2B	13891115
LR	wsnp_Ex_rep_c66551_64836327	2B	20781723
LR	BS00053880_51	2B	20795222
LR	BS00022059_51	2B	20872400
LR	BS00011149_51	2B	21582964
LR	RFL_Contig1863_250	2B	22263920
LR	RAC875_rep_c106596_127	2B	22363856
LR	RAC875_rep_c88665_100	2B	25947347
LR	RAC875_rep_c88665_52	2B	25947395
LR	Kukri_rep_c104422_192	2B	26271792
LR	wsnp_Ex_c1962_3696265	2B	37293231
LR	Ex_c17993_470	2B	39354332
LR	BobWhite_rep_c63363_160	2B	43461610
LR	BS00022487_51	2B	46799238
LR	Tdurum_contig11803_850	2B	55817538
LR	Kukri_c26288_419	2B	58281791
LR	wsnp_Ex_c21092_30220342	2B	63234517
LR	RAC875_c34516_316	2B	69798116
LR	Ku_c5725_892	2B	76126796
LR	Kukri_c12368_82	2B	77157330
LR	RAC875_c22429_249	2B	77157429
LR	RAC875_rep_c99492_65	2B	96002101
LR	BS00022422_51	2B	96236067
LR	Tdurum_contig47202_1699	2B	98440513
LR	BS00023221_51	2B	99846085
LR	IACX6223	2B	100802729
LR	BS00067337_51	2B	104148999
LR	BS00043099_51	2B	106674561
LR	BS00079213_51	2B	111134435
LR	RFL_Contig4542_1281	2B	111672534
LR	BS00071690_51	2B	112255257
LR	BS00110442_51	2B	112540160
LR	Kukri_c4790_154	2B	112929650
LR	Kukri_c40637_223	2B	115173118
LR	Kukri_c7193_5892	2B	119740806
LR	RAC875_rep_c70093_1079	2B	127776862
LR	RFL_Contig1633_304	2B	136821654
LR	BS00083078_51	2B	137575047
LR	Ku_c23446_2209	2B	139615608
LR	Ra_c106376_879	2B	141716172
LR	RAC875_rep_c72435_90	2B	143020836
LR	Excalibur_c15031_73	2B	144931062
LR	BobWhite_c14476_80	2B	145201918
LR	Tdurum_contig15512_429	2B	145209575
LR	BS00022417_51	2B	148475703
LR	RAC875_c2110_117	2B	152555317
LR	Tdurum_contig18197_86	2B	158245521
LR	RFL_Contig189_894	2B	159128444
LR	RAC875_c47353_350	2B	159359740
LR	GENE-2904_476	2B	159799693
LR	Kukri_c6973_344	2B	159800078
LR	Excalibur_c9248_771	2B	163838247
LR	Excalibur_c23723_141	2B	166282581
LR	BS00070091_51	2B	168545490
LR	BS00035894_51	2B	168932312
LR	BS00031814_51	2B	172705705
LR	wsnp_Ex_rep_c101906_87187119	2B	181013877
LR	BobWhite_c7786_376	2B	182471492
LR	wsnp_Ex_c51461_55394646	2B	185534982
LR	IAAV1903	2B	186849423
LR	wsnp_Ex_rep_c106085_90293854	2B	195289468
LR	RAC875_c8045_231	2B	205359143
LR	Kukri_c32980_680	2B	208457093
LR	RAC875_c46661_184	2B	212260377
LR	BS00078506_51	2B	213874720
LR	BobWhite_c892_73	2B	214572358
LR	Ra_c6700_406	2B	218203577
LR	RAC875_rep_c109975_192	2B	239504659
LR	Excalibur_c25921_230	2B	240330117
LR	RAC875_c63112_460	2B	242346367
LR	GENE-0968_155	2B	248661787
LR	TA001505-1171	2B	250881663
LR	BS00072379_51	2B	252222462
LR	TA002695-2341	2B	383143230
LR	wsnp_Ex_c10279_16851747	2B	408712425
LR	wsnp_Ex_rep_c66524_64799410	2B	442988004
LR	BobWhite_c16735_131	2B	443642639
LR	BS00066545_51	2B	451880516
LR	BobWhite_c31986_324	2B	456426953
LR	BobWhite_c27816_523	2B	458261575
LR	Tdurum_contig61682_187	2B	474980368
LR	RAC875_c39665_175	2B	487540069
LR	wsnp_CAP7_c1453_728076	2B	525347613
LR	Tdurum_contig12836_418	2B	528712939
LR	Tdurum_contig27880_199	2B	530986778
LR	wsnp_Ex_c29445_38480890	2B	532924372
LR	Tdurum_contig27828_177	2B	540155532
LR	wsnp_Ex_c8894_14858193	2B	540889203
LR	wsnp_Ex_c25217_34481787	2B	543195239
LR	Jagger_c6853_60	2B	546862873
LR	Tdurum_contig92604_368	2B	546900973
LR	Tdurum_contig26542_457	2B	553914829
LR	BS00100563_51	2B	563614728
LR	Excalibur_rep_c66577_159	2B	571157203
LR	Ku_c3202_1646	2B	574246692
LR	wsnp_Ex_c114_230248	2B	578171873
LR	BS00035335_51	2B	589986373
LR	BS00064448_51	2B	590104955
LR	BS00091068_51	2B	591667665
LR	Kukri_c19751_873	2B	592191562
LR	JG_c2092_196	2B	617138512
LR	wsnp_Ex_c46576_52042185	2B	629503133
LR	Tdurum_contig54925_225	2B	632953405
LR	Kukri_c9785_62	2B	639122868
LR	IAAV5675	2B	641409434
LR	GENE-0675_104	2B	643230424
LR	Excalibur_c71500_231	2B	644555576
LR	Kukri_c4294_371	2B	644994322
LR	Tdurum_contig12459_491	2B	648273517
LR	BS00105409_51	2B	651614564
LR	Excalibur_c25414_806	2B	653158256
LR	Kukri_c49007_501	2B	655417150
LR	wsnp_Ex_c922_1775246	2B	658374989
LR	Kukri_c49010_266	2B	660935938
LR	BobWhite_c5543_492	2B	661599974
LR	wsnp_Ex_c58274_59639258	2B	662339591
LR	BobWhite_rep_c64679_73	2B	663193584
LR	BS00046166_51	2B	669754451
LR	Excalibur_rep_c77221_93	2B	677865933
LR	IAAV6424	2B	687952269
LR	RFL_Contig2612_826	2B	688485636
LR	Kukri_c74165_204	2B	689963965
LR	wsnp_Ex_c5123_9087869	2B	691372944
LR	Ex_c16948_754	2B	695089607
LR	BobWhite_c16923_64	2B	701540319
LR	Excalibur_c60964_203	2B	703967688
LR	Tdurum_contig78534_314	2B	716743139
LR	BS00067907_51	2B	718202231
LR	Excalibur_c35074_257	2B	730093137
LR	BS00035380_51	2B	736551576
LR	wsnp_RFL_Contig2914_2757372	2B	737067899
LR	BobWhite_rep_c65414_125	2B	740038637
LR	wsnp_RFL_Contig3273_3319580	2B	741333978
LR	wsnp_JD_c12346_12606967	2B	743750286
LR	BS00010988_51	2B	746872523
LR	Kukri_c44368_240	2B	747510941
LR	RAC875_c22463_494	2B	765545226
LR	RAC875_c37540_583	2B	767278469
LR	Kukri_c657_1139	2B	773012854
LR	RFL_Contig2751_1562	2B	774776419
LR	Excalibur_c5438_274	2B	774789449
LR	Tdurum_contig14482_423	2B	776334182
LR	Excalibur_rep_c69149_1588	2B	776814401
LR	Excalibur_rep_c107890_89	2B	778422543
LR	RAC875_c18928_455	2B	782407552
LR	Ex_c67202_741	2B	783475550
LR	BS00004413_51	2B	785538150
LR	BS00022185_51	2B	786131883
LR	Kukri_c94792_127	2B	786808320
LR	Jagger_c10188_98	2B	787016842
LR	wsnp_Ex_c41300_48154348	2B	787119883
LR	BS00100118_51	2B	788527190
LR	Excalibur_c94383_157	2B	789506444
LR	BS00072840_51	2B	789671877
LR	BS00026037_51	2B	793213735
LR	GENE-0676_322	2B	796551637
LR	BS00065264_51	2B	796613806
LR	RAC875_c19042_2102	2B	802543030
LR	RFL_Contig5508_1283	3A	1376052
LR	BobWhite_c17021_269	3A	2368278
LR	Excalibur_c1084_229	3A	3254065
LR	RAC875_c3956_275	3A	5132935
LR	wsnp_Ex_rep_c66331_64502558	3A	5133847
LR	Kukri_rep_c69028_1398	3A	5134124
LR	RAC875_c36922_829	3A	5410038
LR	tplb0053a24_2194	3A	6812386
LR	Kukri_rep_c89183_282	3A	6908982
LR	Excalibur_rep_c69004_1008	3A	13676814
LR	RAC875_c43871_154	3A	15423902
LR	Ra_c6118_350	3A	18510702
LR	Kukri_c13830_556	3A	19396617
LR	Kukri_c86406_100	3A	20391516
LR	wsnp_JD_c2722_3653988	3A	20804802
LR	GENE-2732_162	3A	30496887
LR	RAC875_c10246_839	3A	44359240
LR	RAC875_rep_c109701_76	3A	44360933
LR	RAC875_c45016_79	3A	50279744
LR	JG_c3077_214	3A	51426880
LR	BS00065468_51	3A	52476297
LR	Tdurum_contig86206_149	3A	53034991
LR	wsnp_Ku_c40218_48484410	3A	64967841
LR	BS00067216_51	3A	79055138
LR	IAAV9068	3A	81659334
LR	Tdurum_contig10426_280	3A	102573726
LR	TA001218-0519	3A	433396340
LR	Ra_c27641_452	3A	445274337
LR	Excalibur_c29625_222	3A	513689292
LR	Tdurum_contig63129_238	3A	518111928
LR	IAAV4286	3A	521647889
LR	Excalibur_rep_c76510_255	3A	523073228
LR	Ku_c56370_1155	3A	528839080
LR	wsnp_BE443568A_Ta_2_1	3A	544277791
LR	Tdurum_contig11121_834	3A	548526560
LR	wsnp_RFL_Contig4734_5671036	3A	550786049
LR	GENE-1805_65	3A	552907220
LR	RAC875_c67309_634	3A	554642326
LR	BS00101401_51	3A	562864030
LR	wsnp_Ex_c1149_2206471	3A	563020737
LR	BS00003971_51	3A	567573694
LR	wsnp_Ra_c34117_42876812	3A	568014674
LR	wsnp_Ex_c28930_38008757	3A	568416701
LR	BobWhite_c13099_755	3A	568425123
LR	Kukri_rep_c87640_135	3A	570072128
LR	IAAV902	3A	570343381
LR	Excalibur_c82403_135	3A	572414620
LR	IAAV3838	3A	584321209
LR	wsnp_Ex_c18223_27035083	3A	599462131
LR	BS00056089_51	3A	613050829
LR	GENE-1724_72	3A	639142721
LR	Ku_c172_840	3A	645350846
LR	wsnp_Ex_rep_c67786_66472676	3A	648900201
LR	BS00063300_51	3A	649959371
LR	IACX5899	3A	655366438
LR	RAC875_c79551_167	3A	662009944
LR	BS00068094_51	3A	663207657
LR	Kukri_c63259_151	3A	665450215
LR	BS00023337_51	3A	682143606
LR	IACX6065	3A	691835148
LR	wsnp_Ex_c20250_29303152	3A	692562654
LR	BS00022368_51	3A	694180277
LR	BS00097265_51	3A	698355596
LR	BS00067228_51	3A	698744471
LR	Excalibur_c32726_125	3A	708789557
LR	Excalibur_c24829_189	3A	724225532
LR	BobWhite_c15763_205	3A	726594370
LR	Excalibur_c361_1321	3A	735808375
LR	Tdurum_contig100787_79	3A	736478789
LR	JD_c7528_325	3A	737500148
LR	TA003550-0145	3A	742729376
LR	Kukri_s117946_404	3A	743466515
LR	tplb0028p23_691	3B	2587065
LR	Kukri_c17082_519	3B	2617919
LR	Kukri_c17082_378	3B	2618060
LR	Tdurum_contig11192_373	3B	5955188
LR	IACX5776	3B	6286651
LR	wsnp_Ex_c8360_14085858	3B	6286848
LR	Tdurum_contig34149_219	3B	6687655
LR	wsnp_Ex_rep_c67635_66292308	3B	7167398
LR	Ra_c17608_960	3B	9477094
LR	RAC875_c8459_1291	3B	9512153
LR	BobWhite_c3902_210	3B	10448154
LR	BobWhite_c3902_175	3B	10448189
LR	BS00098868_51	3B	11621323
LR	TA002103-1262	3B	12304279
LR	RAC875_c53353_78	3B	13088274
LR	RAC875_c5966_1854	3B	13091024
LR	Tdurum_contig80344_144	3B	13986394
LR	BS00010849_51	3B	16989244
LR	tplb0041e10_1230	3B	20232152
LR	IAAV6442	3B	20233326
LR	Kukri_rep_c101341_425	3B	20241610
LR	RAC875_c36432_172	3B	20315431
LR	wsnp_Ra_c16264_24873670	3B	21353322
LR	IACX6214	3B	21677891
LR	IAAV3924	3B	23641716
LR	Tdurum_contig49753_191	3B	24183250
LR	Tdurum_contig11684_144	3B	26729324
LR	wsnp_Ex_c57450_59156677	3B	28405423
LR	GENE-4824_212	3B	28737187
LR	RFL_Contig3455_700	3B	30146728
LR	IAAV1043	3B	33540862
LR	Excalibur_c24391_321	3B	35708175
LR	Jagger_c4901_95	3B	47728033
LR	Tdurum_contig67690_183	3B	59611477
LR	Kukri_c10017_833	3B	60869551
LR	wsnp_JD_c828_1226159	3B	68824238
LR	GENE-1900_115	3B	69424531
LR	IACX2048	3B	71847730
LR	wsnp_Ex_c19372_28313727	3B	78049852
LR	RAC875_c86306_256	3B	80178258
LR	RAC875_c3138_224	3B	81074329
LR	Kukri_rep_c102953_304	3B	101147135
LR	Kukri_rep_c101837_143	3B	123584535
LR	Tdurum_contig100403_128	3B	126890001
LR	wsnp_Ex_c5657_9942445	3B	144758951
LR	wsnp_Ex_c54357_57265797	3B	145520797
LR	IACX971	3B	152297658
LR	Excalibur_c35491_788	3B	158798138
LR	BS00045195_51	3B	168336419
LR	tplb0062h15_59	3B	180804445
LR	Excalibur_c18641_1849	3B	217517347
LR	Kukri_c37029_761	3B	238373815
LR	Excalibur_c9001_569	3B	361314888
LR	wsnp_BE489326B_Ta_2_1	3B	422173560
LR	BobWhite_c16847_343	3B	422345528
LR	Excalibur_c63730_660	3B	424494143
LR	wsnp_Ku_c18538_27857915	3B	433253870
LR	RFL_Contig5246_1091	3B	457444385
LR	BobWhite_c11540_60	3B	462102355
LR	Ku_c1005_1173	3B	474037814
LR	TA005793-0515	3B	480852034
LR	RAC875_c44365_203	3B	485018726
LR	BS00023645_51	3B	491496431
LR	RAC875_c43893_213	3B	493179546
LR	BS00105995_51	3B	495590055
LR	wsnp_Ex_c7172_12318529	3B	499594518
LR	RAC875_c3760_770	3B	502355780
LR	wsnp_Ex_c5457_9632050	3B	504094525
LR	Kukri_rep_c114738_144	3B	513598230
LR	Ra_c88203_468	3B	519253172
LR	D_contig22919_290	3B	525118294
LR	BS00089954_51	3B	556255751
LR	Excalibur_rep_c101410_789	3B	565963958
LR	BS00011612_51	3B	568472805
LR	RAC875_rep_c71248_689	3B	568473735
LR	IACX3871	3B	573514851
LR	Ku_c101932_436	3B	575186726
LR	RAC875_c58159_989	3B	577002479
LR	BS00033372_51	3B	577507831
LR	Kukri_c11910_445	3B	578045843
LR	RFL_Contig5418_347	3B	580200770
LR	wsnp_Ex_c2314_4333242	3B	581528712
LR	Kukri_c9571_73	3B	583068693
LR	wsnp_BE490744B_Ta_2_2	3B	584143698
LR	Excalibur_c62826_254	3B	588806497
LR	wsnp_Ku_c13311_21255891	3B	596628804
LR	IACX11310	3B	596978455
LR	IACX5912	3B	597320643
LR	Excalibur_rep_c69241_274	3B	598924252
LR	BS00037225_51	3B	600614499
LR	Tdurum_contig56661_291	3B	604492858
LR	wsnp_JD_c10602_11238420	3B	607062817
LR	BobWhite_rep_c64944_264	3B	610083784
LR	BobWhite_c32864_250	3B	615888869
LR	BobWhite_c12281_752	3B	616273703
LR	BobWhite_c17191_297	3B	616804523
LR	BS00062824_51	3B	625976395
LR	BS00097383_51	3B	644432397
LR	BobWhite_c14365_59	3B	651153534
LR	Excalibur_c43822_370	3B	659745706
LR	BS00032926_51	3B	666414226
LR	BS00065107_51	3B	671035202
LR	RAC875_c16281_167	3B	672558055
LR	RFL_Contig5871_1771	3B	675449867
LR	Ra_c3129_2015	3B	682912285
LR	BS00083391_51	3B	697575523
LR	BobWhite_c40861_320	3B	697575546
LR	BS00058272_51	3B	699031777
LR	wsnp_BQ167580B_Ta_2_1	3B	699546699
LR	wsnp_JD_c29407_23413291	3B	703090339
LR	BobWhite_c24457_126	3B	704557920
LR	Kukri_rep_c72702_220	3B	712486106
LR	BobWhite_rep_c66990_294+	3B	719820426
LR	Kukri_c29142_450	3B	729385726
LR	wsnp_Ex_c11837_18996495	3B	731757359
LR	Excalibur_c60319_127	3B	732131833
LR	Ku_c1575_485	3B	740153394
LR	wsnp_Ex_c64005_62986957	3B	742641428
LR	wsnp_Ex_rep_c66893_65301351	3B	742868501
LR	wsnp_Ex_rep_c68193_66971396	3B	743952358
LR	RAC875_rep_c118396_333	3B	744947004
LR	Excalibur_rep_c66942_58	3B	747281667
LR	RAC875_c69_499	3B	749700418
LR	BS00072993_51	3B	752464643
LR	wsnp_Ex_c19778_28779907	3B	752468209
LR	wsnp_Ex_c57007_58898157	3B	755357942
LR	wsnp_JD_c4413_5541190	3B	755941010
LR	BS00059416_51	3B	758529103
LR	BS00077967_51	3B	762118144
LR	BS00038349_51	3B	762690377
LR	BS00085434_51	3B	762882426
LR	Tdurum_contig32277_121	3B	763249039
LR	wsnp_Ex_c700_1379957	3B	766087077
LR	BS00099738_51	3B	772933988
LR	Excalibur_c24354_465	3B	773884432
LR	BS00030651_51	3B	778548295
LR	Ra_c8960_147	3B	778996663
LR	BS00024883_51	3B	791444160
LR	BS00069273_51	3B	794931002
LR	BS00037871_51	3B	809504781
LR	RAC875_c39339_400	3B	813336902
LR	BS00044944_51	3B	824853730
LR	Tdurum_contig55443_1361	3B	841079968
LR	Tdurum_contig59603_74	4A	10094982
LR	Ex_c883_2618	4A	17594953
LR	Kukri_c53787_620	4A	21533992
LR	RAC875_c58868_397	4A	25220585
LR	Ku_c3891_395	4A	27783138
LR	Ex_c7227_53	4A	27785886
LR	Tdurum_contig11919_360	4A	29109309
LR	Tdurum_contig9906_89	4A	45363622
LR	wsnp_CAP7_c32_19340	4A	101653021
LR	GENE-2354_155	4A	138127618
LR	wsnp_Ex_c38116_45719983	4A	514060283
LR	Excalibur_c32366_122	4A	533609609
LR	Kukri_c48199_102	4A	536042162
LR	Kukri_c9262_401	4A	549678803
LR	Kukri_c26943_862	4A	550276216
LR	wsnp_Ex_c7528_12868250	4A	555690065
LR	RAC875_c27704_420	4A	563661057
LR	wsnp_BF474615A_Ta_1_1	4A	575100745
LR	Excalibur_c96303_224	4A	578011159
LR	Jagger_rep_c10288_53	4A	582993270
LR	RAC875_c48107_65	4A	590301270
LR	Tdurum_contig42083_890	4A	592639564
LR	IAAV615	4A	596416047
LR	wsnp_Ex_c16175_24619793	4A	601394711
LR	BS00037357_51	4A	602106725
LR	RAC875_c13807_1397	4A	602242655
LR	Ku_c46953_153	4A	602763261
LR	RAC875_c34231_812	4A	608254652
LR	Excalibur_c25699_113	4A	615078703
LR	RAC875_c34515_343	4A	615630224
LR	wsnp_Ex_c8843_14783989	4A	616277043
LR	tplb0033c09_1345	4A	617695036
LR	RAC875_c88582_131	4A	618932866
LR	BS00064423_51	4A	618934878
LR	Excalibur_c10696_3390	4A	620105725
LR	Excalibur_rep_c104570_201	4A	620258229
LR	Kukri_rep_c109463_264	4A	621563068
LR	RAC875_c7016_2039	4A	628145962
LR	BS00039148_51	4A	631694096
LR	BobWhite_c10610_1096	4A	631973482
LR	Excalibur_c4325_1440	4A	633814981
LR	Tdurum_contig15586_563	4A	633906931
LR	BobWhite_c22176_230	4A	634458948
LR	RAC875_c35979_263	4A	641381533
LR	tplb0046a02_804	4A	648723476
LR	Excalibur_c3988_1660	4A	650761142
LR	Excalibur_c4370_1451	4A	651311169
LR	BS00056624_51	4A	657515728
LR	RAC875_c83401_115	4A	663263514
LR	TA006348-0950	4A	664764792
LR	BobWhite_c17731_56	4A	675044026
LR	BS00064369_51	4A	677435687
LR	IAAV3960	4A	685584035
LR	Tdurum_contig93100_149	4A	694202031
LR	BobWhite_c47168_289	4A	709784444
LR	BS00110281_51	4A	714960033
LR	Tdurum_contig31218_279	4A	719997126
LR	Tdurum_contig54776_1396	4A	722168073
LR	RAC875_c11702_1015	4A	724634226
LR	Tdurum_contig46583_958	4A	725241381
LR	Tdurum_contig46583_1275	4A	725242537
LR	Excalibur_c14401_743	4B	2007477
LR	TA002019-0994	4B	4508722
LR	BS00060041_51	4B	6110390
LR	Tdurum_contig46867_658	4B	6120159
LR	Tdurum_contig47622_234	4B	12544683
LR	RFL_Contig2277_1527	4B	12556029
LR	Tdurum_contig31139_79	4B	13084979
LR	RAC875_c27160_307	4B	13186245
LR	GENE-3024_71	4B	30089407
LR	BS00062691_51	4B	152797702
LR	wsnp_Ex_c7713_13153321	4B	317819020
LR	Excalibur_c29127_552	4B	363660036
LR	wsnp_BE442869B_Ta_1_1	4B	404164388
LR	Ex_c7593_754	4B	408977155
LR	BS00064935_51	4B	411335265
LR	wsnp_Ex_rep_c70265_69211592	4B	434310504
LR	GENE-2847_1060	4B	434321628
LR	GENE-2768_352	4B	454754839
LR	IAAV5117	4B	503399973
LR	Ku_c33858_325	4B	505885853
LR	RFL_Contig3563_1130	4B	522659488
LR	Ra_c27465_564	4B	524368062
LR	Kukri_c94033_432	4B	525601394
LR	Kukri_c322_1394	4B	525618844
LR	Tdurum_contig54559_211	4B	527135198
LR	Kukri_c74409_199	4B	531874075
LR	Excalibur_c32467_676	4B	539969051
LR	BS00022181_51	4B	558571282
LR	RAC875_c39226_131	4B	566189565
LR	tplb0026o15_1634	4B	606534004
LR	RAC875_c56040_216	4B	609409881
LR	Kukri_c3474_395	4B	610049172
LR	BS00104364_51	4B	611837836
LR	BobWhite_c2646_141	4B	617787155
LR	Ra_c106922_334	4B	618308554
LR	Ra_c5508_706	4B	641364790
LR	Tdurum_contig50861_106	4B	648989804
LR	RAC875_c107130_384	4B	654033946
LR	Kukri_rep_c101259_81	4B	661455440
LR	RAC875_c48025_483	4B	668006328
LR	BS00099534_51	5A	241100
LR	GENE-3324_338	5A	3752135
LR	wsnp_Ex_c16551_25060833	5A	4867733
LR	Excalibur_c6967_1852	5A	6682800
LR	BS00067985_51	5A	6910529
LR	Ex_c95453_1499	5A	9813572
LR	IACX5832	5A	9851676
LR	BS00079189_51	5A	14957738
LR	Kukri_c2514_490	5A	17627214
LR	Tdurum_contig25432_1377	5A	17627552
LR	BS00056932_51	5A	34157445
LR	RAC875_rep_c106118_339	5A	36965010
LR	wsnp_Ex_c15046_23216392	5A	37554671
LR	Ra_c69221_1167	5A	42493463
LR	BS00077990_51	5A	47014804
LR	BS00021660_51	5A	48236097
LR	BS00045284_51	5A	109363763
LR	RAC875_c31051_490	5A	215514371
LR	CAP8_c2014_192	5A	237782326
LR	wsnp_Ex_c4921_8764088	5A	238662915
LR	BS00022191_51	5A	240571068
LR	wsnp_Ex_c39592_46849607	5A	240774585
LR	BobWhite_c13238_386	5A	242221719
LR	Tdurum_contig10546_273	5A	416278979
LR	Kukri_c3338_271	5A	421232599
LR	Excalibur_c7180_862	5A	435964905
LR	BS00022003_51	5A	442683373
LR	wsnp_BE443187A_Ta_2_3	5A	448076184
LR	BS00076221_51	5A	448354142
LR	BS00076190_51	5A	454217033
LR	BS00100178_51	5A	460254476
LR	wsnp_JD_c9510_10342089	5A	467128232
LR	Kukri_c10530_1044	5A	479047598
LR	RAC875_c99519_227	5A	484856061
LR	Excalibur_c1208_72	5A	497268115
LR	wsnp_Ku_c15816_24541162	5A	497920018
LR	Ra_c700_2210	5A	498153826
LR	GENE-3314_78	5A	499084341
LR	Excalibur_c6567_845	5A	500095911
LR	RAC875_c28819_281	5A	500429102
LR	BobWhite_c5457_1440	5A	500429401
LR	BS00011102_51	5A	506797673
LR	BS00023076_51	5A	520563737
LR	JD_c5000_410	5A	522415116
LR	Jagger_c6106_119	5A	535720279
LR	Kukri_c14889_1086	5A	535829928
LR	Tdurum_contig11060_433	5A	539881645
LR	RAC875_c42356_237	5A	541122403
LR	RAC875_c19099_434	5A	541183370
LR	wsnp_Ra_c27733_37249132	5A	544788055
LR	Ex_c21738_1175	5A	544789548
LR	Kukri_c64573_443	5A	546419591
LR	Excalibur_c45894_552	5A	548003648
LR	BS00035256_51	5A	560479527
LR	Kukri_c6492_375	5A	563243390
LR	IAAV1311	5A	565011396
LR	BS00074876_51	5A	566754850
LR	BobWhite_c14028_182	5A	567074163
LR	Tdurum_contig36142_150	5A	568032378
LR	Ex_c4208_839	5A	568461607
LR	BobWhite_c48730_723	5A	568912462
LR	Tdurum_contig64587_107	5A	569326339
LR	Tdurum_contig28268_91	5A	569534911
LR	wsnp_Ex_c27046_36265198	5A	570069429
LR	Tdurum_contig56267_180	5A	570858333
LR	Excalibur_c79344_151	5A	570960547
LR	Ku_c19858_2078	5A	573016130
LR	Tdurum_contig86202_175	5A	573130330
LR	GENE-3601_145	5A	575530099
LR	RAC875_c11404_610	5A	578676567
LR	Ra_c7619_526	5A	579585427
LR	RAC875_c30566_230	5A	580158773
LR	Excalibur_c23354_306	5A	583630864
LR	wsnp_BF293620A_Ta_2_1	5A	583808886
LR	Kukri_c6669_145	5A	584138397
LR	wsnp_Ex_c621_1231444	5A	586389873
LR	Tdurum_contig50175_875	5A	589514417
LR	BS00041063_51	5A	590110597
LR	JD_c15758_288	5A	590512536
LR	wsnp_Ra_c3966_7286546	5A	591595445
LR	Ku_c12469_983	5A	591626386
LR	Excalibur_c49550_97	5A	592815919
LR	wsnp_CAP11_c1506_840938	5A	605216110
LR	Excalibur_c57920_54	5A	609033537
LR	BS00042336_51	5A	609433908
LR	Kukri_c55310_94	5A	625748708
LR	BS00104432_51	5A	628313122
LR	wsnp_Ex_c16295_24772663	5A	649564138
LR	GENE-2725_217	5A	658135903
LR	wsnp_Ex_c12684_20157261	5A	666262465
LR	BobWhite_rep_c63332_67	5A	670506048
LR	Tdurum_contig42962_2138	5A	672763755
LR	wsnp_Ex_c3136_5798185	5A	677672391
LR	RAC875_c8642_231	5A	690119901
LR	Tdurum_contig8348_831	5A	691459339
LR	Kukri_c16087_281	5A	692888699
LR	wsnp_BE638137B_Ta_2_2	5A	693410688
LR	BS00021860_51	5A	695442990
LR	Tdurum_contig12204_1131	5A	695690518
LR	Ra_c2139_968	5B	6558129
LR	Excalibur_c32189_998	5B	7367436
LR	BS00102828_51	5B	7376509
LR	Tdurum_contig14130_315	5B	9409980
LR	wsnp_Ex_c831_1625061	5B	9490753
LR	wsnp_Ex_c2459_4591587	5B	11336219
LR	wsnp_Ku_rep_c103274_90057407	5B	11595195
LR	Tdurum_contig8695_379	5B	12855775
LR	wsnp_JD_rep_c48937_33188230	5B	14546427
LR	wsnp_Ex_rep_c110196_92676847	5B	16184139
LR	Kukri_rep_c109397_59	5B	19370456
LR	wsnp_Ex_c58091_59534826	5B	19947921
LR	Kukri_c10970_573	5B	20430865
LR	BS00063804_51	5B	21218054
LR	CAP8_c909_312	5B	25032726
LR	RAC875_rep_c116173_605	5B	34914833
LR	wsnp_Ex_c214_421541	5B	41964746
LR	Excalibur_c32422_152	5B	43351116
LR	Ku_c7740_879	5B	49257566
LR	Ex_c2571_987	5B	56661738
LR	wsnp_Ex_c10842_17637744	5B	65003075
LR	RAC875_c51478_173	5B	91242483
LR	RAC875_c96137_101	5B	110627303
LR	RAC875_c7123_1703	5B	256310577
LR	BobWhite_c36054_53	5B	287121003
LR	wsnp_Ex_c48257_53217539	5B	337113276
LR	JG_c1889_344	5B	338310805
LR	wsnp_Ex_c12909_20457407	5B	338316316
LR	wsnp_Ex_c5632_9904112	5B	369736384
LR	TA001494-0485	5B	375800440
LR	Tdurum_contig12540_72	5B	383373944
LR	Excalibur_c50887_231	5B	391761387
LR	BS00022652_51	5B	392107905
LR	BS00056147_51	5B	398034540
LR	RAC875_c29431_1849	5B	405924266
LR	BS00108062_51	5B	406887269
LR	BS00048572_51	5B	407804464
LR	BS00068390_51	5B	410208260
LR	RAC875_rep_c72023_267	5B	411356441
LR	IACX6007	5B	413981611
LR	BS00023161_51	5B	415928767
LR	IAAV5873	5B	422046761
LR	BS00009789_51	5B	422185718
LR	wsnp_BE497820B_Ta_2_1	5B	422186700
LR	Kukri_c49151_139	5B	425228452
LR	tplb0033f11_1381	5B	426770246
LR	BS00063423_51	5B	430680126
LR	BS00023081_51	5B	436280473
LR	IAAV4074	5B	439028427
LR	wsnp_Ku_c3869_7094615	5B	446811179
LR	GENE-3440_199	5B	452708610
LR	BS00031411_51	5B	461780847
LR	wsnp_Ex_c16963_25554152	5B	461784373
LR	BobWhite_c47103_205	5B	463432938
LR	RAC875_c9150_2945	5B	465826499
LR	Tdurum_contig10911_117	5B	466778670
LR	Kukri_c40046_237	5B	466916075
LR	BS00022993_51	5B	466918314
LR	wsnp_Ex_c20440_29511162	5B	467738443
LR	wsnp_Ex_c974_1864971	5B	478918787
LR	BobWhite_rep_c63648_306	5B	479624174
LR	wsnp_Ex_rep_c102070_87317290	5B	482374376
LR	wsnp_Ex_c50413_54706626	5B	482534523
LR	Ku_c1083_1261	5B	483902360
LR	wsnp_Ex_c19724_28721128	5B	484045289
LR	RAC875_c23775_406	5B	489935706
LR	Kukri_c62247_248	5B	492230378
LR	CAP12_rep_c4520_207	5B	493569782
LR	Jagger_c3991_101	5B	494894619
LR	BobWhite_c11861_557	5B	512747429
LR	BS00098821_51	5B	513098137
LR	BobWhite_rep_c50822_462	5B	514002135
LR	RAC875_c27959_117	5B	515184439
LR	RAC875_rep_c76630_63	5B	518596916
LR	BS00022063_51	5B	518845325
LR	IAAV6818	5B	521099470
LR	RAC875_c19099_308	5B	524561737
LR	BS00042014_51	5B	525925096
LR	CAP7_c1155_57	5B	526258342
LR	Ex_c5594_2818	5B	526267462
LR	RFL_Contig2304_1569	5B	533682612
LR	Excalibur_c7968_2218	5B	540087068
LR	BS00075815_51	5B	542718477
LR	wsnp_Ku_c3201_5970486	5B	544456187
LR	Ex_c2264_817	5B	545477007
LR	Excalibur_c17055_1451	5B	547545279
LR	Tdurum_contig25513_123	5B	552263933
LR	Kukri_c94990_140	5B	553831143
LR	IAAV2426	5B	555899460
LR	BS00099782_51	5B	555970614
LR	Excalibur_c56310_57	5B	555989533
LR	RAC875_c8757_589	5B	556006400
LR	BS00049083_51	5B	556085740
LR	CAP12_c703_150	5B	556148387
LR	Tdurum_contig10210_425	5B	556522599
LR	RAC875_c23289_303	5B	556637578
LR	Tdurum_contig63997_587	5B	556637601
LR	Ex_c29928_1020	5B	556773322
LR	BS00068805_51	5B	557373209
LR	BS00021971_51	5B	557602724
LR	Excalibur_c45297_316	5B	559330468
LR	BS00029869_51	5B	560193805
LR	wsnp_Ra_c2105_4092507	5B	560996162
LR	Kukri_c4818_332	5B	562924524
LR	BS00068711_51	5B	563873988
LR	BS00068710_51	5B	563874058
LR	wsnp_Ex_c5155_9140608	5B	564415494
LR	BS00010311_51	5B	568951760
LR	Tdurum_contig42008_7461	5B	573188205
LR	Excalibur_c18492_249	5B	573381313
LR	IACX6034	5B	577183665
LR	BS00062731_51	5B	577864108
LR	Tdurum_contig27797_654	5B	578650350
LR	BS00011514_51	5B	578841610
LR	wsnp_Ex_rep_c66689_65010988	5B	578884546
LR	wsnp_Ra_c20970_30293078	5B	583532053
LR	Kukri_rep_c108378_52	5B	589219714
LR	BS00079321_51	5B	593627236
LR	Tdurum_contig98569_290	5B	595296032
LR	RAC875_rep_c104919_902	5B	597610346
LR	BS00021735_51	5B	599984328
LR	IACX6070	5B	606644972
LR	BS00041911_51	5B	607447453
LR	BS00066039_51	5B	607459593
LR	Kukri_rep_c70662_486	5B	609694843
LR	Tdurum_contig47833_484	5B	610262321
LR	RFL_Contig2772_1693	5B	612044364
LR	BS00110474_51	5B	619452486
LR	BobWhite_c22036_399	5B	623842776
LR	Tdurum_contig50731_961	5B	624358285
LR	BobWhite_c22572_782	5B	624825108
LR	Tdurum_contig51422_127	5B	627982478
LR	BS00015015_51	5B	628008163
LR	BS00049548_51	5B	628582623
LR	BS00037103_51	5B	629226888
LR	Tdurum_contig24416_284	5B	629473862
LR	BS00049997_51	5B	631113387
LR	BS00064947_51	5B	633155543
LR	RAC875_c48052_127	5B	638418331
LR	BS00100708_51	5B	640254664
LR	wsnp_Ex_c8019_13598348	5B	644839873
LR	wsnp_Ku_c1075_2160065	5B	647505635
LR	Tdurum_contig97407_196	5B	647522444
LR	BobWhite_c11038_605	5B	654147947
LR	BS00021868_51	5B	655968469
LR	Kukri_c4096_220	5B	660107828
LR	Kukri_c41408_233	5B	686693763
LR	Tdurum_contig97942_163	5B	695270738
LR	BS00097030_51	5B	695485915
LR	BobWhite_c24484_240	5B	697175585
LR	BS00099729_51	5B	697435689
LR	RAC875_c82589_246	5B	698119978
LR	CAP7_c8713_356	5B	699355626
LR	IACX5914	5B	700148605
LR	RAC875_rep_c74271_414	5B	700779788
LR	RFL_Contig3285_1009	5B	701101703
LR	Excalibur_c24511_1196	5B	701289425
LR	RAC875_rep_c106589_784	5B	707285754
LR	Excalibur_c71602_591	5B	710532782
LR	RAC875_c37988_243	5B	711812257
LR	BS00071573_51	6A	1600044
LR	wsnp_Ex_c431_848310	6A	4288064
LR	Excalibur_c20597_538	6A	5746644
LR	Excalibur_c20597_509	6A	5746673
LR	Tdurum_contig56431_637	6A	7139649
LR	BobWhite_c3714_659	6A	7139900
LR	Tdurum_contig54957_624	6A	8331426
LR	BS00025560_51	6A	8521181
LR	BobWhite_c22086_444	6A	8529327
LR	wsnp_Ex_c9779_16145653	6A	9174612
LR	Tdurum_contig29823_203	6A	10589921
LR	wsnp_Ex_c3530_6459532	6A	11611330
LR	RAC875_rep_c97032_73	6A	11612608
LR	RAC875_c2253_238	6A	14464393
LR	tplb0060j17_1091	6A	15302039
LR	BS00022951_51	6A	16454526
LR	IACX7895	6A	20129295
LR	Excalibur_c23748_452	6A	20460655
LR	CAP12_c2800_262	6A	21493979
LR	RAC875_rep_c72491_171	6A	22490173
LR	Excalibur_c35324_183	6A	25312858
LR	CAP7_rep_c8019_110	6A	27162662
LR	IAAV4117	6A	29830953
LR	wsnp_Ex_c31149_39976103	6A	31971514
LR	RAC875_c34617_143	6A	33969282
LR	BobWhite_c62620_150	6A	36901091
LR	Jagger_c2853_75	6A	49957543
LR	BS00031178_51	6A	49967449
LR	Tdurum_contig50698_601	6A	50679549
LR	wsnp_BE490604A_Ta_2_1	6A	51117497
LR	wsnp_Ex_c12141_19415226	6A	60303722
LR	BS00023847_51	6A	60327640
LR	tplb0052b07_577	6A	61188013
LR	RAC875_c31973_225	6A	64392415
LR	Excalibur_c38928_307	6A	66593498
LR	wsnp_Ex_c99215_85409445	6A	71389633
LR	Ku_c14907_456	6A	72489672
LR	wsnp_Ex_c3472_6358437	6A	74829276
LR	RAC875_rep_c114561_587	6A	76380742
LR	IAAV1820	6A	83853753
LR	wsnp_Ex_rep_c67878_66584488	6A	84621833
LR	tplb0028p11_1104	6A	90612851
LR	Tdurum_contig54967_581	6A	92488213
LR	wsnp_Ex_c25505_34771897	6A	97008610
LR	Ku_c8125_1049	6A	112090712
LR	IACX4889	6A	432713663
LR	IACX203	6A	441908720
LR	GENE-4154_365	6A	500907582
LR	wsnp_RFL_Contig4668_5551137	6A	518341671
LR	BS00037006_51	6A	522694667
LR	wsnp_Ex_c8741_14630167	6A	524932365
LR	wsnp_JD_rep_c48797_33040150	6A	524932406
LR	IACX3586	6A	536177440
LR	IACX6046	6A	537973588
LR	wsnp_Ku_c3450_6387847	6A	545684451
LR	CAP12_c118_95	6A	555033124
LR	Excalibur_c2834_397	6A	555165997
LR	wsnp_Ex_c51820_55631560	6A	564840357
LR	IAAV5761	6A	567860128
LR	BS00040166_51	6A	572278350
LR	IAAV151	6A	574246131
LR	BS00099074_51	6A	596071036
LR	wsnp_Ra_c11651_18855691	6A	603206262
LR	Kukri_rep_c112678_555	6A	605264573
LR	BS00067339_51	6A	608330439
LR	Kukri_c1468_1609	6A	608783808
LR	Excalibur_rep_c90454_251	6A	609064443
LR	Kukri_c13912_1543	6A	609800897
LR	BobWhite_c10832_1131	6A	610561353
LR	wsnp_Ex_c1153_2213588	6A	611914261
LR	BS00011578_51	6A	612007857
LR	Kukri_c37301_385	6A	612817096
LR	BobWhite_c27364_124	6A	615349261
LR	RFL_Contig1060_2185	6A	615349890
LR	Kukri_c64223_135	6A	617864018
LR	BS00011962_51	6A	617887217
LR	BS00078124_51	6A	620337399
LR	RAC875_c8254_249	6A	620593504
LR	Tdurum_contig93104_520	6A	621390226
LR	Excalibur_c96134_182	6B	5812964
LR	BS00072387_51	6B	5816080
LR	Tdurum_contig61178_618	6B	5816647
LR	BobWhite_c18566_106	6B	5816962
LR	wsnp_JD_c11061_11602784	6B	16928960
LR	Kukri_c6364_1243	6B	17206212
LR	Excalibur_c50559_622	6B	17551726
LR	BobWhite_c15802_720	6B	19982680
LR	RAC875_c2253_1255	6B	28366873
LR	IAAV1711	6B	31588045
LR	BobWhite_c4014_508	6B	36234417
LR	Kukri_c11106_439	6B	39006935
LR	Tdurum_contig9612_971	6B	39190720
LR	RFL_Contig5693_646	6B	39190981
LR	Kukri_c264_438	6B	51434544
LR	wsnp_Ex_c19082_27999258	6B	61477137
LR	Excalibur_c36725_96	6B	63961665
LR	IAAV7349	6B	64846436
LR	BS00067590_51	6B	76996661
LR	BS00049843_51	6B	109735364
LR	Kukri_c19338_413	6B	120052713
LR	Ku_c30637_1294	6B	122734464
LR	wsnp_Ra_rep_c108218_91556581	6B	126513816
LR	RFL_Contig5166_1049	6B	138651692
LR	wsnp_BE488206B_Ta_2_1	6B	138997260
LR	wsnp_Ex_c34962_43193869	6B	143325173
LR	BS00003214_51	6B	148556271
LR	RFL_Contig5844_291	6B	150159542
LR	Excalibur_c36771_136	6B	151402127
LR	Kukri_c14191_351	6B	153580402
LR	Tdurum_contig11126_182	6B	154294103
LR	BS00046963_51	6B	155284443
LR	Kukri_c39321_112	6B	155687581
LR	Tdurum_contig51676_120	6B	155690074
LR	Excalibur_c3795_198	6B	159405106
LR	RAC875_c14852_2171	6B	159406664
LR	BobWhite_rep_c65994_267	6B	159569607
LR	RAC875_c20889_913	6B	160612356
LR	Kukri_c28165_906	6B	162449151
LR	wsnp_Ex_rep_c66552_64838102	6B	163154095
LR	BS00058774_51	6B	168701412
LR	Excalibur_c11605_156	6B	169350294
LR	BS00076397_51	6B	169665495
LR	Tdurum_contig70639_196	6B	176694870
LR	wsnp_Ra_c57648_59682822	6B	185854784
LR	Excalibur_c11588_406	6B	188948912
LR	Jagger_c555_287	6B	196810876
LR	RAC875_c43581_280	6B	204198335
LR	BS00025302_51	6B	204872079
LR	Ra_c10469_616	6B	207070837
LR	RAC875_c22101_656	6B	207918264
LR	BobWhite_c17750_568	6B	212072767
LR	BS00076093_51	6B	224409518
LR	wsnp_Ex_c11873_19047792	6B	234003828
LR	Kukri_c44940_117	6B	274163404
LR	IACX8190	6B	293440454
LR	wsnp_Ex_rep_c101703_87021883	6B	325325284
LR	wsnp_Ra_c11600_18784716	6B	395450874
LR	Kukri_c61725_545	6B	401989099
LR	BS00080317_51	6B	422036346
LR	RAC875_c63209_154	6B	423762521
LR	BS00049942_51	6B	437800328
LR	Kukri_c50603_164	6B	439184808
LR	TA005016-0827	6B	442540695
LR	Tdurum_contig29294_171	6B	443751568
LR	wsnp_BF293311B_Ta_2_3	6B	444645162
LR	wsnp_Ex_c34011_42398362	6B	444647071
LR	BS00054287_51	6B	444680503
LR	BobWhite_c11301_226	6B	444709322
LR	Kukri_c7539_1065	6B	453708297
LR	BS00090277_51	6B	455170272
LR	RAC875_c48456_444	6B	455170286
LR	GENE-0363_168	6B	455203971
LR	wsnp_Ex_c26172_35422935	6B	455275226
LR	Kukri_c77911_260	6B	455508556
LR	Ex_c1145_552	6B	455517505
LR	Kukri_c377_2164	6B	455518143
LR	BS00048191_51	6B	464135780
LR	BS00040380_51	6B	464257039
LR	RAC875_c20775_540	6B	467978385
LR	BS00073906_51	6B	471775027
LR	GENE-3945_245	6B	522579477
LR	Tdurum_contig15762_139	6B	536645133
LR	Excalibur_c41490_397	6B	555978789
LR	Tdurum_contig51613_821	6B	566279091
LR	Tdurum_contig55473_221	6B	567063545
LR	TA005615-0600	6B	568466829
LR	wsnp_Ex_c11348_18326158	6B	579577389
LR	RAC875_c2370_250	6B	589484233
LR	Kukri_c65887_282	6B	600379366
LR	Kukri_rep_c73457_419	6B	601571515
LR	Excalibur_c89155_115	6B	606719092
LR	BobWhite_c22827_193	6B	618074316
LR	CAP7_c7065_166	6B	629177799
LR	BS00028997_51	6B	629651879
LR	RAC875_c6649_642	6B	630482837
LR	Tdurum_contig76997_664	6B	630796955
LR	wsnp_BQ171182B_Ta_1_1	6B	637669132
LR	BS00010993_51	6B	646818052
LR	Tdurum_contig46808_4106	6B	652221813
LR	BobWhite_c1633_643	6B	653038059
LR	wsnp_Ex_c12674_20142989	6B	653050273
LR	Kukri_c58961_76	6B	653305535
LR	Tdurum_contig51640_847	6B	657218275
LR	tplb0021a17_853	6B	660997483
LR	BS00109999_51	6B	662297012
LR	Tdurum_contig32579_121	6B	663174718
LR	RFL_Contig5037_1482	6B	663215978
LR	RFL_Contig2206_1694	6B	672336303
LR	Ex_c17379_1431	6B	674252389
LR	wsnp_Ku_c4910_8793327	6B	675547210
LR	BS00068245_51	6B	678192064
LR	wsnp_Ex_c9038_15058264	6B	680327664
LR	wsnp_Ex_c9038_15058444	6B	680327844
LR	Excalibur_c6108_394	6B	684602785
LR	Kukri_c60966_261	6B	686953716
LR	Tdurum_contig44130_228	6B	689232413
LR	BS00046263_51	6B	689527661
LR	BS00032519_51	6B	689915884
LR	Excalibur_c20459_1081	6B	689916225
LR	wsnp_Ex_rep_c69373_68312188	6B	689919768
LR	RFL_Contig4069_2628	6B	690846747
LR	RAC875_c5413_1431	6B	694246811
LR	RAC875_rep_c112449_669	6B	694348520
LR	BobWhite_c23771_525	6B	694348662
LR	RAC875_c45987_132	6B	695963590
LR	wsnp_Ex_c19525_28494827	6B	696050600
LR	Kukri_c14511_511	6B	696577218
LR	Excalibur_c29748_954	6B	696649131
LR	wsnp_CAP8_rep_c4776_2319078	6B	699672078
LR	Tdurum_contig8030_335	6B	700121784
LR	BobWhite_c12261_130	6B	701138670
LR	tplb0050d17_1401	6B	703064038
LR	Excalibur_c17447_635	7A	567254
LR	IAAV6250	7A	795449
LR	Excalibur_c20311_388	7A	1127125
LR	Tdurum_contig51001_186	7A	2235808
LR	Tdurum_contig42590_317	7A	2728158
LR	Tdurum_contig81608_63	7A	2916084
LR	BS00095826_51	7A	2916587
LR	GENE-4923_84	7A	4032922
LR	BS00087471_51	7A	5602098
LR	TA003860-0675	7A	5708905
LR	BS00091701_51	7A	5936485
LR	Excalibur_c24593_1217	7A	6189728
LR	RAC875_c22210_191	7A	7053839
LR	RAC875_c346_1226	7A	7595075
LR	RAC875_c22233_83	7A	7793891
LR	RAC875_c48202_231	7A	8784751
LR	GENE-4592_541	7A	9396346
LR	Kukri_c74599_85	7A	10645021
LR	BS00068863_51	7A	10804824
LR	BS00082268_51	7A	12422453
LR	BS00001921_51	7A	12430682
LR	Tdurum_contig93663_457	7A	14418509
LR	Kukri_c32980_552	7A	17312086
LR	Tdurum_contig47309_600	7A	18151984
LR	RAC875_c63822_185	7A	20575399
LR	RAC875_c52124_90	7A	20585979
LR	wsnp_BG313770A_Ta_2_3	7A	24317303
LR	Kukri_c34887_734	7A	27294129
LR	Tdurum_contig16632_288	7A	34855341
LR	Ex_c9615_574	7A	45450608
LR	IAAV5150	7A	45465717
LR	BS00007429_51	7A	56333448
LR	Tdurum_contig51645_738	7A	62289789
LR	Tdurum_contig82510_574	7A	71186316
LR	BS00074230_51	7A	77686300
LR	BS00040929_51	7A	78811042
LR	Tdurum_contig99143_205	7A	80133431
LR	Kukri_c96054_123	7A	80528902
LR	Kukri_c5757_530	7A	88058989
LR	RAC875_c7988_1588	7A	95351036
LR	TA004831-0260	7A	103963967
LR	wsnp_Ex_c5341_9443380	7A	106589384
LR	wsnp_Ku_c6065_10682577	7A	107505741
LR	RAC875_c67063_703	7A	109617182
LR	BS00070624_51	7A	112880433
LR	IACX481	7A	114510717
LR	BS00022475_51	7A	119687771
LR	BS00070642_51	7A	124466041
LR	BS00070735_51	7A	124467148
LR	IAAV5154	7A	126050065
LR	BS00101427_51	7A	131722927
LR	BobWhite_c8366_563	7A	136231406
LR	Tdurum_contig13431_127	7A	136236667
LR	Tdurum_contig45062_417	7A	148271520
LR	Tdurum_contig4676_3592	7A	154928669
LR	BS00065789_51	7A	160165731
LR	BS00017187_51	7A	163513086
LR	BS00044040_51	7A	173936487
LR	RFL_Contig2540_306	7A	225445947
LR	BobWhite_c911_127	7A	239168958
LR	Excalibur_c62090_277	7A	264699993
LR	wsnp_Ex_c398_784427	7A	444599702
LR	RAC875_c57962_101	7A	499156856
LR	BS00006674_51	7A	508134272
LR	wsnp_Ex_c558_1105911	7A	510658794
LR	Kukri_rep_c97425_164	7A	511660763
LR	CAP8_c8768_51	7A	515882486
LR	wsnp_Ex_c7216_12391182	7A	517652869
LR	BS00080365_51	7A	534628632
LR	Ra_c18741_604	7A	537541809
LR	Kukri_c66328_222	7A	542077571
LR	BS00040992_51	7A	564522395
LR	wsnp_Ra_c7969_13600474	7A	565319877
LR	CAP7_c10038_214	7A	567909865
LR	wsnp_Ex_c40011_47158369	7A	574639659
LR	wsnp_RFL_Contig1510_707132	7A	592766775
LR	wsnp_Ex_c19582_28564743	7A	605192975
LR	Excalibur_c96483_520	7A	606617975
LR	Kukri_rep_c105157_485	7A	607610143
LR	Tdurum_contig22364_380	7A	607785417
LR	BS00078324_51	7A	613232278
LR	RAC875_c57656_170	7A	615522425
LR	Tdurum_contig93270_1008	7A	632573482
LR	Tdurum_contig56175_791	7A	637245741
LR	wsnp_BM134363A_Ta_2_4	7A	637850433
LR	BobWhite_c5235_710	7A	639958353
LR	BS00066295_51	7A	652735030
LR	RAC875_c37085_317	7A	665839113
LR	tplb0045p11_893	7A	670586999
LR	wsnp_Ku_rep_c103889_90513052	7A	675159175
LR	wsnp_Ku_c44760_51961180	7A	685328701
LR	BS00010809_51	7A	687602318
LR	GENE-4442_121	7A	688476552
LR	wsnp_Ex_c9971_16412615	7A	694424596
LR	wsnp_RFL_Contig2805_2579582	7A	696606527
LR	Kukri_rep_c98227_230	7A	696703094
LR	Excalibur_c52115_233	7A	701051947
LR	Kukri_c10757_183	7A	701083249
LR	Kukri_c5693_1983	7A	701661119
LR	wsnp_Ex_c31955_40681185	7A	707364116
LR	IACX5767	7A	708733945
LR	wsnp_Ex_c5839_10246812	7A	709578037
LR	Kukri_rep_c68381_911	7A	709628081
LR	BS00027226_51	7A	710688835
LR	Ku_c43151_811	7A	710717056
LR	BS00061911_51	7A	715507046
LR	wsnp_Ku_c28104_38042857	7A	716336393
LR	wsnp_BF483039A_Ta_2_1	7A	718764847
LR	Excalibur_rep_c71107_517	7A	719664573
LR	BS00022137_51	7A	721057704
LR	BobWhite_c43557_103	7A	722925739
LR	RAC875_c34939_963	7A	722926230
LR	Tdurum_contig46717_2021	7A	722926856
LR	BS00075731_51	7A	723743964
LR	RFL_Contig6075_618	7B	657882
LR	Excalibur_c53111_215	7B	1663403
LR	Kukri_c46310_84	7B	1666302
LR	Kukri_rep_c71778_644	7B	1666792
LR	BobWhite_c47269_128	7B	5202062
LR	Tdurum_contig5352_556	7B	6365396
LR	Tdurum_contig85266_280	7B	7798169
LR	IAAV6833	7B	8001542
LR	BS00081132_51	7B	15203771
LR	BobWhite_c44404_312	7B	21473396
LR	Tdurum_contig66398_976	7B	27762059
LR	Ku_c12701_1268	7B	32566063
LR	BobWhite_c36693_210	7B	37024226
LR	RAC875_c46751_112	7B	39991068
LR	wsnp_Ex_c10342_16938528	7B	45042249
LR	Kukri_rep_c108469_158	7B	45044884
LR	wsnp_Ex_c9813_16193780	7B	45045766
LR	Kukri_c24895_522	7B	45622802
LR	BS00054881_51	7B	48575270
LR	BS00064344_51	7B	48813659
LR	Kukri_rep_c72909_657	7B	50258610
LR	Tdurum_contig46877_488	7B	50847689
LR	Kukri_rep_c69164_94	7B	57247911
LR	BobWhite_c39364_231	7B	58134532
LR	BobWhite_c4481_96	7B	61815045
LR	Ku_c665_985	7B	62277280
LR	Jagger_c2161_211	7B	63278593
LR	BobWhite_c23074_304	7B	65551601
LR	Tdurum_contig32954_195	7B	76972238
LR	BS00036788_51	7B	83276587
LR	GENE-4273_67	7B	85649459
LR	Excalibur_c59263_96	7B	86977199
LR	IAAV3038	7B	104718678
LR	BobWhite_c46772_564	7B	117123267
LR	GENE-4333_211	7B	118018339
LR	Tdurum_contig51087_573	7B	124773609
LR	wsnp_Ex_rep_c66351_64532511	7B	133645232
LR	Ku_c1839_202	7B	146004249
LR	IAAV3646	7B	149895084
LR	Kukri_c57677_355	7B	171121264
LR	BS00031611_51	7B	178787660
LR	wsnp_Ex_c14248_22204549	7B	185373419
LR	RAC875_c99084_580	7B	188545308
LR	Kukri_c36710_1007	7B	194581189
LR	Ku_c17257_926	7B	204662640
LR	Tdurum_contig44382_932	7B	207269330
LR	BS00067540_51	7B	212537090
LR	RAC875_rep_c70874_1920	7B	214990476
LR	Excalibur_rep_c116920_300	7B	234507175
LR	RAC875_c61456_317	7B	283994697
LR	Tdurum_contig30403_411	7B	360741197
LR	RAC875_c9715_679	7B	414700202
LR	Kukri_c31305_75	7B	433246568
LR	GENE-2677_330	7B	451618073
LR	Ku_c4522_1221	7B	460565560
LR	Excalibur_c15029_144	7B	501801982
LR	Excalibur_rep_c102136_270	7B	502558806
LR	BobWhite_c36268_275	7B	518286360
LR	IAAV2921	7B	538613773
LR	GENE-4270_242	7B	553828926
LR	BS00021972_51	7B	562791920
LR	RAC875_c8890_148	7B	577583427
LR	Tdurum_contig23024_763	7B	586834218
LR	Kukri_c38676_278	7B	602749440
LR	Kukri_c4143_869	7B	603972080
LR	BobWhite_c3541_152	7B	614661401
LR	RAC875_c4834_694	7B	622004626
LR	RAC875_c27548_234	7B	631850542
LR	BS00068310_51	7B	633304971
LR	Kukri_c25451_119	7B	651670687
LR	wsnp_Ku_c854_1768346	7B	652777969
LR	BS00063744_51	7B	652814012
LR	RAC875_c48766_224	7B	654347361
LR	BS00080621_51	7B	657174659
LR	Kukri_rep_c103094_177	7B	662014473
LR	Kukri_c15912_1189	7B	682066703
LR	IAAV8521	7B	687638572
LR	RAC875_c41903_122	7B	695390626
LR	Kukri_c10430_1138	7B	705652153
LR	Tdurum_contig17697_771	7B	705856657
LR	Excalibur_c888_1609	7B	706074699
LR	wsnp_BF202806B_Ta_2_1	7B	707238227
LR	Tdurum_contig17062_221	7B	707701562
LR	BS00083578_51	7B	707820071
LR	Excalibur_c3698_739	7B	707935553
LR	wsnp_Ex_c8400_14157060	7B	708526290
LR	wsnp_Ex_c8400_14157318	7B	708526547
LR	Kukri_c55780_296	7B	713245498
LR	RAC875_c55351_223	7B	717719030
LR	BS00035234_51	7B	717725850
LR	CAP12_c1587_142	7B	718204553
LR	BobWhite_c30930_192	7B	720519233
LR	wsnp_Ex_c3930_7127883	7B	730641082
LR	Kukri_c4352_318	7B	737799370
LR	BS00042111_51	7B	744948279
LR	RFL_Contig3607_648	7B	749218177
LR	BS00075569_51	7B	750744853
LR	RAC875_c906_657	7B	754153689
OC	GENE-0002_856	1A	34081569
OC	wsnp_Ex_c2181_4089788	1A	66922076
OC	wsnp_Ex_c11697_18821490	1A	239632966
OC	RFL_Contig5450_993	1A	309438231
OC	CAP8_c2843_226	1A	358234482
OC	Excalibur_c47013_1503	1A	535824089
OC	BobWhite_c20073_382	1A	584479982
OC	Tdurum_contig56188_569	1B	26807811
OC	wsnp_Ex_c12012_19240904	1B	46695456
OC	wsnp_Ex_c11976_19193550	1B	111182248
OC	BS00075036_51	1B	305855494
OC	BobWhite_c1488_504	1B	398033752
OC	wsnp_Ex_c22006_31180883	1B	456080705
OC	Ex_c12584_2014	1B	457281872
OC	Ku_c3647_1443	1B	550040966
OC	TA002402-1350	1B	571848972
OC	BS00003816_51	1B	596113048
OC	RAC875_rep_c112310_481	1B	682863475
OC	CAP8_rep_c8022_270	2A	33508142
OC	BS00011425_51	2A	33576489
OC	BS00004724_51	2A	35692519
OC	Ra_c1257_2455	2A	444383289
OC	Excalibur_c47219_820	2A	704431897
OC	BS00025880_51	2A	743764492
OC	RAC875_c35200_230	2A	752146500
OC	Tdurum_contig10048_447	2A	756134228
OC	RAC875_rep_c115433_378	2B	7007561
OC	Kukri_c40204_617	2B	7838914
OC	BS00109330_51	2B	19845386
OC	Tdurum_contig28712_225	2B	24113408
OC	Excalibur_rep_c68899_1400	2B	98439404
OC	TA006136-0595	2B	104910833
OC	BobWhite_c23953_312	2B	216778956
OC	Ku_c70277_1276	2B	367720575
OC	GENE-1213_138	2B	500194030
OC	BobWhite_c26981_66	2B	561701035
OC	TA001163-0861	2B	715910136
OC	Kukri_c29052_75	2B	746544272
OC	RAC875_c27530_860	2B	773018546
OC	Kukri_c17_943	2B	786948239
OC	tplb0062k24_584	3A	14291732
OC	Jagger_c2707_152	3A	433396103
OC	GENE-3343_183	3A	563018441
OC	wsnp_Ex_rep_c66685_65003254	3A	567573727
OC	BS00107444_51	3A	567967756
OC	RFL_Contig1456_1130	3B	43203634
OC	BobWhite_c10402_140	3B	108480833
OC	RAC875_c13895_763	3B	524575927
OC	wsnp_Ex_c7756_13218814	3B	592483583
OC	wsnp_Ku_c23041_32923608	3B	705808491
OC	RAC875_c43185_1332	3B	742626483
OC	RAC875_c1377_428	4A	17597227
OC	Ku_c766_2284	4A	27783651
OC	wsnp_Ex_rep_c67799_66488792	4A	80396373
OC	Ex_c5979_1449	4A	461916841
OC	BobWhite_rep_c63429_271	4A	563670294
OC	wsnp_Ku_rep_c68565_67614479	4A	586994238
OC	CAP12_c2972_140	4A	678224498
OC	RAC875_rep_c71112_400	4A	678577784
OC	Excalibur_rep_c79414_306	4B	13186275
OC	BobWhite_c7260_197	4B	525620509
OC	Excalibur_c39876_403	4B	654854007
OC	wsnp_Ku_c10515_17368422	4B	657220852
OC	wsnp_Ex_c31830_40573624	5A	21733864
OC	BS00067886_51	5A	215341415
OC	wsnp_RFL_Contig4136_4696148	5A	355632916
OC	tplb0041o08_752	5A	389585317
OC	BS00084580_51	5A	392615137
OC	BS00022761_51	5A	523916820
OC	BS00065292_51	5A	551173049
OC	RAC875_c42281_112	5A	563401479
OC	Kukri_c96249_58	5A	564564684
OC	CAP11_c3209_76	5A	587256186
OC	BobWhite_c42349_99	5A	657993954
OC	Kukri_c49033_52	5A	669176472
OC	Tdurum_contig54689_646	5A	677049849
OC	Kukri_rep_c78644_408	5A	680002717
OC	wsnp_Ra_rep_c106477_90236168	5B	55788524
OC	Excalibur_c60683_908	5B	379331577
OC	Jagger_c5915_58	5B	436190684
OC	Ex_c66350_301	5B	440404779
OC	wsnp_Ex_c16963_25554152	5B	461784373
OC	IAAV2577	6A	9173147
OC	RAC875_c64593_117	6A	26335282
OC	CAP7_c1326_220	6A	36085867
OC	IACX170	6A	155736946
OC	Kukri_c78348_266	6A	582190122
OC	wsnp_Ku_c25376_35340294	6A	582355314
OC	wsnp_BF483091A_Ta_2_5	6A	602523402
OC	RAC875_c15525_271	6A	604928942
OC	Excalibur_rep_c69054_795	6A	609801901
OC	BobWhite_rep_c65565_359	6A	615495692
OC	Excalibur_s111479_146	6B	83444899
OC	RAC875_c76124_264	6B	120383724
OC	Kukri_c21943_958	6B	128736921
OC	wsnp_Ex_c45081_50974769	6B	143505287
OC	wsnp_BF291478B_Ta_2_1	6B	240760184
OC	wsnp_Ex_c6401_11124462	6B	460136544
OC	Kukri_c53506_1141	6B	462258098
OC	Jagger_c1077_98	6B	540900785
OC	RAC875_c57261_265	6B	596503347
OC	RAC875_c23461_428	6B	652224509
OC	wsnp_BM137835D_Ta_2_3	6B	682797194
OC	RAC875_c31299_1302	6B	689915469
OC	BobWhite_rep_c49991_177	6B	693162039
OC	TA005876-0602	6B	698233239
OC	tplb0057f21_914	7A	1099825
OC	wsnp_Ex_c2017_3787478	7A	71196860
OC	BS00063555_51	7A	71812435
OC	BS00003726_51	7A	109617271
OC	Tdurum_contig63598_188	7A	112872216
OC	BS00041232_51	7A	143068356
OC	Kukri_c58950_69	7A	573853199
OC	wsnp_RFL_Contig3405_3533915	7A	591299845
OC	wsnp_CAP7_c949_486485	7A	613354392
OC	RAC875_c22201_461	7A	620150340
OC	wsnp_Ex_c5177_9174930	7A	622103020
OC	RAC875_c20121_561	7A	652870817
OC	Kukri_c29396_58	7A	686128761
OC	wsnp_Ex_c11658_18773086	7B	7349187
OC	TA002254-0660	7B	67954515
OC	wsnp_be496863B_Ta_2_1	7B	72192954
OC	wsnp_Ex_c7783_13259751	7B	171291799
OC	Excalibur_c16687_476	7B	491701758
OC	BobWhite_rep_c63008_468	7B	510491373
OC	wsnp_Ex_c4804_8579139	7B	522593580
OC	Kukri_c39759_102	7B	542938246
OC	Excalibur_rep_c111629_239	7B	559792054
OC	Kukri_c100592_82	7B	656256942
OC	wsnp_Ex_c16577_25095267	7B	734184695
OC	Tdurum_contig8448_363	7B	739054968
OC	D_F5XZDLF01CK3P1_55	7B	753283269
MC	RAC875_c34888_65	1A	10707719
MC	BS00077350_51	1A	11052152
MC	Excalibur_c10689_254	1A	25612698
MC	wsnp_CAP11_c1043_618449	1A	39351687
MC	Tdurum_contig37488_126	1A	43403261
MC	wsnp_Ex_c8364_14095508	1A	340550674
MC	IACX293	1A	376857708
MC	RAC875_c12808_182	1A	383873180
MC	RFL_Contig530_2305	1A	426326790
MC	IACX18883	1A	467243635
MC	BobWhite_c38865_319	1A	467708290
MC	BS00087600_51	1A	484190582
MC	IAAV5535	1A	499103437
MC	IACX3047	1A	499286585
MC	BS00089894_51	1A	500341790
MC	RAC875_rep_c112044_340	1A	501638837
MC	TA003955-1138	1A	502441185
MC	wsnp_BE445113A_Ta_2_1	1A	503852292
MC	Ku_c67089_214	1A	506158336
MC	wsnp_Ra_c11877_19161832	1A	507120245
MC	RAC875_c37545_289	1A	508119253
MC	Kukri_c29039_315	1A	508504313
MC	wsnp_BM140362A_Ta_2_2	1A	509907486
MC	RAC875_c32452_55	1A	516886283
MC	GENE-0487_795	1A	524025460
MC	GENE-0487_644	1A	524025656
MC	Jagger_c5542_100	1A	525192076
MC	BS00012042_51	1A	533155697
MC	BS00110130_51	1A	533726274
MC	Tdurum_contig96086_74	1A	541793503
MC	IACX14	1A	543352031
MC	BobWhite_rep_c49755_131	1A	549412908
MC	wsnp_Ex_rep_c67098_65573819	1A	553583124
MC	Excalibur_c66_147	1A	572226995
MC	TA002215-1444	1A	576387085
MC	BobWhite_rep_c50057_164	1A	579617382
MC	GENE-0514_210	1A	579738826
MC	BS00065170_51	1A	582636662
MC	BS00011292_51	1A	583588592
MC	RAC875_c39312_339	1A	587692859
MC	BS00076192_51	1B	1847434
MC	Excalibur_c21898_1423	1B	2233594
MC	Kukri_c44369_131	1B	2234916
MC	BS00093078_51	1B	2401305
MC	BS00022505_51	1B	7032179
MC	Tdurum_contig28703_293	1B	7642467
MC	Kukri_c8390_1515	1B	8294890
MC	Kukri_c44392_212	1B	11172057
MC	Kukri_c76307_182	1B	14071440
MC	Excalibur_c44883_244	1B	14824860
MC	BS00004418_51	1B	40730741
MC	RAC875_c1825_188	1B	41908074
MC	BS00064085_51	1B	91203495
MC	Excalibur_c7954_672	1B	118716857
MC	RAC875_c8849_134	1B	124589423
MC	Kukri_c42522_155	1B	138124660
MC	BS00022687_51	1B	350708974
MC	BS00101500_51	1B	363870647
MC	Kukri_c38105_452	1B	466345959
MC	BobWhite_c33506_732	1B	486350003
MC	Ra_c37969_549	1B	500310012
MC	BobWhite_rep_c49207_243	1B	504834879
MC	Kukri_c60564_136	1B	517678709
MC	IACX11029	1B	536850565
MC	BobWhite_c10977_834	1B	553453558
MC	RAC875_c4135_1782	1B	556976241
MC	Ku_c18920_414	1B	562068396
MC	wsnp_Ex_c13109_20725640	1B	572835856
MC	Kukri_rep_c103469_126	1B	574442437
MC	tplb0036b21_694	1B	583476347
MC	Tdurum_contig42423_1536	1B	605446927
MC	IAAV7172	1B	617460637
MC	BS00067024_51	1B	627704165
MC	wsnp_BE494527B_Ta_2_1	1B	628572646
MC	BS00039135_51	1B	642445118
MC	Excalibur_c8585_701	1B	650744422
MC	BS00068077_51	1B	655297033
MC	Tdurum_contig8840_575	1B	656607280
MC	BS00078414_51	1B	665466972
MC	BS00084990_51	1B	675004511
MC	wsnp_CAP11_c2596_1325540	1B	676345823
MC	Excalibur_c27873_266	1B	676511624
MC	BobWhite_c20073_443	1B	679793005
MC	Kukri_rep_c69177_180	2A	11403009
MC	BS00093990_51	2A	27717506
MC	BS00004724_51	2A	35692519
MC	BS00022982_51	2A	36060208
MC	Excalibur_c12135_100	2A	65798354
MC	Excalibur_c21269_176	2A	97424964
MC	Kukri_c45411_223	2A	101597120
MC	Kukri_c45015_145	2A	120603226
MC	Kukri_c44442_274	2A	127098833
MC	Excalibur_rep_c107523_281	2A	168949417
MC	Kukri_c15489_626	2A	499841254
MC	wsnp_Ex_c31900_40635609	2A	499841325
MC	wsnp_Ex_rep_c66800_65171259	2A	500123496
MC	BS00062756_51	2A	550245180
MC	Excalibur_c47535_389	2A	597763683
MC	GENE-4029_80	2A	617274483
MC	RAC875_c35521_185	2A	668984100
MC	BS00070005_51	2A	668996474
MC	BS00039188_51	2A	670555690
MC	GENE-1125_32	2A	671683696
MC	BS00083497_51	2A	694596436
MC	Excalibur_rep_c102052_721	2A	698560531
MC	wsnp_Ex_rep_c66358_64543401	2A	702672181
MC	BS00080751_51	2A	711379310
MC	Excalibur_c57590_187	2A	715395367
MC	RAC875_rep_c107961_348	2A	720599290
MC	RAC875_c29913_139	2A	728179249
MC	RAC875_c33037_578	2A	734705753
MC	BS00063236_51	2A	739711955
MC	RAC875_c96399_610	2A	750727497
MC	Tdurum_contig53038_714	2A	750759995
MC	CAP8_c3129_381	2A	752410885
MC	BS00009692_51	2A	755562192
MC	Excalibur_c29417_400	2B	2123844
MC	tplb0034e07_1869	2B	3306703
MC	Kukri_c1175_1577	2B	8181029
MC	Excalibur_c32668_467	2B	11323404
MC	RAC875_c31358_214	2B	39563223
MC	Kukri_c28478_750	2B	45924280
MC	wsnp_BM140364B_Ta_2_1	2B	121500417
MC	RFL_Contig1633_304	2B	136821654
MC	wsnp_Ex_c6537_11338763	2B	138099593
MC	BS00059315_51	2B	144429428
MC	Excalibur_c15031_73	2B	144931062
MC	GENE-4359_102	2B	150122047
MC	Kukri_c6973_344	2B	159800078
MC	wsnp_Ex_c62844_62315607	2B	169763290
MC	GENE-0689_776	2B	357269535
MC	GENE-0689_791	2B	357269546
MC	TA002695-2341	2B	383143230
MC	Excalibur_c29707_318	2B	414136408
MC	Tdurum_contig100733_89	2B	448065723
MC	BS00100563_51	2B	563614728
MC	wsnp_Ex_c114_230248	2B	578171873
MC	wsnp_BE490267A_Ta_2_1	2B	585385537
MC	RAC875_c14775_1048	2B	598877770
MC	RAC875_rep_c113120_326	2B	627889454
MC	RAC875_rep_c118667_79	2B	679960953
MC	Tdurum_contig12879_1200	2B	708090071
MC	Tdurum_contig56876_365	2B	722468782
MC	Kukri_rep_c68903_301	2B	726088811
MC	wsnp_CAP7_c317_172502	2B	726865483
MC	BobWhite_c6365_965	2B	728069802
MC	Tdurum_contig28980_211	2B	738853726
MC	Ku_c3479_1035	2B	740927002
MC	Excalibur_c8720_1073	2B	743440715
MC	CAP11_c2941_210	2B	749681499
MC	Excalibur_c9752_619	2B	759299893
MC	BS00106695_51	2B	765546492
MC	Ex_c52711_584	2B	773012762
MC	IACX11305	2B	776301010
MC	Excalibur_c48404_59	2B	789949279
MC	RAC875_c36922_829	3A	5410038
MC	Excalibur_rep_c69004_1008	3A	13676814
MC	RAC875_c43871_154	3A	15423902
MC	TA001885-0568	3A	20097192
MC	RFL_Contig1896_1236	3A	24050011
MC	BS00057445_51	3A	24434735
MC	RAC875_c19534_68	3A	43263961
MC	wsnp_Ku_c40218_48484410	3A	64967841
MC	wsnp_CAP11_c2438_1258747	3A	478486140
MC	wsnp_Ku_c3343_6206887	3A	509357017
MC	Excalibur_c18089_1116	3A	554662426
MC	TA004228-0191	3A	562609279
MC	RAC875_c28384_413	3A	570548562
MC	BS00074617_51	3A	616586051
MC	BS00061179_51	3A	621802782
MC	RAC875_c47550_437	3A	649536542
MC	BobWhite_c17879_519	3A	654759243
MC	Excalibur_c39808_453	3A	679428518
MC	Excalibur_c24829_189	3A	724225532
MC	RAC875_c99055_69	3A	732088989
MC	IAAV2423	3A	736180943
MC	Tdurum_contig49804_392	3B	4197036
MC	BS00079989_51	3B	7663455
MC	BS00092492_51	3B	55508629
MC	BobWhite_rep_c55395_200	3B	55893256
MC	Kukri_c54571_224	3B	66274923
MC	Tdurum_contig100403_128	3B	126890001
MC	Tdurum_contig43263_243	3B	147985655
MC	RAC875_c45678_1083	3B	149352151
MC	Excalibur_c9001_569	3B	361314888
MC	wsnp_Ku_c26257_36216869	3B	480355421
MC	Kukri_c4074_463	3B	483845301
MC	RAC875_rep_c71248_689	3B	568473735
MC	RAC875_c65882_668	3B	577953363
MC	wsnp_Ex_c2314_4333242	3B	581528712
MC	Excalibur_rep_c69241_274	3B	598924252
MC	Kukri_c46302_194	3B	620408748
MC	Excalibur_c43822_370	3B	659745706
MC	BS00067748_51	3B	673731297
MC	wsnp_Ex_c8715_14590273	3B	684752125
MC	wsnp_BQ167580B_Ta_2_1	3B	699546699
MC	GENE-1549_110	3B	704557758
MC	RAC875_c24047_284	3B	749326395
MC	wsnp_Ex_c57007_58898157	3B	755357942
MC	Kukri_c66862_96	3B	759810360
MC	BS00038349_51	3B	762690377
MC	Kukri_c31523_367	3B	784353932
MC	RAC875_c61934_406	3B	824636111
MC	BobWhite_c45118_495	3B	831048940
MC	BS00091257_51	3B	834649443
MC	BS00073411_51	3B	835777845
MC	BS00035307_51	2BA	3988989
MC	Tdurum_contig48049_807	2BA	37993770
MC	IAAV3697	2BA	38546443
MC	wsnp_Ex_c5690_9994334	2BA	38924878
MC	wsnp_Ex_c6320_11003591	2BA	42229625
MC	Excalibur_c32366_122	2BA	533609609
MC	IAAV4351	2BA	586990550
MC	wsnp_Ku_rep_c68565_67614479	2BA	586994238
MC	BS00072025_51	2BA	597083322
MC	Excalibur_c687_961	2BA	613840150
MC	RAC875_c56535_256	2BA	617438854
MC	BS00059503_51	2BA	629409038
MC	RAC875_rep_c109207_706	2BA	658789723
MC	TA004912-0408	2BA	674497048
MC	Excalibur_rep_c115261_135	2BA	674609394
MC	CAP8_rep_c3781_99	2BA	677545742
MC	BS00093289_51	2BA	698960843
MC	BobWhite_rep_c66361_594	2BA	715175771
MC	RAC875_c67909_226	2BA	715775645
MC	Kukri_c1488_1122	2BA	724355594
MC	CAP12_rep_c4571_181	4B	11639988
MC	wsnp_Ex_c30695_39579408	4B	19641887
MC	BS00102182_51	4B	59249179
MC	BS00075746_51	4B	96705637
MC	RAC875_c36614_344	4B	155903394
MC	RAC875_c45747_87	4B	164751195
MC	BS00066271_51	4B	184210819
MC	Kukri_c9693_1890	4B	263448147
MC	Tdurum_contig29989_132	4B	363661488
MC	BobWhite_c20051_53	4B	455252058
MC	wsnp_Ex_c5769_10136788	4B	536290586
MC	CAP8_c1408_167	4B	585267765
MC	BS00057153_51	4B	615026705
MC	RAC875_c1357_860	4B	615202807
MC	IACX938	4B	616895738
MC	BobWhite_c27751_95	4B	625472228
MC	BS00081335_51	4B	641341046
MC	Kukri_c32958_390	4B	641371696
MC	wsnp_Ex_c26285_35531324	4B	642791342
MC	wsnp_Ex_c26285_35531535	4B	642791553
MC	tplb0027f12_503	4B	643061320
MC	Kukri_c33550_601	4B	661036469
MC	wsnp_Ex_c905_1748920	5A	2918810
MC	BS00094095_51	5A	27665261
MC	Excalibur_c94962_57	5A	32122488
MC	BS00066188_51	5A	433245705
MC	Kukri_rep_c104877_2166	5A	474678544
MC	RAC875_c101391_521	5A	520991666
MC	BS00049135_51	5A	530257676
MC	RAC875_c42356_237	5A	541122403
MC	Excalibur_c45894_552	5A	548003648
MC	BS00065551_51	5A	552150936
MC	wsnp_BE399939A_Ta_2_1	5A	552303456
MC	BobWhite_c48730_723	5A	568912462
MC	BS00065481_51	5A	576568225
MC	BS00074855_51	5A	605213919
MC	BobWhite_rep_c64315_180	5A	608865003
MC	BobWhite_c14486_122	5A	610881727
MC	wsnp_BG607308A_Ta_2_2	5A	612217119
MC	Ku_c21235_676	5A	613450696
MC	Excalibur_c37565_709	5A	652885441
MC	Kukri_c86812_193	5A	655896265
MC	GENE-2725_217	5A	658135903
MC	Kukri_c49033_52	5A	669176472
MC	wsnp_Ex_c2332_4371926	5A	669746811
MC	BS00065714_51	5A	682830482
MC	Kukri_c16087_281	5A	692888699
MC	RAC875_c15745_124	5B	1851633
MC	Ku_c10387_272	5B	3115731
MC	RAC875_c400_1363	5B	15645055
MC	BS00022107_51	5B	34293859
MC	Tdurum_contig25068_259	5B	50180098
MC	BobWhite_c4852_323	5B	74085346
MC	wsnp_Ex_c12909_20457407	5B	338316316
MC	RAC875_rep_c72023_267	5B	411356441
MC	Tdurum_contig100344_160	5B	466571312
MC	wsnp_RFL_Contig2220_1597321	5B	481940892
MC	Kukri_c63163_141	5B	496945896
MC	IAAV6818	5B	521099470
MC	Excalibur_rep_c104876_277	5B	536866044
MC	wsnp_Ex_c8659_14515623	5B	551313546
MC	Excalibur_c63208_105	5B	562563551
MC	Tdurum_contig27797_654	5B	578650350
MC	IACX5390	5B	600810891
MC	Tdurum_contig70554_1004	5B	610338875
MC	BS00099367_51	5B	612350084
MC	Ra_c6374_1984	5B	662326443
MC	BS00039874_51	5B	674676557
MC	BobWhite_c26082_239	5B	687467478
MC	Kukri_c10913_480	5B	701531271
MC	RAC875_c18094_69	5B	703615509
MC	Kukri_c11737_1241	6A	801860
MC	Kukri_c34036_229	6A	1071502
MC	RAC875_c13610_1239	6A	1211696
MC	Excalibur_c20597_538	6A	5746644
MC	Ra_c6065_1145	6A	8528764
MC	Excalibur_c5442_1691	6A	14465362
MC	GENE-2561_69	6A	114982580
MC	tplb0057m18_546	6A	295766992
MC	IAAV622	6A	498815294
MC	BS00073872_51	6A	531476278
MC	BobWhite_c2568_115	6A	535277128
MC	GENE-4086_659	6A	570646620
MC	BobWhite_c2296_94	6A	603305183
MC	BS00017018_51	6A	607936158
MC	tplb0031m24_341	6A	608717041
MC	IAAV6637	6A	609802980
MC	Excalibur_rep_c106566_371	6B	7724416
MC	wsnp_Ex_c7191_12352173	6B	17077676
MC	Excalibur_s102388_276	6B	17206488
MC	Tdurum_contig54917_597	6B	31581689
MC	wsnp_Ku_c8343_14190318	6B	46002955
MC	Excalibur_c99745_169	6B	54650823
MC	Excalibur_c35713_106	6B	55347368
MC	BobWhite_c31011_102	6B	84599430
MC	RAC875_c17559_3102	6B	120052990
MC	TA012984-0128	6B	165554062
MC	wsnp_Ex_c16243_24699942	6B	233305153
MC	Kukri_c3983_670	6B	265906696
MC	RAC875_c41604_1001	6B	330143623
MC	BS00090277_51	6B	455170272
MC	RAC875_c48456_444	6B	455170286
MC	wsnp_Ex_c14101_22012676	6B	487503612
MC	tplb0061e06_1431	6B	525398694
MC	Tdurum_contig26001_242	6B	526457265
MC	Tdurum_contig93283_513	6B	547735509
MC	wsnp_Ku_c15761_24469459	6B	555174548
MC	BS00066605_51	6B	561641505
MC	RAC875_c43780_239	6B	581143277
MC	Tdurum_contig26016_243	6B	582257881
MC	wsnp_Ex_c18372_27196625	6B	600554006
MC	BS00037464_51	6B	650288297
MC	wsnp_Ex_rep_c110800_93013978	6B	678193202
MC	Kukri_c41482_311	6B	688241512
MC	BS00032519_51	6B	689915884
MC	Excalibur_c20311_388	7A	1127125
MC	RAC875_c56907_274	7A	5271377
MC	BobWhite_c14495_230	7A	10643906
MC	RFL_Contig3841_2595	7A	16215169
MC	wsnp_Ku_c4615_8326355	7A	26073300
MC	RAC875_c61824_194	7A	35711880
MC	IAAV7916	7A	75185437
MC	BS00110010_51	7A	75194660
MC	Excalibur_c13337_219	7A	75915140
MC	BS00063267_51	7A	78591978
MC	BS00046976_51	7A	86460993
MC	wsnp_Ex_c5341_9443380	7A	106589384
MC	GENE-4791_286	7A	157449790
MC	BobWhite_c911_127	7A	239168958
MC	GENE-3132_118	7A	254174021
MC	BS00073125_51	7A	373894272
MC	RFL_Contig3590_811	7A	517012809
MC	wsnp_Ex_c1924_3630249	7A	579707164
MC	wsnp_RFL_Contig4018_4483983	7A	622176214
MC	BS00077891_51	7A	643169852
MC	RAC875_c20121_561	7A	652870817
MC	Excalibur_c25630_537	7A	677305244
MC	RAC875_c2359_652	7A	686128852
MC	wsnp_Ex_c9971_16412615	7A	694424596
MC	RAC875_c4682_646	7A	695922016
MC	Excalibur_rep_c105674_315	7A	705323660
MC	BobWhite_c25527_133	7A	709628519
MC	Excalibur_c6101_608	7A	713516619
MC	wsnp_BE445506A_Ta_2_1	7A	716386051
MC	IACX6478	7A	722930902
MC	Kukri_c637_974	7B	1724359
MC	Excalibur_c8486_419	7B	2610829
MC	Excalibur_c3423_1170	7B	8001159
MC	IAAV6833	7B	8001542
MC	Tdurum_contig67693_344	7B	11098363
MC	Tdurum_contig27634_93	7B	38575720
MC	Kukri_c14766_484	7B	66319385
MC	RAC875_c53629_760	7B	111162611
MC	wsnp_Ku_c11060_18147688	7B	119625169
MC	Kukri_c36710_1007	7B	194581189
MC	BS00067280_51	7B	198228620
MC	IAAV7925	7B	245221411
MC	Ra_c64159_441	7B	290215458
MC	Ku_c4522_1221	7B	460565560
MC	Ra_c27275_627	7B	585252473
MC	BS00022610_51	7B	603963444
MC	BS00022045_51	7B	632006429
MC	RAC875_c21489_908	7B	643349812
MC	IACX486	7B	643765799
MC	RAC875_c40569_716	7B	695379721
MC	RAC875_c66376_395	7B	700805728
MC	wsnp_BF202806B_Ta_2_1	7B	707238227
MC	Kukri_c11959_587	7B	707691733
MC	BobWhite_c12048_145	7B	707804461
MC	Ku_c9679_441	7B	709946620
MC	Kukri_c28160_2017	7B	722614968
MC	Kukri_rep_c69740_288	7B	722620695
MC	BobWhite_c12355_1548	7B	724416551
MC	BS00023069_51	7B	747110558
MC	RAC875_c22831_356	7B	748593036

## Sheet: TableS3
Table S3. FST values between sub-populations in the hypothesis of 3, 5 and 16 clusters (K) detected by ADMIXTURE.
	K = 3			K = 5					K = 16
	P1	P2	P3	P1a	P1b	P2a	P2b	P3	G1	G2	G3	G4	G5	G6	G7	G8	G9	G10	G11	G12	G13	G14	G15	G16
P1		0.186376	0.206972
P2	0.186376		0.193619
P3	0.206972	0.193619
P1a					0.208939	0.215671	0.272686	0.240626
P1b				0.208939		0.36339	0.367887	0.301083
P2a				0.215671	0.36339		0.270293	0.277116
P2b				0.272686	0.367887	0.270293		0.194888
P3				0.240626	0.301083	0.277116	0.194888
G1										0.232524	0.409266	0.445347	0.562474	0.548366	0.4843	0.477768	0.451643	0.45934	0.375797	0.450758	0.394677	0.375447	0.524978	0.42605
G2									0.232524		0.39155	0.401161	0.53189	0.502514	0.47896	0.447437	0.433876	0.444113	0.383307	0.450136	0.403413	0.371458	0.510665	0.377983
G3									0.409266	0.39155		0.580132	0.692095	0.693325	0.565042	0.597052	0.534539	0.569961	0.463472	0.542463	0.493566	0.47169	0.627714	0.550381
G4									0.445347	0.401161	0.580132		0.74769	0.726449	0.669172	0.553845	0.540565	0.573981	0.489502	0.549424	0.524094	0.469535	0.655199	0.564508
G5									0.562474	0.53189	0.692095	0.74769		0.826826	0.785026	0.761026	0.69437	0.69929	0.548416	0.634889	0.603779	0.562643	0.745838	0.700226
G6									0.548366	0.502514	0.693325	0.726449	0.826826		0.757175	0.760088	0.696949	0.704299	0.592599	0.655763	0.634661	0.601485	0.751777	0.707138
G7									0.4843	0.47896	0.565042	0.669172	0.785026	0.757175		0.673674	0.431147	0.600388	0.481115	0.569727	0.516582	0.516256	0.668986	0.614586
G8									0.477768	0.447437	0.597052	0.553845	0.761026	0.760088	0.673674		0.425757	0.465021	0.464249	0.548036	0.493018	0.437141	0.632227	0.514157
G9									0.451643	0.433876	0.534539	0.540565	0.69437	0.696949	0.431147	0.425757		0.382142	0.404064	0.482289	0.436694	0.400864	0.573553	0.465582
G10									0.45934	0.444113	0.569961	0.573981	0.69929	0.704299	0.600388	0.465021	0.382142		0.345766	0.400427	0.370927	0.320923	0.518032	0.450243
G11									0.375797	0.383307	0.463472	0.489502	0.548416	0.592599	0.481115	0.464249	0.404064	0.345766		0.321379	0.196759	0.204886	0.365972	0.366454
G12									0.450758	0.450136	0.542463	0.549424	0.634889	0.655763	0.569727	0.548036	0.482289	0.400427	0.321379		0.233802	0.248351	0.302161	0.422933
G13									0.394677	0.403413	0.493566	0.524094	0.603779	0.634661	0.516582	0.493018	0.436694	0.370927	0.196759	0.233802		0.229608	0.367598	0.378747
G14									0.375447	0.371458	0.47169	0.469535	0.562643	0.601485	0.516256	0.437141	0.400864	0.320923	0.204886	0.248351	0.229608		0.350778	0.305032
G15									0.524978	0.510665	0.627714	0.655199	0.745838	0.751777	0.668986	0.632227	0.573553	0.518032	0.365972	0.302161	0.367598	0.350778		0.521154
G16									0.42605	0.377983	0.550381	0.564508	0.700226	0.707138	0.614586	0.514157	0.465582	0.450243	0.366454	0.422933	0.378747	0.305032	0.521154

## Sheet: Table S4
Table S4. R2 statistic estimated for each pair of SNPs to investigate the LD decay within each sub-population (LR, OC, MC) sampled at 41 accessions, the entire population (n. 123) and LR and MC at 85 and 133 accessions, respectively. The Tukey-Kramer test was applied to check possible differences among average r2 values. Different letters indicate significantly different means.
Physical_distance	LD	1A	1B	2A	2B	3A	3B	4A	4B	5A	5B	6A	6B	7A	7B	intra_chr	inter_chr	Tukey_Kramer HSD*
	LR (41)	0.0585425	0.0605927	0.0598741	0.0501991	0.0787812	0.0499101	0.0543185	0.0590651	0.0587986	0.0553551	0.0577914	0.0543055	0.0547305	0.0585536	0.0562906	0.0441564	B
	OC (41)	0.091771	0.0887968	0.0617632	0.082018	0.0891955	0.0698326	0.0707851	0.067541	0.0850642	0.072793	0.0964932	0.0710563	0.0651761	0.07511	0.0782889	0.0634588	A
	MC (41)	0.0672917	0.0575491	0.0685552	0.0703126	0.0792835	0.0581454	0.0524364	0.0734336	0.0585007	0.0636588	0.0653992	0.0574064	0.0500372	0.0484607	0.0608139	0.0380989	B
	Whole collection (123)	0.0309668	0.0295893	0.0326714	0.026564	0.0348925	0.0244091	0.0253308	0.0321378	0.0306414	0.0308341	0.0332026	0.02465	0.0241473	0.0235066	0.0281883	0.0162159	D
	LR (85)	0.0449686	0.0446146	0.0511627	0.0355629	0.0629764	0.0378795	0.0408452	0.0451678	0.0434352	0.0425657	0.0403016	0.0397903	0.0460882	0.0408628	0.0424328	0.0314545	C
	MC (133)	0.0400737	0.0358255	0.0438696	0.0385287	0.0482115	0.0385171	0.033403	0.0439186	0.0399139	0.0444275	0.0412649	0.0340008	0.0296429	0.0285962	0.0376652	0.0182668	C
*Different letters indicate significantly different means

## Sheet: Table S5
Table S5	Divergent SNP loci detected by pairwise comparisons between the sub-populations LR, OC and MC using FST (> 0.25). SNP ID, SNP name, physical position on Zavitan (chromosome and bp), physical position on Svevo (chromosome and bp), genetic position on tetraploid consensus map (cM), and overlapping genes/QTL within these regions.
Population	Marker_ID	Marker	Chr Zavitan	Position Zavitan (bp)	Chr Svevo	Position Svevo (bp)	cM Consensus	FST values	Transcript_ID (Zavitan genome)	Symbol (Zavitan genome)	Gene/QTL	Reference
LR vs MC
	IWA6644	wsnp_Ku_c1818_3557408	1A	3072872	1A	4122180	2.8	0.309002	TRIDC1AG000320.15	Protein MEI2-like 3
	IWB13355	CAP12_c3074_192	1A	4258494	1A	4902350	4.1	0.328865	TRIDC1AG000880.1	Protein of unknown function (DUF 3339)
	IWB56511	RAC875_c30657_82	1A	6542081	1A	7132185	#N/A	0.347879	TRIDC1AG001230.1	Leucine-rich repeat receptor-like protein kinase family protein	Glu-A3 / Pm3	Anvi et al. 2017
	IWB7039	BS00022355_51	1A	6940513	1A	7640070	#N/A	0.348324	TRIDC1AG001430.6	methionine S-methyltransferase
	IWB71461	Tdurum_contig43943_1165	1A	9126954	1A	10134341	10.8	0.38591	TRIDC1AG002060.3	actin 7
	IWA4754	wsnp_Ex_c7965_13520238	1A	11057188	n.c.	n.c.	15.8	0.551483	TRIDC1AG002650.13	Protein kinase superfamily protein
	IWB47064	Kukri_c63336_621	1A	33143692	1A	27946970		0.423826	TRIDC1AG006610.3	undescribed protein
	IWB28131	Excalibur_c6255_1119	1A	156958361	1A	152822081	46.2	0.47846	TRIDC1AG018440.6	Receptor-like protein kinase
	IWB68771	Tdurum_contig19102_84	1A	280796407	1A	273664169	#N/A	0.268788	TRIDC1AG023960.17	Amino-terminal region of chorein, A TM vesicle-mediated sorter
	IWB65334	TA001042-0912	1A	302768013	1A	294875270	47.8	0.33944	TRIDC1AG025700.3	Calcium uniporter protein 2, mitochondrial
	IWB11667	BS00090634_51	1A	321930002	1A	313880940	#N/A	0.429599	TRIDC1AG027080.2	Protein BPS1, chloroplastic
	IWB12984	CAP11_c6014_160	1A	nu	1A	358935523	50.4	0.5466	TRIDC1AG030790.6	Chitinase family protein
	IWB60861	RAC875_c86680_391	1A	467274229	1A	456807575	62.8	0.385354	TRIDC1AG040300.5	Subtilisin-like protease SBT3.17
	IWB35927	IACX3496	1A	473397696	1A	463441708	67.7	0.575953	TRIDC1AG041070.2	ferredoxin 3
	IWB43491	Kukri_c27785_400	1A	481780220	1A	471745295	70.5	0.381857	TRIDC1AG041940.11	Gamma-glutamyl phosphate reductase
	IWB10042	BS00067420_51	1A	482795712	1A	472637407	70.7	0.489208	TRIDC1AG042170.9	Tetratricopeptide repeat (TPR)-like superfamily protein
	IWB11516	BS00087601_51	1A	484190750	1A	474028503	70.8	0.422535	TRIDC1AG042430.3	ATP-dependent zinc metalloprotease FtsH
	IWB7216	BS00022698_51	1A	484855332	1A	474649237	70.7	0.424018	TRIDC1AG042590.2	Chitinase 2
	IWB5807	BS00002216_51	1A	484861729	1A	474655218	70.8	0.484482	TRIDC1AG042600.4	Heat shock 70 kDa protein 3
	IWB56355	RAC875_c29540_413	1A	507117109	1A	496620309	78.1	0.329445	TRIDC1AG046480.3	undescribed protein
	IWB54285	RAC875_c16391_426	1A	511262897	1A	500702356	#N/A	0.272752	TRIDC1AG047240.5	unknown function
	IWB15063	CAP8_rep_c7343_88	1A	511616947	1B	548462539	#N/A	0.269452	TRIDC1AG047340.1	Glutenin, high molecular weight subunit 12
	IWB38369	Ku_c1313_1673	1A	516382360	1A	505746051	85.1	0.357979	TRIDC1AG048000.1	NB-ARC domain containing protein
	IWB54196	RAC875_c15975_1208	1A	532705756	1A	525526354	#N/A	0.276179	TRIDC1AG051390.1	undescribed protein
	IWB12579	BS00110627_51	1A	535340720	1A	527767957	99.8	0.420263	TRIDC1AG051920.3	Heavy metal transport/detoxification superfamily protein
	IWB29580	Excalibur_c97157_65	1A	538599439	1A	530978668	102.7	0.27622	TRIDC1AG052460.2	DNA-damage-repair/toleration protein (DRT102)
	IWB7430	BS00023114_51	1A	576853869	1A	569294750	132.7	0.310477	TRIDC1AG061880.1	undescribed protein
	IWA4897	wsnp_Ex_c9343_15514531	1A	577599073	1A	570040096	134.7	0.304262	TRIDC1AG062090.6	asparagine synthetase 3		Nigro et al. 2019
	IWB4839	BobWhite_rep_c50057_164	1A	579617382	n.c.	n.c.	150.9	0.273777	TRIDC1AG062480.1	undescribed protein
	IWB11788	BS00093078_51	1B	2401305	1B	2091030	#N/A	0.340779	TRIDC1BG000570.9	Pco110845
	IWB65373	TA001286-0611-w	1B	7511992	n.c.	n.c.	4.6	0.287618	TRIDC1BG001510.1	Leucine-rich receptor-like protein kinase family protein
	IWB47978	Kukri_c8390_1102	1B	8295417	1B	4925398	#N/A	0.31794	TRIDC1BG001670.6	Glucan 1,3-beta-glucosidase
	IWB29371	Excalibur_c9196_313	1B	12566388	1B	10777455	10.8	0.407847	TRIDC1BG002910.6	actin 7
	IWB12258	BS00105846_51	1B	14950118	1B	13971152	8.7	0.257839	TRIDC1BG003360.4	Transcription initiation factor IIA subunit 2
	IWB6457	BS00011695_51	1B	15261975	n.c.	n.c.	10.1	0.439768	TRIDC1BG003470.13	Protein kinase superfamily protein
	IWB14060	CAP7_c3847_204	1B	16400316	1B	15319952	12	0.364758	TRIDC1BG003930.2	RING/U-box superfamily protein
	IWB7167	BS00022590_51	1B	40730967	1B	33642910	#N/A	0.36467	TRIDC1BG006890.7	Coiled-coil domain-containing protein 130
	IWB60559	RAC875_c79370_378	1B	64121778	n.c.	n.c.	29.9	0.313823	TRIDC1BG010340.3	Pentatricopeptide repeat-containing protein
	IWB9190	BS00064085_51	1B	91203495	5B	654276568		0.361874	TRIDC1BG012670.3	undescribed protein
	IWB58936	RAC875_c53382_120	1B	291216505	1B	285102324	35.8	0.479653	TRIDC1BG027440.18	undescribed protein
	IWB51614	Ra_c26080_461	1B	303597303	4B	35028638		0.58786	TRIDC1BG028200.1	unknown function
	IWB55154	RAC875_c21274_235	1B	327331849	1B	315939077	36.9	0.257781	TRIDC1BG030050.7	TRAF-like family protein
	IWB31732	GENE-0193_197	1B	373812285	1B	360706881	43	0.282215	TRIDC1BG033960.12	U1 small nuclear ribonucleoprotein 70 kDa
	IWB7716	BS00029345_51	1B	387331812	1B	374030715	43.5	0.255231	TRIDC1BG035190.8	Glycerol-3-phosphate acyltransferase, chloroplastic	QFb.cerz-1BL.1	Roncallo et al. 2012
	IWB72647	Tdurum_contig59449_400	1B	493545058	1B	480261821	58.6	0.371728	TRIDC1BG045490.4	unknown function
	IWB31604	GENE-0004_635	1B	521068121	1B	508011223	#N/A	0.347879	TRIDC1BG048680.7	Metal tolerance protein 5
	IWB5360	BobWhite_rep_c63278_349	1B	524098719	1B	511074588		0.365638	TRIDC1BG049000.5	Ribosomal protein S12/S23 family protein
	IWB64848	RFL_Contig4977_2333	1B	540690063	1B	528329053	72	0.277787	TRIDC1BG050780.5	Transposon protein CACTA, En/Spm sub-class
	IWB60433	RAC875_c7674_634	1B	545386072	1B	532565353	74.1	0.263515	TRIDC1BG051360.16	MATE efflux family protein
	IWB47566	Kukri_c73734_175	1B	545873010	1B	533017052	74.1	0.330262	TRIDC1BG051420.7	myb-like transcription factor family protein
	IWB31788	GENE-0293_154	1B	554446413	7B	64943429	#N/A	0.260484	TRIDC1BG052750.2	unknown function
	IWB61131	RAC875_c95548_156	1B	556131573	1B	543552756	79.2	0.30488	TRIDC1BG052890.3	ubiquitin 13
	IWA4999	wsnp_Ex_rep_c101231_86636951	1B	560274667	1B	547806592	79.6	0.267124	TRIDC1BG053430.4	Translation initiation factor SUI1 family protein
	IWB11183	BS00081396_51	1B	561002592	1B	548457020	81.2	0.266736	TRIDC1BG053540.1	Glutenin, high molecular weight subunit 12
	IWA5160	wsnp_Ex_rep_c107911_91350930	1B	574442254	1B	562927434	86.9	0.302602	TRIDC1BG055360.5	FAR1-related sequence 3
	IWB26591	Excalibur_c44818_109	1B	607424078	1B	594948568	96.2	0.267327	TRIDC1BG059750.4	CASC3/Barentsz eIF4AIII binding
	IWB7290	BS00022851_51	1B	625786932	1B	614518928	106	0.382696	TRIDC1BG061840.2	undescribed protein
	IWB58356	RAC875_c47427_75	1B	630020926	1B	618264253	109	0.255797	TRIDC1BG062360.9	Hexosyltransferase
	IWB71777	Tdurum_contig47253_1624	1B	632329304	1B	620136958	110.8	0.277878	TRIDC1BG062650.14	AFG1-like ATPase family protein
	IWA4155	wsnp_Ex_c5296_9365860	1B	635076912	1B	622805863	114.8	0.29611	TRIDC1BG063400.4	1,2-dihydroxy-3-keto-5-methylthiopentene dioxygenase 4
	IWB11958	BS00096498_51	1B	637102074	1B	624674846	115.7	0.685269	TRIDC1BG063850.3	Guanine nucleotide-binding protein subunit beta-like protein A
	IWB36732	Jagger_c7235_96	1B	637102221	1B	624674993	115.4	0.378864	TRIDC1BG063850.3	Guanine nucleotide-binding protein subunit beta-like protein A
	IWB6947	BS00022176_51	1B	642433446	1B	631496806	117.4	0.294011	TRIDC1BG064830.2	Cathepsin B-like cysteine proteinase
	IWB11625	BS00089790_51	1B	643929510	1B	633135607	119.1	0.354765	TRIDC1BG065270.3	60S ribosomal protein L37a	HD-PC	Maccaferri et al. 2019
	IWB1371	BobWhite_c2027_215	1B	645487241	1B	635051753	121.4	0.29392	TRIDC1BG065590.3	unknown function
	IWB44899	Kukri_c39223_871	1B	645487808	1B	635052320	120.8	0.348512	TRIDC1BG065590.3	unknown function	PH-TKW -BR	Maccaferri et al. 2019
	IWB8409	BS00045568_51	1B	658372097	1B	647880338	136.1	0.286753	TRIDC1BG068070.1	PETER PAN-like protein	PH-NET-HD-PH	Maccaferri et al. 2019
	IWB34652	IAAV3040	1B	674363933	n.c.	n.c.	150.9	0.372382	TRIDC1BG071680.2	undescribed protein
	IWB71971	Tdurum_contig49509_606	1B	686384991	1B	677170065	162.5	0.383517	TRIDC1BG074080.21	Protein kinase superfamily protein	GY-HD-TKW-KNS	Maccaferri et al. 2019
	IWB59140	RAC875_c5577_1682	2A	4571402	2A	5160582	#N/A	0.362118	TRIDC2AG001410.9	Sterol 3-beta-glucosyltransferase
	IWB40869	Kukri_c12648_434	2A	21812275	2A	19697845	21.9	0.346715	TRIDC2AG005270.4	F-box family protein
	IWB28073	Excalibur_c61806_213	2A	52167383	2A	48500986	54.6	0.262731	TRIDC2AG011080.10	FAR1-related sequence 5
	IWB71778	Tdurum_contig47258_1039	2A	62208340	2A	58486368	67.5	0.322724	TRIDC2AG012850.6	potassium transporter 2
	IWB872	BobWhite_c1611_1685	2A	64231046	2A	60411691	#N/A	0.357796	TRIDC2AG013090.5	acyl-CoA dehydrogenase-related
	IWA5893	wsnp_JD_c18695_17091254	2A	75554041	2A	70547798	78	0.37445	TRIDC2AG014970.11	Phage shock protein A homolog
	IWB22047	Excalibur_c12169_1088	2A	85796452	2A	81739185	#N/A	0.260484	TRIDC2AG016980.4	chaperone protein dnaJ-related
	IWB70024	Tdurum_contig30451_88	2A	597900804	2A	597038819	121.3	0.4673	TRIDC2AG052100.3	F-box protein
	IWB26325	Excalibur_c42364_134	2A	602200141	2A	601411347		0.275531	TRIDC2AG052760.2	General transcription factor IIH subunit 2
	IWB25530	Excalibur_c34913_743	2A	617813318	2A	618210550	131.1	0.255746	TRIDC2AG055020.4	phenylalanine ammonia-lyase 2	BCH1 (CHYB1, HYD1) Carotenoid β-ring hydroxylase (β-hydroxylase 1)	Colasuonno et al. 2017
	IWB34603	IAAV2718	2A	674085358	2A	675832863	144	0.554728	TRIDC2AG061670.21	Protein strawberry notch homolog 1
	IWB32429	GENE-1381_110	2A	684186146	2A	685560391	145.9	0.346787	TRIDC2AG063240.5	Clathrin interactor EPSIN 1
	IWA200	wsnp_be471201A_Ta_1_1	2A	684188228	2A	685562439	145.8	0.496038	TRIDC2AG063240.6	Clathrin interactor EPSIN 1
	IWB55262	RAC875_c21906_247	2A	684729362	2A	686136741	#N/A	0.31794	TRIDC2AG063370.1	Wound-induced basic protein
	IWB2961	BobWhite_c3833_815	2A	686054164	2A	690225260	145.9	0.490767	TRIDC2AG063500.8	Protein kinase family protein
	IWB13648	CAP12_rep_c6956_169	2A	690377743	2A	691749827	146.5	0.443972	TRIDC2AG064000.9	PLATZ transcription factor family protein
	IWB11977	BS00096882_51	2A	694101919	2A	695410154	148	0.264857	TRIDC2AG064430.7	ABC transporter C family member 9
	IWB44999	Kukri_c40121_373	2A	697505186	2A	698938206	150.4	0.445404	TRIDC2AG065000.1	undescribed protein
	IWB7714	BS00029332_51	2A	698535712	2A	700013123	152.5	0.548106	TRIDC2AG065220.10	unknown function
	IWB49008	Kukri_rep_c104611_210	2A	702828329	2A	704410524	154.6	0.360863	TRIDC2AG065960.5	Disease resistance protein
	IWB53236	RAC875_c110838_165	2A	705639488	2A	706929197		0.412648	TRIDC2AG066500.2	unknown function	Polyphenol oxidase 1	Anvi et al. 2017
	IWB57860	RAC875_c42648_115	2A	709157028	2A	710367657	159.1	0.660635	TRIDC2AG067210.1	undescribed protein
	IWA4375	wsnp_Ex_c59095_60108185	2A	709489657	2A	710631852	158.7	0.634561	TRIDC2AG067360.1	Zinc finger BED domain-containing protein RICESLEEPER 1	HD-TKW-KNS	Maccaferri et al. 2019
	IWB11143	BS00080752_51	2A	711379344	2A	715768389	159.9	0.491798	TRIDC2AG067940.17	unknown function
	IWB11193	BS00081506_51	2A	711747350	2A	716162068	159.9	0.584236	TRIDC2AG068080.2	dihydroflavonol 4-reductase
	IWB28961	Excalibur_c80601_278	2A	716538329	2B	701102094		0.285649	TRIDC2AG069210.1	Protein transport protein SEC13 homolog B
	IWA1960	wsnp_Ex_c14953_23104041	2A	721812347	2A	726064385	169.3	0.384745	TRIDC2AG070190.2	Alpha-1,4-glucan-protein synthase [UDP-forming]
	IWA5959	wsnp_JD_c2578_3489735	2A	728474126	2A	732715789	176.5	0.261558	TRIDC2AG071750.3	Protein kinase superfamily protein
	IWB75255	tplb0060h04_139	2A	739313579	2A	743671308	186.1	0.281992	TRIDC2AG073780.2	undescribed protein
	IWB3440	BobWhite_c4517_120	2A	743825156	2A	748480207	189.8	0.368071	TRIDC2AG075240.1	undescribed protein
	IWB836	BobWhite_c15773_166	2A	744219155	2A	748648912	189.8	0.502534	TRIDC2AG075340.4	ubiquitin conjugating enzyme 9
	IWB61157	RAC875_c96399_610	2A	750727497	n.c.	n.c.	197.6	0.299468	TRIDC2AG076930.1	Pectinesterase	GS2-2A Glutamine synthetase	Nigro et al. 2019
	IWB66206	Tdurum_contig10048_447	2A	756134228	2A	760420202		0.366245	TRIDC2AG078330.20	Endonuclease MutS2
	IWA4491	wsnp_Ex_c63909_62932437	2A	773844194	2A	774813864	210.8	0.494733	TRIDC2AG082150.9	Acyl-CoA N-acyltransferase with RING/FYVE/PHD-type zinc finger protein
	IWB7407	BS00023068_51	2B	4779715	2B	7492031	6.6	0.271651	TRIDC2BG001290.9	AAR2 protein family
	IWB62322	RAC875_rep_c115433_378	2B	7007561	2B	9360474	7.9	0.572594	TRIDC2BG001590.1	von Willebrand factor D and EGF domain-containing protein
	IWB45010	Kukri_c40204_617	2B	7838914	2B	10002023	8.3	0.416803	TRIDC2BG001760.6	Integral membrane protein hemolysin-III homolog
	IWB8851	BS00061979_51	2B	15698996	2B	19752026	16.1	0.272818	TRIDC2BG003580.1	Disease resistance protein RGA2
	IWB2317	BobWhite_c2988_493	2B	31087081	2B	33368429	34	0.293734	TRIDC2BG006480.53	Protein kinase superfamily protein
	IWB20002	Ex_c17993_470	2B	39354332	3A	3455035		0.253431	TRIDC2BG007890.12	receptor-like protein kinase 4
	IWA7916	wsnp_Ra_c407_862316	2B	54659987	2B	52972480	44.2	0.286212	TRIDC2BG010430.14	NAD-dependent protein deacetylase
	IWA3868	wsnp_Ex_c4349_7841003	2B	58832750	2B	57179677	45.1	0.264216	TRIDC2BG010970.4	Elongation factor 1-alpha
	IWB47527	Kukri_c7193_5892	2B	119740806	2A	685875940		0.259127	TRIDC2BG018580.7	Nucleolar pre-ribosomal-associated protein 1
	IWB47512	Kukri_c7139_6288	2B	145622861	n.c.	n.c.	73.7	0.585949	TRIDC2BG021380.12	Transformation/transcription domain-associated protein
	IWB34469	IAAV1903	2B	186849423	2B	174375361	84	0.406461	TRIDC2BG026200.5	Alpha/beta hydrolase domain-containing protein 13
	IWB60612	RAC875_c8045_231	2B	205359143	2B	197538224	87.3	0.450838	TRIDC2BG028500.4	Nucleotide-diphospho-sugar transferase family protein
	IWB44160	Kukri_c32980_680	2B	208457093	2B	200633779	87.3	0.330003	TRIDC2BG028780.1	undescribed protein
	IWA4606	wsnp_Ex_c7003_12065828	2B	213285018	2B	205398993	87.7	0.438729	TRIDC2BG029240.2	Major facilitator superfamily protein	PH	Maccaferri et al. 2019
	IWA7520	wsnp_Ku_rep_c73313_72887199	2B	216214997	2B	208384507	89.7	0.375057	TRIDC2BG029650.4	Protein kinase superfamily protein
	IWB52411	Ra_c6700_406	2B	218203577	2B	210326793	89.7	0.543582	TRIDC2BG029920.12	time for coffee
	IWB5274	BobWhite_rep_c61602_139	2B	240701772	2B	232865798	90.8	0.273288	TRIDC2BG031750.1	V-type proton ATPase subunit H
	IWB46528	Kukri_c55599_153	2B	454801139	2B	448133538	100.7	0.56324	TRIDC2BG046700.3	Protein GrpE
	IWB72819	Tdurum_contig61682_187	2B	474980368	2B	468493123	100.7	0.40581	TRIDC2BG048650.1	Signal peptidase complex subunit 2
	IWB51163	Ra_c15365_530	2B	524464705	2B	515125122	108.2	0.315394	TRIDC2BG053680.3	glycine-rich protein .
	IWB67747	Tdurum_contig12836_418	2B	528712939	2B	519703127	108.9	0.510424	TRIDC2BG054200.5	Cytochrome b561 and DOMON domain-containing protein
	IWB73809	Tdurum_contig92604_368	2B	546900973	2B	537614390	112.3	0.506717	TRIDC2BG055970.1	BTB/POZ domain-containing protein
	IWB69271	Tdurum_contig26542_457	2B	553914829	2B	544739264	114.4	0.318497	TRIDC2BG056750.13	RNA polymerase II C-terminal domain phosphatase-like 1
	IWB68044	Tdurum_contig13653_471	2B	562933274	2B	554908560		0.255746	TRIDC2BG057690.11	Nucleotide/sugar transporter family protein
	IWB8009	BS00035335_51	2B	589986373	2B	582387482	119.6	0.335066	TRIDC2BG060130.1	Mechanosensitive ion channel protein
	IWB42187	Kukri_c19751_873	2B	592191562	2B	584626735	120.2	0.346119	TRIDC2BG060350.4	3-oxo-5-alpha-steroid 4-dehydrogenase family protein
	IWB38293	Ku_c12037_482	2B	608458978	2B	601018578	123.4	0.400359	TRIDC2BG061780.2	Lysine-specific histone demethylase 1 homolog 3	HD	Maccaferri et al. 2019
	IWB45296	Kukri_c4294_371	2B	644994322	2B	637407281	129.8	0.338816	TRIDC2BG066320.11	undescribed protein
	IWB24309	Excalibur_c25414_806	2B	653158256	2B	645654259	131.2	0.359495	TRIDC2BG067290.14	P-loop containing nucleoside triphosphate hydrolases superfamily protein
	IWB45932	Kukri_c49007_501	2B	655417150	2B	647949326	131.2	0.286706	TRIDC2BG067640.9	unknown function
	IWA4890	wsnp_Ex_c922_1775246	2B	658374989	2B	650820190	131.6	0.318023	TRIDC2BG067910.7	RNA-binding (RRM/RBD/RNP motifs) family protein
	IWB45933	Kukri_c49010_266	2B	660935938	2B	653319654	132.3	0.494823	TRIDC2BG068170.2	Plant protein of unknown function (DUF827)
	IWB11159	BS00080967_51	2B	666017890	2B	658663239	133.3	0.320332	TRIDC2BG068750.6	ABC transporter C family member 9
	IWB8421	BS00046166_51	2B	669754451	2B	662682144	134.8	0.254132	TRIDC2BG069360.4	unknown function
	IWB31274	Excalibur_rep_c77221_93	2B	677865933	2B	669443067	136.6	0.347409	TRIDC2BG070560.6	DTW domain-containing protein
	IWB73472	Tdurum_contig80351_311	2B	681827097	2B	673039333		0.287967	TRIDC2BG071010.6	Disease resistance protein
	IWB64008	RFL_Contig2612_826	2B	688485636	2B	617006649	#N/A	0.35311	TRIDC2BG072050.7	Polyadenylate-binding protein 4	Polyphenol oxidase, chloroplastic	Anvi et al. 2017
	IWB28504	Excalibur_c685_165	2B	695092195	2A	714624739		0.590742	TRIDC2BG073150.5	unknown function
	IWB74201	tplb0024l03_910	2B	708650323	2B	701101842	146.5	0.344063	TRIDC2BG074910.2	Protein transport protein SEC13 homolog B	GS2 Glutamine synthetase	Nigro et al. 2019
	IWB10182	BS00067907_51	2B	718202231	2B	710148576		0.444943	TRIDC2BG076060.2	BTB/POZ domain-containing protein 9	GS2 Glutamine synthetase	Nigro et al. 2019
	IWB62592	RAC875_rep_c69619_145	2B	726867100	2B	717967745		0.312875	TRIDC2BG077140.6	jasmonate-zim-domain protein 12	GS2 Glutamine synthetase	Nigro et al. 2019
	IWA8406	wsnp_RFL_Contig2914_2757372	2B	737067899	2B	727248831	153.4	0.355401	TRIDC2BG078330.4	Crossover junction endonuclease EME1
	IWB28183	Excalibur_c63243_434	2B	740918628	2B	729804410		0.33666	TRIDC2BG078910.14	undescribed protein
	IWA5081	wsnp_Ex_rep_c103064_88104690	2B	749396527	2B	737672958	161.5	0.293769	TRIDC2BG080420.12	DNA polymerase I
	IWB29591	Excalibur_c9752_619	2B	759299893	2B	746803809	165.7	0.25304	TRIDC2BG082490.3	Phosphatidylinositol 4-kinase gamma 6
	IWB28561	Excalibur_c7051_1027	2B	765314404	2B	754840818	169.3	0.31675	TRIDC2BG083690.1	Zinc finger CCCH domain-containing protein 32
	IWB40456	Kukri_c10869_1591	2B	774949870	2B	763124316	172.4	0.660945	TRIDC2BG085320.8	paralog of ARC6
	IWB55326	RAC875_c22328_1356	2B	775207923	2B	763377997		0.264729	TRIDC2BG085370.2	Dihydroorotate dehydrogenase (quinone)
	IWB24454	Excalibur_c26527_82	2B	776367864	2B	765318692	174.7	0.259234	TRIDC2BG085700.1	Lipase/lipooxygenase, PLAT/LH2 family protein
	IWB32211	GENE-1056_55	2B	779009499	n.c.	n.c.	175.6	0.250457	TRIDC2BG086400.5	Endonuclease MutS2
	IWB21105	Ex_c67202_741	2B	783475550	2B	770790069	#N/A	0.352361	TRIDC2BG087070.3	beta glucosidase 13
	IWA5093	wsnp_Ex_rep_c103381_88353000	2B	783921414	2B	771868560	180.1	0.455493	TRIDC2BG087090.1	4-hydroxy-7-methoxy-3-oxo-3,4-dihydro-2H-1, 4-benzoxazin-2-yl glucoside beta-D-glucosidase 1d, chloroplastic
	IWB36409	Jagger_c10188_98	2B	787016842	2B	773395895	181.6	0.287818	TRIDC2BG087600.8	Protein kinase family protein
	IWB12118	BS00100118_51	2B	788527190	2B	776814587	181.6	0.490839	TRIDC2BG087950.6	Cleavage and polyadenylation specificity factor subunit 5
	IWB10624	BS00072840_51	2B	789671877	n.c.	n.c.	181.6	0.498684	TRIDC2BG088110.2	Glutathione S-transferase family protein	grain C / survival C	Guo et al. 2017
	IWB74736	tplb0042a21_1091	2B	791585128	2B	779015671	185.7	0.474769	TRIDC2BG088530.3	Prenylcysteine oxidase
	IWB7606	BS00026037_51	2B	793213735	2B	780906154	185.8	0.306706	TRIDC2BG088750.6	FAR1-related sequence 5
	IWB74748	tplb0042o21_419	2B	793866898	2B	781593041	185.8	0.37115	TRIDC2BG089080.7	RNA-binding (RRM/RBD/RNP motifs) family protein
	IWB32029	GENE-0676_322	2B	796551637	2B	784100454		0.465168	TRIDC2BG089850.5	DDB1- and CUL4-associated factor homolog 1
	IWB75017	tplb0053a24_2194	3A	6812386	3A	4431705	#N/A	0.27545	TRIDC3AG002080.8	RNA polymerase II-associated factor 1 homolog
	IWB60283	RAC875_c7060_67	3A	6909652	3A	4325500	5.3	0.357166	TRIDC3AG002100.5	U-box domain-containing protein 4
	IWA851	wsnp_CAP11_rep_c4157_1965583	3A	19085713	3A	16511896	16.5	0.626702	TRIDC3AG003990.15	sugar transporter 9
	IWB41102	Kukri_c13830_556	3A	19396617	3A	16808095	#N/A	0.458385	TRIDC3AG004080.4	Delta(7)-sterol-C5(6)-desaturase
	IWA7086	wsnp_Ku_c4568_8243775	3A	33197722	3A	30855213	33.6	0.328382	TRIDC3AG006750.15	myosin 1
	IWB45716	Kukri_c46948_558	3A	41227044	3A	40650884		0.320954	TRIDC3AG008510.2	E3 ubiquitin-protein ligase UBR2
	IWB52965	RAC875_c10246_839	3A	44359240	3A	43943524		0.523768	TRIDC3AG009120.6	Plant/mmn10-180 protein
	IWA6652	wsnp_Ku_c18497_27803432	3A	624233333	3A	600167153	105.3	0.397836	TRIDC3AG054200.7	unknown function
	IWB72528	Tdurum_contig56731_335	3A	638377992	3A	633329612	109.1	0.272644	TRIDC3AG056190.6	U-box domain-containing protein 45
	IWA5456	wsnp_Ex_rep_c67786_66472676	3A	648900201	3A	644234045	114.6	0.554298	TRIDC3AG058090.1	DNA repair metallo-beta-lactamase family protein
	IWB36105	IACX6065	3A	691835148	3A	685995549	#N/A	0.300125	TRIDC3AG064870.5	Regulator of Vps4 activity in the MVB pathway protein
	IWA2518	wsnp_Ex_c20250_29303152	3A	692562654	3A	687446416	136.5	0.428332	TRIDC3AG064940.12	Bifunctional purine biosynthesis protein PurH
	IWB7045	BS00022368_51	3A	694180277	3A	689044090	140.5	0.458488	TRIDC3AG065420.1	undescribed protein
	IWB66139	Tdurum_contig100004_204	3A	697560618	3A	691461158		0.293734	TRIDC3AG065870.20	Agenet domain-containing protein
	IWB11992	BS00097265_51	3A	698355596	3A	691995053	141.5	0.317564	TRIDC3AG066070.7	Vesicle-associated membrane protein-associated protein A
	IWB9995	BS00067228_51	3A	698744471	3A	692865953	141.6	0.372793	TRIDC3AG066150.1	unknown function
	IWB12651	CAP11_c1022_117	3A	711466933	3A	705433237	148.5	0.539193	TRIDC3AG068260.1	annexin 5
	IWB7482	BS00023222_51	3A	711890783	3A	705871766	150.1	0.295744	TRIDC3AG068460.1	undescribed protein
	IWB72476	Tdurum_contig55841_351	3A	720701639	3A	713344599	159.1	0.271242	TRIDC3AG069940.7	Beta-galactosidase
	IWB833	BobWhite_c15763_205	3A	726594370	3A	720323316		0.406483	TRIDC3AG070970.3	Signal recognition particle receptor FtsY
	IWB29214	Excalibur_c878_1249	3B	5531190	3B	4455202		0.541846	TRIDC3BG001530.2	Disease resistance protein
	IWA4796	wsnp_Ex_c8360_14085858	3B	6286848	3B	5563885	5.2	0.299126	TRIDC3BG001730.5	TPX2 (targeting protein for Xklp2) protein family
	IWB60771	RAC875_c8459_1291	3B	9512153	3B	13555396	12.5	0.250568	TRIDC3BG002830.1	undescribed protein
	IWB12639	BS00111294_51	3B	12304535	3B	10877344	#N/A	0.31675	TRIDC3BG003550.1	undescribed protein
	IWB6299	BS00010849_51	3B	16989244	3B	15027471	13.1	0.29006	TRIDC3BG004400.2	Protein kinase superfamily protein
	IWB74707	tplb0041e10_1230	3B	20232152	3B	17838536	16.7	0.328596	TRIDC3BG004980.2	WD repeat-containing protein 1
	IWB48628	Kukri_rep_c101341_425	3B	20241610	3B	17847715	16.7	0.265462	TRIDC3BG004990.6	ubiquitin-conjugating enzyme 23
	IWB11760	BS00092492_51	3B	55508629	3B	54987693	42.5	0.26503	TRIDC3BG010620.6	Scarecrow-like transcription factor 11, putative isoform 1
	IWB14564	CAP8_c1799_237	3B	62847403	3B	61998805	45.3	0.30026	TRIDC3BG011880.4	triosephosphate isomerase
	IWA6192	wsnp_JD_c828_1226159	3B	68824238	n.c.	n.c.	48.6	0.519695	TRIDC3BG012830.4	Fatty acid oxidation complex subunit alpha
	IWB32713	GENE-1900_115	3B	69424531	3B	67253287	48.8	0.529063	TRIDC3BG012990.1	Short-chain dehydrogenase TIC 32, chloroplastic
	IWB35832	IACX2048	3B	71847730	3B	69791685	48.9	0.395983	TRIDC3BG013280.12	Ubiquitin-like superfamily protein
	IWB45903	Kukri_c48750_1416	3B	74336483	3B	73526414	50.3	0.467741	TRIDC3BG013750.21	RNA recognition motif (RRM)-containing protein	HD/ARL/YP/FHB	Maccaferri et al. 2019
	IWB23630	Excalibur_c21372_142	3B	75144108	3B	74287173	51.9	0.326628	TRIDC3BG013970.7	Protein of unknown function (DUF1664)	HD/ARL/YP/FHB	Maccaferri et al. 2019
	IWB45870	Kukri_c48410_604	3B	141499012	3B	140908917		0.377617	TRIDC3BG020470.14	unknown function
	IWA4226	wsnp_Ex_c54357_57265797	3B	145520797	3B	145490141	64.8	0.42857	TRIDC3BG020870.19	Prolyl 4-hydroxylase subunit alpha-1
	IWB8392	BS00045195_51	3B	168336419	3B	167491923	70.1	0.33572	TRIDC3BG023270.3	GDSL esterase/lipase
	IWB75323	tplb0062h15_59	3B	180804445	3B	179793257	#N/A	0.341289	TRIDC3BG024510.1	undescribed protein
	IWA8465	wsnp_RFL_Contig3396_3515504	3B	553643032	3B	538963173		0.276931	TRIDC3BG050380.10	F-box only protein 21
	IWB35937	IACX3871	3B	573514851	3B	545443598	97.2	0.552365	TRIDC3BG052700.7	Adenine nucleotide alpha hydrolases-like superfamily protein
	IWB38055	Ku_c101932_436	3B	575186726	3B	699256784	97.2	0.267514	TRIDC3BG052870.10	unknown function
	IWB74910	tplb0048g05_866	3B	620410967	5A	507196211		0.329526	TRIDC3BG057580.1	undescribed protein
	IWB63601	RFL_Contig1291_309	3B	636355882	3B	631886414	#N/A	0.373995	TRIDC3BG058950.2	Protein of unknown function (DUF 3339)
	IWB7911	BS00032926_51	3B	666414226	3B	658833449	#N/A	0.380278	TRIDC3BG061880.10	Splicing factor 3B subunit 4
	IWB65390	TA001383-0516	3B	670346431	3B	662826329		0.25524	TRIDC3BG062350.10	tetratricopeptide repeat (TPR)-containing protein
	IWB10137	BS00067748_51	3B	673731297	3B	666484475		0.272644	TRIDC3BG062740.8	ABC transporter C family member 5
	IWB51803	Ra_c3129_2015	3B	682912285	3B	675941701	123.7	0.382365	TRIDC3BG063970.7	BTB/POZ and TAZ domain-containing protein 4
	IWB8515	BS00048754_51	3B	692813622	3B	686446014	#N/A	0.280656	TRIDC3BG065290.1	undescribed protein
	IWB8984	BS00063034_51	3B	695517203	3B	689232261	129.6	0.332196	TRIDC3BG065590.1	undescribed protein
	IWA81	wsnp_BE424246B_Ta_2_2	3B	699545479	3B	693208698	129.6	0.255746	TRIDC3BG065980.12	E3 ubiquitin-protein ligase RGLG2
	IWA5985	wsnp_JD_c29407_23413291	3B	703090339	3B	703951533	#N/A	0.255746	TRIDC3BG066530.21	Lipid A export ATP-binding/permease protein MsbA
	IWB5637	BobWhite_rep_c66990_294	3B	719820426	3B	717253683	131.4	0.342352	TRIDC3BG068120.3	E3 ubiquitin-protein ligase RNF4
	IWB27956	Excalibur_c60319_127	3B	732131833	3B	730079306	133	0.275531	TRIDC3BG069310.1	unknown function
	IWA6513	wsnp_Ku_c14082_22272647	3B	743902566	3B	741087642	138	0.46511	TRIDC3BG071040.11	beta glucosidase 11
	IWB38408	Ku_c13676_1074	3B	743951666	3B	741144264	#N/A	0.445369	TRIDC3BG071050.6	Disease resistance protein
	IWB54593	RAC875_c18058_1070	3B	749734543	3B	747206715	#N/A	0.299669	TRIDC3BG072020.1	unknown function
	IWB12091	BS00099738_51	3B	772933988	3B	770611618	155.5	0.429599	TRIDC3BG075510.2	undescribed protein
	IWB24136	Excalibur_c24354_465	3B	773884432	3B	772168682		0.27545	TRIDC3BG075590.8	nascent polypeptide-associated complex subunit alpha-like protein 3
	IWB9095	BS00063624_51	3B	773978583	3B	772265762	157.8	0.477102	TRIDC3BG075600.4	nascent polypeptide-associated complex subunit alpha-like protein 3
	IWB43985	Kukri_c31523_367	3B	784353932	3B	782362995		0.412628	TRIDC3BG077330.9	acetyl-CoA carboxylase 1
	IWB69415	Tdurum_contig28053_218	3B	808817831	3B	803896480	187.6	0.3956	TRIDC3BG081270.1	undescribed protein
	IWA5892	wsnp_JD_c18509_16968425	3B	841080588	3B	836157347	209.6	0.343486	TRIDC3BG087750.2	unknown function
	IWB72664	Tdurum_contig59603_74	4A	10094982	4A	9696052	11.7	0.412218	TRIDC4AG002130.6	Nuclear pore complex protein Nup98-Nup96	AlaAT Alanine aminotransferase	Nigro et al. 2019
	IWB52625	Ra_c74035_586	4A	17295183	4A	16519685	16.9	0.363522	TRIDC4AG003290.3	Protein of unknown function, DUF593
	IWB71865	Tdurum_contig48049_807	4A	37993770	4A	37150367	36.2	0.344106	TRIDC4AG006400.7	cyclin-related
	IWA4321	wsnp_Ex_c5690_9994334	4A	38924878	4A	38036274	37.8	0.394644	TRIDC4AG006580.6	undescribed protein
	IWB74057	Tdurum_contig9906_89	4A	45363622	4A	44605698	39	0.52092	TRIDC4AG007320.1	undescribed protein
	IWB43360	Kukri_c26943_862	4A	550276216	4A	549908702		0.282868	TRIDC4AG038790.3	Pentatricopeptide repeat-containing protein
	IWB71280	Tdurum_contig42528_884	4A	573837893	4A	573119523		0.450454	TRIDC4AG041810.4	Coatomer, alpha subunit	Rht-A1	Maccaferri et al. 2019
	IWB25253	Excalibur_c32735_603	4A	578009266	4A	577396352	72.1	0.420216	TRIDC4AG042870.2	Adenylosuccinate synthetase	lipoxygenase 3	Anvi et al. 2017
	IWB36833	Jagger_rep_c10288_53	4A	582993270	4A	582733456		0.589409	TRIDC4AG043790.4	Plasma membrane ATPase 1
	IWA4199	wsnp_Ex_c539_1072859	4A	590033932	4A	589331539	80.8	0.420783	TRIDC4AG045850.7	5-methyltetrahydropteroyltriglutamate--homocysteine methyltransferase 2
	IWB58408	RAC875_c48107_65	4A	590301270	4A	589570189	81.4	0.305316	TRIDC4AG045970.11	cationic amino acid transporter 2
	IWB56959	RAC875_c34515_343	4A	615630224	4A	617606418	#N/A	0.31794	TRIDC4AG051800.1	Aspartic proteinase nepenthesin-2
	IWB9263	BS00064369_51	4A	677435687	4A	687435163	140.7	0.313506	TRIDC4AG062490.3	Leucine-rich repeat receptor-like protein kinase family protein
	IWB22779	Excalibur_c16355_712	4A	697710223	7A	18265287	#N/A	0.290132	TRIDC4AG065750.2	Disease resistance protein RPM1
	IWB53393	RAC875_c11702_1015	4A	724634226	4A	731077943	171.2	0.480636	TRIDC4AG072020.6	Monocopper oxidase-like protein SKU5
	IWB22429	Excalibur_c14401_743	4B	2007477	4B	1400834	0.3	0.433352	TRIDC4BG000600.3	beta-amylase 2
	IWB65491	TA002019-0994	4B	4508722	n.c.	n.c.	0.3	0.324787	TRIDC4BG001530.1	undescribed protein
	IWB66459	Tdurum_contig10322_1908	4B	11025339	4B	11075307	10	0.3634	TRIDC4BG002820.9	Membralin
	IWB8084	BS00037094_51	4B	11969111	4B	12047851	12.8	0.576221	TRIDC4BG003050.25	undescribed protein
	IWB74821	tplb0045c06_1675	4B	12128923	4B	12214283	12.8	0.332406	TRIDC4BG003110.4	Vicilin
	IWB71830	Tdurum_contig47622_234	4B	12544683	4B	12561995	13.3	0.272119	TRIDC4BG003260.7	ARM repeat superfamily protein
	IWB63894	RFL_Contig2277_1527	4B	12556029	4B	12573269	12.8	0.359624	TRIDC4BG003290.2	Pleckstrin homology (PH) domain-containing protein
	IWB70174	Tdurum_contig31139_79	4B	13084979	n.c.	n.c.	14.4	0.541991	TRIDC4BG003320.4	Transmembrane protein 56
	IWB56032	RAC875_c27160_307	4B	13186245	4B	13407550	15.5	0.457293	TRIDC4BG003450.5	aminopeptidase M1
	IWB48055	Kukri_c8594_203	4B	16134349	4B	16668969	17.7	0.326626	TRIDC4BG004150.1	ankyrin repeat family protein
	IWA3290	wsnp_Ex_c30695_39579408	4B	19641887	4B	19845244	19.3	0.280328	TRIDC4BG004610.1	ubiquitin-protein ligase 7
	IWB46249	Kukri_c52413_282	4B	20784874	4B	21010291	21	0.293777	TRIDC4BG004890.6	undescribed protein
	IWB7078	BS00022431_51	4B	23524456	4B	23204984	22.5	0.298746	TRIDC4BG005540.18	undescribed protein	PH/ARL/KNS	Maccaferri et al. 2019
	IWB71276	Tdurum_contig42528_1416	4B	31767848	4B	31745734	34	0.453175	TRIDC4BG007220.3	Coatomer, alpha subunit
	IWB73564	Tdurum_contig82378_561	4B	33763225	4B	33909147	34.4	0.546237	TRIDC4BG007500.2	NADH-ubiquinone oxidoreductase 75 kDa subunit	pasta_b*/pigLoss/Rht-B1	N’Diaye - ‎2017
	IWB73563	Tdurum_contig82378_264	4B	33763522	4B	33909444	34.4	0.515015	TRIDC4BG007500.2	NADH-ubiquinone oxidoreductase 75 kDa subunit	pasta_b*/pigLoss/Rht-B1	N’Diaye - ‎2017
	IWB70449	Tdurum_contig33737_157	4B	35774710	4B	35982154	35	0.600543	TRIDC4BG007730.7	GPN-loop GTPase 3	KNS/TG	Maccaferri et al. 2019
	IWB35611	IAAV971	4B	38801541	4B	39157292	36.1	0.394397	TRIDC4BG008140.5	Protein kinase superfamily protein	Lox1
	IWB6994	BS00022258_51	4B	43204978	4B	44119935	38	0.296412	TRIDC4BG008730.9	FIP1
	IWB65619	TA002925-3757	4B	60914779	4B	61572674	40.5	0.276597	TRIDC4BG010640.5	serine hydroxymethyltransferase 2	GPC/GY-PH- HD-TKW/SHI/pasta_b*/pigLoss	Maccaferri et al. 2019: N’Diaye - ‎2017
	IWB9576	BS00065533_51	4B	383171827	1B	456360566		0.364683	TRIDC4BG031240.18	ABC transporter B family member 25, mitochondrial
	IWB9406	BS00064935_51	4B	411335265	4B	422905679	#N/A	0.258554	TRIDC4BG033850.6	fatty acid desaturase 8
	IWB34975	IAAV5117	4B	503399973	4B	501258376	62	0.27736	TRIDC4BG042140.3	Heat stress transcription factor A-9
	IWB64397	RFL_Contig3563_1130	4B	522659488	4B	521547269	64.4	0.365359	TRIDC4BG043780.2	Transcriptional factor B3 family protein
	IWB51658	Ra_c27465_564	4B	524368062	4B	523168883	#N/A	0.448658	TRIDC4BG044050.8	Alpha-L-fucosidase 2
	IWB25207	Excalibur_c32467_676	4B	539969051	4B	538382521	68.9	0.316281	TRIDC4BG045740.5	sulfate transporter 1;2	GSr1 Glutamine synthetase	Nigro et al. 2019
	IWB9178	BS00064041_51	4B	609287129	4B	606999906	81.5	0.597706	TRIDC4BG053040.1	unknown function	PDS Phytoene desaturase	Colasuonno et al. 2017
	IWB1606	BobWhite_c22580_115	4B	610048706	4B	607755186	81.5	0.432745	TRIDC4BG053130.2	Methyltransferase-like protein 1
	IWA1100	wsnp_CAP7_c599_312057	4B	656746497	4B	656790159	#N/A	0.432612	TRIDC4BG060740.7	apyrase 2
	IWB11068	BS00079189_51	5A	14957738	5A	16326537	#N/A	0.381944	TRIDC5AG002810.8	Nucleolar complex protein 2 homolog
	IWA4765	wsnp_Ex_c807_1585614	5A	18590613	5A	19874811	26.2	0.466169	TRIDC5AG003470.3	Disease resistance protein
	IWB6696	BS00021660_51	5A	48236097	5A	49401194	43.8	0.368402	TRIDC5AG008020.5	Cysteine-rich receptor-like protein kinase 10	Asparagine synthetase	Nigro et al. 2019
	IWB53967	RAC875_c14659_1066	5A	219143831	5A	219898069	#N/A	0.253698	TRIDC5AG018020.1	undescribed protein
	IWB9533	BS00065386_51	5A	238594090	5A	436143495	84.2	0.288158	TRIDC5AG019010.2	undescribed protein
	IWB29652	Excalibur_c99101_82	5A	401187193	5A	394123058		0.267439	TRIDC5AG032210.1	undescribed protein
	IWB6853	BS00022003_51	5A	442683373	5A	405620301	67	0.259127	TRIDC5AG036430.2	Vacuolar-processing enzyme
	IWB10858	BS00076221_51	5A	448354142	5A	411414173	69.9	0.259127	TRIDC5AG037070.16	unknown function
	IWB34380	IAAV1417	5A	467685526	5A	432480295	84.2	0.414266	TRIDC5AG039530.3	D6 protein kinase like 2
	IWB12115	BS00100107_51	5A	476265635	5A	444851223	91.4	0.28439	TRIDC5AG041090.3	Ribosomal silencing factor RsfS
	IWB61293	RAC875_c99519_227	5A	484856061	5A	453207763	96.6	0.69918	TRIDC5AG042230.10	Transport inhibitor response 1-like protein
	IWA6573	wsnp_Ku_c15816_24541162	5A	497920018	5A	465822067	101.9	0.364313	TRIDC5AG043910.12	ADP-ribosylation factor GTPase-activating protein 3
	IWB52493	Ra_c700_2210	5A	498153826	5A	466080433	102.2	0.47257	TRIDC5AG043950.2	Disease resistance protein
	IWB59214	RAC875_c56635_1008	5A	499239568	5A	467151837	#N/A	0.255746	TRIDC5AG044210.13	CCR4-NOT transcription complex subunit 2
	IWB28392	Excalibur_c6567_845	5A	500095911	5A	467779851	#N/A	0.365536	TRIDC5AG044300.1	undescribed protein
	IWB56233	RAC875_c28819_281	5A	500429102	5A	468101260	104.9	0.718037	TRIDC5AG044390.4	Ankyrin repeat domain-containing protein 2A
	IWB56637	RAC875_c31670_389	5A	510060800	5A	477321350	106.6	0.271031	TRIDC5AG045530.5	Ankyrin repeat family protein
	IWB7414	BS00023076_51	5A	520563737	5A	487821009	#N/A	0.262731	TRIDC5AG046580.1	RHOMBOID-like protein 3
	IWA7135	wsnp_Ku_c51039_56457361	5A	523750149	5A	491036034	111.3	0.450528	TRIDC5AG046940.15	kinesin-like protein 1	Vrn-A1	Balint et al. 2009
	IWB41287	Kukri_c14889_1086	5A	535829928	5A	503012460	114.9	0.563035	TRIDC5AG048810.3	protein kinase family protein
	IWB10594	BS00072156_51	5A	536408676	5A	503595717	115.5	0.392076	TRIDC5AG049000.4	winged-helix DNA-binding transcription factor family protein	TKW -PC-TKW-GY-PH	Maccaferri et al. 2019
	IWB66909	Tdurum_contig11060_433	5A	539881645	5A	507220834		0.31794	TRIDC5AG049250.5	LRR receptor-like serine/threonine-protein kinase FLS2	PSY3 Phytoene synthase 3	Colasuonno et al. 2017
	IWB46400	Kukri_c54078_114	5A	560338075	5B	542502820		0.39846	TRIDC5AG053340.5	Molybdenum cofactor sulfurase family protein	PSY3 Phytoene synthase 3	Colasuonno et al. 2017
	IWB47196	Kukri_c6492_375	5A	563243390	5A	529834823	134.5	0.275531	TRIDC5AG053790.3	UDP-3-O-acylglucosamine N-acyltransferase	FR-A1	Galiba et al. 1995
	IWB34355	IAAV1311	5A	565011396	5A	531701513	135.2	0.271872	TRIDC5AG054150.7	Plasma-membrane choline transporter family protein
	IWB56489	RAC875_c30566_230	5A	580158773	5A	546754316	142.8	0.528037	TRIDC5AG056680.10	Beta-glucosidase C
	IWB23955	Excalibur_c23354_306	5A	583630864	5A	548462218	144.8	0.270791	TRIDC5AG057050.1	Chaperone DnaJ-domain superfamily protein	Vrn-A1	Maccaferri et al. 2019
	IWA454	wsnp_BF293620A_Ta_2_1	5A	583808886	n.c.	n.c.	144.8	0.287715	TRIDC5AG057120.6	Cleavage stimulation factor subunit 50
	IWB72051	Tdurum_contig50175_875	5A	589514417	5A	555977858	147.1	0.365382	TRIDC5AG058370.8	Two-component response regulator ARR2
	IWB8258	BS00041063_51	5A	590110597	5A	556583673	146.5	0.44403	TRIDC5AG058430.7	unknown function
	IWB37063	JD_c15758_288	5A	590512536	5A	557031715	147.4	0.379683	TRIDC5AG058530.4	Transmembrane protein 147
	IWB38320	Ku_c12469_983	5A	591626386	5A	558171449	148.8	0.391455	TRIDC5AG058850.5	Cytochrome c biogenesis protein CcsB
	IWB27060	Excalibur_c49550_97	5A	592815919	5A	559337416	149.7	0.663039	TRIDC5AG059000.2	eukaryotic translation initiation factor 3 subunit C2
	IWB6903	BS00022098_51	5A	604551549	n.c.	n.c.	156.5	0.515577	TRIDC5AG061240.18	Splicing factor U2AF 23 kDa subunit
	IWA675	wsnp_CAP11_c1506_840951	5A	605216123	5A	571369803	156.5	0.349828	TRIDC5AG061350.10	L-lactate dehydrogenase
	IWB35863	IACX2540	5A	613854240	5A	580943882	160	0.296804	TRIDC5AG062770.2	Bax inhibitor-1 family protein
	IWB46500	Kukri_c55310_94	5A	625748708	5B	632327668		0.285669	TRIDC5AG064880.11	Histidine kinase-, DNA gyrase B-, and HSP90-like ATPase family protein
	IWB72378	Tdurum_contig54689_646	5A	677049849	5A	644116786	199.6	0.424178	TRIDC5AG074320.1	Riboflavin biosynthesis protein RibD
	IWA3335	wsnp_Ex_c3136_5798236	5A	677672340	5A	644740195	199.6	0.337384	TRIDC5AG074380.6	26S proteasome non-ATPase regulatory subunit 11 homolog
	IWB6716	BS00021688_51	5A	689581673	5A	657083954	208.8	0.60318	TRIDC5AG076650.3	unknown function	Vrn-A2; max floret C /max floret average / floret primordia loss C	Lowe et al. 2011; Guo et al. 2017
	IWB60646	RAC875_c8121_1997	5A	690441697	4A	997272		0.262972	TRIDC5AG076860.4	E3 ubiquitin-protein ligase SINA-like 11
	IWB6768	BS00021860_51	5A	695442990	5A	663827863	#N/A	0.27545	TRIDC5AG077830.3	Embryogenesis transmembrane protein-like
	IWB58325	RAC875_c47212_309	5B	12855662	5B	13208876	10.1	0.304178	TRIDC5BG002270.12	Haloacid dehalogenase-like hydrolase (HAD) superfamily protein
	IWB2816	BobWhite_c36054_53	5B	287121003	5B	278123024	42.7	0.344903	TRIDC5BG026590.1	unknown function
	IWB7194	BS00022652_51	5B	392107905	5B	377861236	#N/A	0.289801	TRIDC5BG035830.4	Cytochrome P450 superfamily protein
	IWB56335	RAC875_c29431_1849	5B	405924266	5B	394272251	50.2	0.308989	TRIDC5BG037470.1	Pentatricopeptide repeat-containing protein
	IWB8505	BS00048572_51	5B	407804464	5B	396111077	#N/A	0.31794	TRIDC5BG037640.2	unknown function
	IWB7678	BS00028183_51	5B	439666573	5B	428793751	#N/A	0.422944	TRIDC5BG041540.3	undescribed protein
	IWA4957	wsnp_Ex_c974_1864971	5B	478918787	5B	474885816	72.9	0.479578	TRIDC5BG046990.10	unknown function
	IWB9509	BS00065313_51	5B	496052620	5B	489771684	82	0.271031	TRIDC5BG049520.4	Disease resistance protein
	IWB68661	Tdurum_contig17500_876	5B	521101818	5B	513955558	92.2	0.50324	TRIDC5BG052830.4	SKP1-like 4
	IWB8298	BS00042014_51	5B	525925096	5B	518378088	94.5	0.268831	TRIDC5BG053420.1	undescribed protein
	IWB28925	Excalibur_c7968_2218	5B	540087068	5B	530573115	100.3	0.294624	TRIDC5BG055670.3	Serine/threonine-protein kinase
	IWB35312	IAAV7226	5B	548831794	5B	540048670	106.2	0.39459	TRIDC5BG057040.1	Cytochrome P450 superfamily protein
	IWA6895	wsnp_Ku_c3102_5811860	5B	551313730	5B	542499464	107.6	0.501675	TRIDC5BG057320.7	zinc finger (C2H2 type) family protein
	IWB50811	Ra_c10633_2155	5B	552846185	n.c.	n.c.	110.2	0.397438	TRIDC5BG057680.22	Solute carrier family 12 member 6
	IWB66355	Tdurum_contig10210_425	5B	556522599	5A	531759920		0.310085	TRIDC5BG058140.13	RHOMBOID-like protein 15
	IWB7745	BS00029869_51	5B	560193805	5B	551310600	114.5	0.279418	TRIDC5BG058630.15	DNA-directed RNA polymerase family protein
	IWA7735	wsnp_Ra_c2105_4092507	5B	560996162	5B	552220003	114.9	0.254587	TRIDC5BG058750.1	undescribed protein
	IWB50957	Ra_c11667_324	5B	572100271	5B	562801497	119.3	0.308139	TRIDC5BG059900.14	polyubiquitin 10
	IWB7206	BS00022673_51	5B	590095893	5B	580878439	129.7	0.258387	TRIDC5BG062890.2	N-terminal protein myristoylation
	IWB69503	Tdurum_contig28353_1628	5B	597899819	5B	588418349	135.6	0.255348	TRIDC5BG063980.6	citrate synthase 2
	IWB54309	RAC875_c16536_80	5B	600831448	5B	591793671	136.7	0.313612	TRIDC5BG064270.2	Inosine-5'-monophosphate dehydrogenase
	IWB8292	BS00041911_51	5B	607447453	5B	598174984	140	0.53395	TRIDC5BG065330.5	40S ribosomal protein S12	GDH Glutamate dehydrogenase	Nigro et al. 2019
	IWB35422	IAAV8042	5B	614555241	5B	605196600		0.257978	TRIDC5BG066550.12	Type IV inositol polyphosphate 5-phosphatase 7	GDH Glutamate dehydrogenase	Nigro et al. 2019
	IWB58404	RAC875_c48052_127	5B	638418331	5B	632328264	152.1	0.291138	TRIDC5BG069810.3	Histidine kinase-, DNA gyrase B-, and HSP90-like ATPase family protein	VRN-B1 5B 151 cM
	IWA6406	wsnp_Ku_c1075_2160065	5B	647505635	6A	561478432		0.445715	TRIDC5BG071310.2	Protein FAR1-RELATED SEQUENCE 3
	#N/A	BobWhite_c11038_605	5B	654147947	5B	646590215	158.3	0.330645	TRIDC5BG072310.7	40S ribosomal protein S26
	IWB1968	BobWhite_c26082_239	5B	687467478	5B	676033120	182.5	0.264925	TRIDC5BG078250.1	undescribed protein
	IWB28598	Excalibur_c71602_591	5B	710532782	5B	699873030	206.1	0.269037	TRIDC5BG083780.8	Protein kinase superfamily protein
	IWB57367	RAC875_c37988_243	5B	711812257	5B	700973071	206.2	0.431411	TRIDC5BG084140.7	F-box family protein
	IWB7581	BS00025560_51	6A	8521181	6A	7419102	4.3	0.325587	TRIDC6AG002320.5	RNA-binding protein 48
	IWB34573	IAAV2577	6A	9173147	6A	9432552	4.8	0.262372	TRIDC6AG002490.4	S-adenosyl-L-methionine-dependent methyltransferases superfamily protein
	IWB69896	Tdurum_contig29823_203	6A	10589921	6A	10247848	5.7	0.287362	TRIDC6AG002820.1	undescribed protein
	IWB61523	RAC875_rep_c105906_124	6A	10889359	n.c.	n.c.	20.4	0.255456	TRIDC6AG002910.6	U5 small nuclear ribonucleoprotein helicase, putative
	IWB7337	BS00022951_51	6A	16454526	6A	16753143	12.8	0.296165	TRIDC6AG004520.1	RNA-binding protein NOB1	NRT2 Nitrate transporter	Nigro et al. 2019
	IWB36255	IACX7895	6A	20129295	6A	19798420	#N/A	0.414266	TRIDC6AG005240.4	Disease resistance-responsive (dirigent-like protein) family protein
	IWB74998	tplb0052b07_577	6A	61188013	6A	60641171	40.9	0.267156	TRIDC6AG012190.6	Uncharacterised conserved protein (UCP030365)
	IWB63387	RAC875_rep_c99895_112	6A	66594004	6A	66195178		0.300418	TRIDC6AG012980.15	unknown function	Rht18	Mo et al. 2018
	IWB34455	IAAV1820	6A	83853753	6A	83361310		0.343379	TRIDC6AG015140.3	disease resistance family protein / LRR family protein
	IWA5466	wsnp_Ex_rep_c67878_66584488	6A	84621833	6A	84125582	#N/A	0.436164	TRIDC6AG015290.5	Splicing factor 3B subunit 1
	IWB74347	tplb0028p11_1104	6A	90612851	6A	90198499	46.5	0.401233	TRIDC6AG015880.6	Protein phosphatase 2C family protein
	IWB8364	BS00044311_51	6A	106199197	6A	105410204	50	0.303942	TRIDC6AG018180.6	serine/threonine protein kinase 1
	IWA5074	wsnp_Ex_rep_c102807_87894833	6A	548164371	6A	542710932	71.8	0.377812	TRIDC6AG046950.4	unknown function
	IWB13180	CAP12_c118_95	6A	555033124	6A	549680726	75.2	0.531959	TRIDC6AG048030.4	light-harvesting chlorophyll B-binding protein 3
	IWB24701	Excalibur_c2834_397	6A	555165997	6A	549816278	75.2	0.531987	TRIDC6AG048060.8	RNA polymerase-associated protein CTR9 homolog
	IWB13325	CAP12_c2701_221	6A	559333048	6A	554422547	82.1	0.252684	TRIDC6AG048910.3	nitrate reductase 1 (NR-6A)*		Nigro et al. 2019
	IWA4112	wsnp_Ex_c51820_55631560	6A	564840357	6A	560265864	86.2	0.276496	TRIDC6AG049990.3	Kinesin-related protein 11
	IWB35085	IAAV5761	6A	567860128	6A	562739041	86.3	0.382365	TRIDC6AG050080.7	Nuclear transcription factor Y subunit A-5
	IWA3585	wsnp_Ex_c36801_44683992	6A	568987066	6A	563920498	86.3	0.357688	TRIDC6AG050260.8	DENN domain-containing protein 5B
	IWA8386	wsnp_RFL_Contig2765_2513854	6A	604928388	n.c.	n.c.	120.5	0.252623	TRIDC6AG057640.8	Protein kinase superfamily protein
	IWB35245	IAAV6777	6A	605625633	6A	600476584	122.4	0.488134	TRIDC6AG057890.18	unknown function	CYP97A3 (LUT5) Carotenoid β-ring hydroxylase (Cytochrome P450-type monooxygenase CYP97A3) 122 cM	Colasuonno et al. 2017
	IWB12100	BS00099879_51	6A	608065330	6A	602617850	#N/A	0.281265	TRIDC6AG058260.3	C2 domain-containing protein
	IWB59179	RAC875_c56259_87	6A	614185121	6A	608255893	#N/A	0.288158	TRIDC6AG059930.7	titan9
	IWB59855	RAC875_c6429_132	6A	615541952	6A	609577993	127	0.253698	TRIDC6AG060300.4	receptor-like protein kinase 1
	IWB67689	Tdurum_contig12648_389	6A	617067659	6A	611066170		0.46349	TRIDC6AG060730.4	Calcium-dependent lipid-binding (CaLB domain) family protein
	IWB6503	BS00011962_51	6A	617887217	6A	612634272	#N/A	0.329248	TRIDC6AG061080.4	Mitochondrial intermediate peptidase
	IWB10991	BS00078124_51	6A	620337399	6A	614412446	#N/A	0.43728	TRIDC6AG061660.1	undescribed protein
	IWB60698	RAC875_c8254_249	6A	620593504	6A	614536653	131.2	0.392307	TRIDC6AG061730.24	callose synthase 1
	IWB34432	IAAV1711	6B	31588045	6B	28674710	31.3	0.283156	TRIDC6BG006400.4	RNA-binding protein NOB1
	IWB40519	Kukri_c11106_439	6B	39006935	6B	37361880		0.337523	TRIDC6BG007760.7	BHLH transcription factor
	IWB65082	RFL_Contig5693_646	6B	39190981	6B	37550043	#N/A	0.447078	TRIDC6BG007820.1	loricrin-related
	IWB60404	RAC875_c76124_264	6B	120383724	6B	113643509	54.6	0.306847	TRIDC6BG017430.7	Isoleucine--trna ligase
	IWB25753	Excalibur_c36771_136	6B	151402127	6B	142207246	64.8	0.356718	TRIDC6BG021440.13	DNA repair protein RAD5
	IWB53881	RAC875_c14171_664	6B	152338907	6B	142838234	64.8	0.378573	TRIDC6BG021520.4	unknown function
	IWB41171	Kukri_c14191_351	6B	153580402	6B	144050551	64.8	0.26479	TRIDC6BG021570.51	SNF1-related protein kinase regulatory subunit beta-3
	IWB26897	Excalibur_c47748_83	6B	160726391	6B	151143150	66.5	0.353605	TRIDC6BG022360.8	Fatty acid oxidation complex subunit alpha
	IWB51108	Ra_c14408_576	6B	169181102	6B	158252806	#N/A	0.303942	TRIDC6BG023610.12	5'-nucleotidase SurE
	IWB49923	Kukri_rep_c69660_52	6B	190336980	6B	179559043	69.9	0.303165	TRIDC6BG025850.6	sucrose phosphate synthase 1F
	IWB45968	Kukri_c49233_594	6B	192908930	6B	182067703	69.9	0.346255	TRIDC6BG025940.1	undescribed protein
	IWB7574	BS00025302_51	6B	204872079	6B	193948533	70.9	0.350349	TRIDC6BG026840.20	Ribulokinase 2
	IWB55300	RAC875_c22101_656	6B	207918264	6B	196991162	71.2	0.347913	TRIDC6BG027200.13	Receptor-like protein kinase 5
	IWB70802	Tdurum_contig42087_1941	6B	232817932	6B	229940270	71.6	0.378573	TRIDC6BG029540.3	undescribed protein
	IWA1545	wsnp_Ex_c11873_19047792	6B	234003828	6B	231128639	71.9	0.338647	TRIDC6BG029590.11	methyl-CPG-binding domain 9
	IWB9873	BS00066719_51	6B	240773764	6B	235412730		0.43854	TRIDC6BG030080.1	undescribed protein	TRIDC6BG030060.3 - Lycopene beta cyclase	Maccaferri et al. 2019
	IWB8576	BS00049942_51	6B	437800328	6B	432620790	74.9	0.331337	TRIDC6BG041330.1	undescribed protein
	IWA451	wsnp_BF293311B_Ta_2_3	6B	444645162	6B	439365045	74.9	0.350299	TRIDC6BG041920.9	cryptochrome 2
	IWB64417	RFL_Contig3609_1678	6B	450201072	6B	442953266	75.7	0.302543	TRIDC6BG042200.5	phenylalanine ammonia-lyase 2
	IWB72449	Tdurum_contig55473_221	6B	567063545	6B	559345293	92.3	0.27464	TRIDC6BG053250.6	Sec14p-like phosphatidylinositol transfer family protein
	IWB71780	Tdurum_contig47269_904	6B	577575174	6B	569781287	93	0.373461	TRIDC6BG054050.1	Photosynthetic NDH subcomplex B 4
	IWB47270	Kukri_c65887_282	6B	600379366	6B	589839563	#N/A	0.518235	TRIDC6BG055760.1	Lysine-specific histone demethylase 1 homolog 1
	IWB50266	Kukri_rep_c73457_419	6B	601571515	6A	549414950		0.545681	TRIDC6BG055930.7	DIS3-like exonuclease 2	NIR	Nigro et al. 2019
	IWB25244	Excalibur_c32711_504	6B	613807078	6B	602809053		0.31794	TRIDC6BG057380.5	Protein CPR-5	NIR	Nigro et al. 2019
	IWB73319	Tdurum_contig75814_655	6B	628204141	6A	566474508		0.32552	TRIDC6BG059220.3	MTD1	NIR	Nigro et al. 2019
	IWB74080	tplb0021a17_853	6B	660997483	6B	654758908	119.3	0.359857	TRIDC6BG064150.1	undescribed protein
	IWB10268	BS00068245_51	6B	678192064	6B	672318574	139.2	0.300125	TRIDC6BG067230.17	Protein of unknown function (DUF3741)
	IWB28016	Excalibur_c6108_394	6B	684602785	6A	614866905		0.459035	TRIDC6BG068080.16	MATE efflux family protein
	IWB60699	RAC875_c8254_594	6B	685454988	6B	695093664	155.1	0.422944	TRIDC6BG068360.47	callose synthase 1
	IWB46894	Kukri_c60966_261	6B	686953716	6B	693337572	155.1	0.361662	TRIDC6BG068790.3	unknown function
	IWB36435	Jagger_c1231_85	6B	692207856	n.c.	n.c.	147.5	0.452711	TRIDC6BG070320.2	undescribed protein
	IWB62149	RAC875_rep_c112449_669	6B	694348520	6B	685986969		0.341835	TRIDC6BG070670.4	NAC domain protein,
	IWB73836	Tdurum_contig92981_1091	6B	694349419	6B	685987968	148.2	0.341038	TRIDC6BG070670.8	NAC domain protein,
	IWA2431	wsnp_Ex_c19525_28494827	6B	696050600	6B	687891869	152.2	0.255838	TRIDC6BG071190.2	ABC transporter ATP-binding protein ARB1
	IWB55490	RAC875_c23338_792	6B	696667575	6B	691982200	#N/A	0.376025	TRIDC6BG071280.1	unknown function
	IWB54401	RAC875_c17011_373	6B	697328292	6B	692488594	#N/A	0.270788	TRIDC6BG071500.6	undescribed protein
	IWB66700	Tdurum_contig10729_989	6B	697985375	6B	690593419	155.1	0.55146	TRIDC6BG071680.25	RING/U-box superfamily protein
	IWB33728	GENE-4008_395	6B	701818428	6B	689151226		0.355039	TRIDC6BG073180.4	Putative integral membrane protein conserved region (DUF2404)
	IWB74964	tplb0050d17_1401	6B	703064038	6B	688254447	151	0.338816	TRIDC6BG073520.23	Sucrose transport protein
	IWB63095	RAC875_rep_c77127_256	7A	4246372	7A	5471485		0.2814	TRIDC7AG001190.4	receptor kinase 1
	IWB65750	TA003860-0675	7A	5708905	7A	6041757	#N/A	0.333403	TRIDC7AG001880.3	Ferredoxin--NADP reductase
	IWB11727	BS00091701_51	7A	5936485	7A	7504290	#N/A	0.350715	TRIDC7AG002010.1	Protein of unknown function (DUF1218)
	IWB24184	Excalibur_c24593_1217	7A	6189728	7A	7721495	2.8	0.424139	TRIDC7AG002080.2	Cytochrome P450 superfamily protein
	IWB55311	RAC875_c22210_191	7A	7053839	n.c.	n.c.	7	0.610171	TRIDC7AG002350.13	ATP-dependent RNA helicase eIF4A
	IWB34029	GENE-4592_541	7A	9396346	7A	10878563		0.377387	TRIDC7AG002890.10	S-adenosyl-L-methionine-dependent methyltransferases superfamily protein
	IWB71783	Tdurum_contig47309_600	7A	18151984	7A	20901291	14.1	0.343022	TRIDC7AG005070.18	Protein kinase superfamily protein
	IWB12840	CAP11_c3214_133	7A	18622768	7A	21205584	14.1	0.442525	TRIDC7AG005250.1	Multiple organellar RNA editing factor 8, chloroplastic/mitochondrial
	IWB59812	RAC875_c63822_185	7A	20575399	7A	23746251	17.8	0.296336	TRIDC7AG005690.9	Essential protein Yae1, N-terminal
	IWB8901	BS00062724_51	7A	30497582	7A	33749291	#N/A	0.258215	TRIDC7AG007780.4	Disease resistance protein RPM1
	IWB68559	Tdurum_contig16632_288	7A	34855341	7A	38274822	43.5	0.399409	TRIDC7AG008530.3	Pre-mRNA-splicing factor cwc26
	IWB34977	IAAV5150	7A	45465717	7A	50472474	53.3	0.366954	TRIDC7AG010000.9	ATP-dependent 6-phosphofructokinase 7
	IWB59061	RAC875_c54764_319	7A	48958465	7A	12854235	0.3	0.361428	TRIDC7AG010750.6	6-phosphogluconate dehydrogenase, decarboxylating 1
	IWB67816	Tdurum_contig13011_241	7A	53370791	7A	58452672	58.7	0.269088	TRIDC7AG011470.2	undescribed protein
	IWB44791	Kukri_c38390_218	7A	57436577	7A	61422784	59.8	0.292368	TRIDC7AG012190.3	unknown function
	IWB12020	BS00098026_51	7A	59270420	7A	63245393	61.7	0.366369	TRIDC7AG012540.1	3-ketoacyl-CoA synthase 6
	IWB72200	Tdurum_contig51645_738	7A	62289789	7A	66088136	62.5	0.298242	TRIDC7AG013010.4	unknown function
	IWB34089	GENE-4660_123	7A	63037506	7A	66753158	#N/A	0.397836	TRIDC7AG013100.5	Protein SIP5
	IWB60067	RAC875_c67063_703	7A	109617182	7A	108866724	89.6	0.480288	TRIDC7AG019400.4	Ethylene-responsive transcription factor 1
	IWB63084	RAC875_rep_c76772_850	7A	114087236	7A	113472467	90.2	0.31239	TRIDC7AG019880.9	auxin response factor 19	HD-PH	Maccaferri et al. 2019
	IWB35972	IACX481	7A	114510717	7A	113937919	90.9	0.402235	TRIDC7AG019920.8	10 kDa chaperonin
	IWB10156	BS00067808_51	7A	141464826	7A	140726129	107.6	0.26503	TRIDC7AG023350.1	undescribed protein
	IWB13686	CAP7_c10038_214	7A	567909865	7A	566938944	#N/A	0.255746	TRIDC7AG054600.3	RNA-directed DNA methylation protein
	IWB59304	RAC875_c57656_170	7A	615522425	7A	614197802	138.3	0.25625	TRIDC7AG059380.1	sulfotransferase 2A
	IWA1031	wsnp_CAP7_c1321_664478	7A	671454407	7A	669297485	167.2	0.505097	TRIDC7AG067670.3	Peptidyl-prolyl cis-trans isomerase	TKW-grain A / survival A	maccaferri et al. 2019; Guo et al. 2017
	IWA7406	wsnp_Ku_rep_c103889_90513052	7A	675159175	7A	673053287	168.4	0.313459	TRIDC7AG068350.7	TBC1 domain family member 5
	IWA7074	wsnp_Ku_c44760_51961180	7A	685328701	7A	682924061	172.9	0.295877	TRIDC7AG069740.10	Ubiquitin carboxyl-terminal hydrolase 19
	IWB9574	BS00065529_51	7A	685563034	7A	683508050	172.9	0.410842	TRIDC7AG069760.1	Histone H2B.6
	IWB3312	BobWhite_c43557_103	7A	722925739	7B	716678020		0.572613	TRIDC7AG077550.17	DNA-directed RNA polymerases I, II, and III subunit RPABC4
	IWB57016	RAC875_c34939_963	7A	722926230	7B	716677417		0.605226	TRIDC7AG077550.17	DNA-directed RNA polymerases I, II, and III subunit RPABC4
	IWB75238	tplb0060b03_432	7A	723573014	7B	717786300		0.597706	TRIDC7AG077660.7	Ycf48-like protein
	IWB45643	Kukri_c46310_84	7B	1666302	7B	1247189		0.269037	TRIDC7BG000340.17	COP1-interacting protein-related
	IWB1884	BobWhite_c25163_178	7B	6512086	7B	485640466		0.447746	TRIDC7BG001120.2	undescribed protein
	IWB13248	CAP12_c1816_325	7B	25936996	7B	22091813	19.4	0.386837	TRIDC7BG003590.3	Late embryogenesis abundant protein, group 2
	IWA2568	wsnp_Ex_c2103_3947695	7B	28880504	7B	24663257	20.7	0.38875	TRIDC7BG004030.15	E3 SUMO-protein ligase pli1
	IWB66266	Tdurum_contig10108_246	7B	31322323	7B	27261556	165.7	0.348366	TRIDC7BG004340.8	C2H2-like zinc finger protein
	IWB2860	BobWhite_c36693_210	7B	37024226	7B	33661749	25.4	0.408639	TRIDC7BG005080.2	calmodulin like 23
	IWB71921	Tdurum_contig48824_476	7B	51339887	7B	48060131	31.7	0.294363	TRIDC7BG007080.16	undescribed protein
	IWA4549	wsnp_Ex_c6590_11419735	7B	54659696	7B	51363436	31.9	0.255328	TRIDC7BG007370.2	Chromodomain-helicase-DNA-binding protein 3
	IWB41262	Kukri_c14766_484	7B	66319385	7B	617849760	128.9	0.433458	TRIDC7BG008680.1	unknown function
	IWB33912	GENE-4338_512	7B	79035605	7B	75078449		0.404661	TRIDC7BG010400.8	Receptor-like protein kinase 5
	IWB3531	BobWhite_c46772_564	7B	117123267	7B	112887886	57.6	0.283859	TRIDC7BG014610.2	tRNA (guanine-N-7) methyltransferase
	IWB54284	RAC875_c1638_165	7B	119630513	7B	115171213	#N/A	0.386873	TRIDC7BG015000.4	RNA-binding protein 47
	IWB34748	IAAV3646	7B	149895084	7B	143485686	63.6	0.339506	TRIDC7BG018110.7	D6 protein kinase like 2
	IWB43965	Kukri_c31305_75	7B	433246568	7B	410570933	76.1	0.281265	TRIDC7BG037580.4	RING/U-box superfamily protein
	IWB68987	Tdurum_contig23024_763	7B	586834218	7B	565085195		0.325112	TRIDC7BG052270.6	receptor kinase 2
	IWB58429	RAC875_c4834_694	7B	622004626	7B	597478587	120.4	0.38351	TRIDC7BG056710.2	carbonic anhydrase 1
	IWB55190	RAC875_c21489_908	7B	643349812	7B	618427783	128.9	0.433458	TRIDC7BG058990.10	undescribed protein
	IWB35974	IACX486	7B	643765799	7B	618037975	129.4	0.365376	TRIDC7BG059050.5	Glutathione S-transferase
	IWB68100	Tdurum_contig13930_254	7B	651145414	7B	628088216	132.8	0.38296	TRIDC7BG060220.1	Leucine-rich receptor-like protein kinase family protein
	IWB9120	BS00063744_51	7B	652814012	7B	629839837	#N/A	0.350715	TRIDC7BG060410.1	General transcription factor 2-related zinc finger protein
	IWA6589	wsnp_Ku_c16295_25149034	7B	653392232	7B	630418528	133	0.321498	TRIDC7BG060440.12	undescribed protein
	IWB58468	RAC875_c48766_224	7B	654347361	7B	631258858	132	0.288551	TRIDC7BG060570.7	unknown function
	IWB7642	BS00027054_51	7B	662038493	7B	639042373		0.420271	TRIDC7BG061540.6	BAG family molecular chaperone regulator 6
	IWB68678	Tdurum_contig17697_771	7B	705856657	7B	680417674	164.4	0.361312	TRIDC7BG068270.4	ENTH/ANTH/VHS superfamily protein
	IWA4803	wsnp_Ex_c8400_14157318	7B	708526547	7B	682651324	168.6	0.459041	TRIDC7BG068920.4	NF-X1-type zinc finger protein NFXL1
	IWB38836	Ku_c22990_969	7B	715910244	7B	688932905	175.9	0.267497	TRIDC7BG069960.3	Zinc finger CCCH domain-containing protein 7
	IWB3618	BobWhite_c478_1386	7B	722982283	6B	667812683		0.327502	TRIDC7BG071670.39	undescribed protein
	IWB71506	Tdurum_contig44206_1503	7B	734184801	7B	706922944	190.9	0.458979	TRIDC7BG073100.20	1,4-alpha-glucan branching enzyme GlgB
	IWB34230	GENE-4900_136	7B	743312582	n.c.	n.c.	196.5	0.303267	TRIDC7BG074030.27	callose synthase 1
	IWB64414	RFL_Contig3607_648	7B	749218177	n.c.	n.c.	202.9	0.572613	TRIDC7BG075860.8	Ycf48-like protein	PSY1-b1 Phytoene synthase 1 714361446bp Svevo
OC vs MC
	IWB7470	BS00023201_51	1A	6918899	1A	7558330	6.7	0.256466	TRIDC1AG001400.2	Defensin-like protein
	IWB71461	Tdurum_contig43943_1165	1A	9126954	1A	10134341	10.8	0.301465	TRIDC1AG002060.3	actin 7
	IWB68307	Tdurum_contig14847_144	1A	9129890	1A	10137276		0.409335	TRIDC1AG002070.5	Chaperone protein DnaJ
	IWA4754	wsnp_Ex_c7965_13520238	1A	11057188	Un	1287216	15.8	0.478181	TRIDC1AG002650.13	Protein kinase superfamily protein
	IWB8188	BS00039749_51	1A	18563960	#N/A	#N/A	20.7	0.306612	TRIDC1AG004290.3	Pathogenesis-related thaumatin superfamily protein
	IWB40979	Kukri_c13136_1363	1A	30658116	1A	25517671	28.4	0.473493	TRIDC1AG006200.7	E3 UFM1-protein ligase 1 homolog
	IWB47064	Kukri_c63336_621	1A	33143692	1A	27946970		0.414385	TRIDC1AG006610.3	undescribed protein
	IWB72042	Tdurum_contig5008_635	1A	49460159	1A	45805060	37.8	0.335685	TRIDC1AG008940.2	Retrotransposon protein, putative, Ty1-copia subclass
	IWB36084	IACX5982	1A	50765158	1A	47136197	40.7	0.519184	TRIDC1AG009260.4	Single-stranded nucleic acid binding R3H domain-containing protein
	IWB28131	Excalibur_c6255_1119	1A	156958361	1A	152822081	46.2	0.59522	TRIDC1AG018440.6	Receptor-like protein kinase
	IWB68771	Tdurum_contig19102_84	1A	280796407	1A	273664169		0.290048	TRIDC1AG023960.17	Amino-terminal region of chorein, A TM vesicle-mediated sorter
	IWB9675	BS00065930_51	1A	290488823	5B	61172677		0.530386	TRIDC1AG024510.1	undescribed protein
	IWB9149	BS00063885_51	1A	300184923	1A	292306137		0.580383	TRIDC1AG025350.3	Protein TIC110, chloroplastic
	IWB65334	TA001042-0912	1A	302768013	1A	294875270	47.8	0.341163	TRIDC1AG025700.3	Calcium uniporter protein 2, mitochondrial
	IWB10619	BS00072686_51	1A	314979351	1A	306989428	48.1	0.296155	TRIDC1AG026770.1	Non-specific lipid-transfer protein 2G
	IWB11667	BS00090634_51	1A	321930002	1A	313880940	#N/A	0.30767	TRIDC1AG027080.2	Protein BPS1, chloroplastic
	IWB35270	IAAV6919	1A	326169932	1A	318108456		0.270624	TRIDC1AG027430.6	unknown function
	IWB59770	RAC875_c6338_2719	1A	351782973	1A	343660961	49.7	0.271128	TRIDC1AG029290.6	DnaJ homolog subfamily C member 13
	IWB12984	CAP11_c6014_160	1A	367180631	1A	358935523	50.4	0.53968	TRIDC1AG030790.6	Chitinase family protein
	IWB6791	BS00021907_51	1A	420446313	1A	411822441		0.291623	TRIDC1AG035600.6	unknown function
	IWA8070	wsnp_Ra_c7818_13376644	1A	479643317	1A	469583480	69.2	0.362624	TRIDC1AG041700.10	ankyrin repeat family protein
	IWB7216	BS00022698_51	1A	484855332	1A	474649237	70.7	0.506476	TRIDC1AG042590.2	Chitinase 2
	IWB5807	BS00002216_51	1A	484861729	1A	474655218	70.8	0.482169	TRIDC1AG042600.4	Heat shock 70 kDa protein 3
	IWB55442	RAC875_c23081_141	1A	493616458	1A	483559317	#N/A	0.385551	TRIDC1AG043950.4	RING finger protein 5
	IWB43096	Kukri_c25215_124	1A	494645908	1A	484585226	72.7	0.454185	TRIDC1AG044070.7	S-adenosyl-L-methionine-dependent methyltransferases superfamily protein
	IWB46717	Kukri_c58155_786	1A	507262516	1A	496747426	80.2	0.576735	TRIDC1AG046540.22	undescribed protein
	IWB38369	Ku_c1313_1673	1A	516382360	1A	505746051	85.1	0.505094	TRIDC1AG048000.1	NB-ARC domain containing protein	Glu-A1
	IWA6729	wsnp_Ku_c23012_32893918	1A	518866475	1A	507876014	86.7	0.271097	TRIDC1AG048340.5	Cathepsin B-like cysteine proteinase
	IWB7257	BS00022788_51	1A	519222633	1A	508253590	87.3	0.310072	TRIDC1AG048560.6	Signal recognition particle 54 kDa protein 2
	IWB54196	RAC875_c15975_1208	1A	532705756	1A	525526354	#N/A	0.26397	TRIDC1AG051390.1	undescribed protein
	IWB6995	BS00022261_51	1A	535340668	1A	527767905	99.8	0.25231	TRIDC1AG051920.3	Heavy metal transport/detoxification superfamily protein
	IWB12579	BS00110627_51	1A	535340720	1A	527767957	99.8	0.519573	TRIDC1AG051920.3	Heavy metal transport/detoxification superfamily protein
	IWB54118	RAC875_c15593_1421	1A	556083731	1A	555599253		0.484823	TRIDC1AG057090.3	ubiquitin-conjugating enzyme 23
	IWB4839	BobWhite_rep_c50057_164	1A	579617382	1B	663334619		0.333157	TRIDC1AG062480.1	undescribed protein	Asparagine synthesase
	IWB6488	BS00011892_51	1A	582795992	1A	575077753		0.32489	TRIDC1AG063170.14	Lysine-specific demethylase 5B
	IWB10491	BS00070695_51	1A	586248352	1A	578641765	146.1	0.297996	TRIDC1AG064010.1	Retrotransposon protein, putative, unclassified
	IWB31955	GENE-0543_1074	1A	587099800	Un	6700852	146.8	0.312193	TRIDC1AG064150.7	DNA damage-binding protein 1
	IWB35982	IACX502	1B	6564658	1B	44997575	27.1	0.28817	TRIDC1BG001190.21	arginine/serine-rich splicing factor 35
	IWB64368	RFL_Contig3481_1669	1B	6994959	1B	4043109		0.279683	TRIDC1BG001290.9	Transcription initiation factor TFIID subunit 6
	IWB29371	Excalibur_c9196_313	1B	12566388	1B	10777455		0.314359	TRIDC1BG002910.6	actin 7
	IWB63564	RFL_Contig1118_1073	1B	17708933	1B	16512125	#N/A	0.30656	TRIDC1BG004170.3	Protein NRT1/ PTR FAMILY 6.2
	IWB44363	Kukri_c34793_360	1B	28584170	3A	14820416	21.7	0.33981	TRIDC1BG005880.1	unknown function
	IWB7167	BS00022590_51	1B	40730967	1B	33642910	#N/A	0.294222	TRIDC1BG006890.7	Coiled-coil domain-containing protein 130
	IWB73652	Tdurum_contig8382_300	1B	49719172	1A	26390023		0.411065	TRIDC1BG007990.2	unknown function
	IWB60559	RAC875_c79370_378	1B	64121778	1A	39718978	29.9	0.461415	TRIDC1BG010340.3	Pentatricopeptide repeat-containing protein
	IWB9190	BS00064085_51	1B	91203495	5B	654276568		0.373189	TRIDC1BG012670.3	undescribed protein
	IWB41047	Kukri_c13537_2069	1B	287369047	1B	281344939		0.381329	TRIDC1BG027120.8	undescribed protein
	IWB58936	RAC875_c53382_120	1B	291216505	1B	285102324	35.8	0.537239	TRIDC1BG027440.18	undescribed protein
	IWB51614	Ra_c26080_461	1B	303597303	4B	35028638		0.422894	TRIDC1BG028200.1	unknown function
	IWB55154	RAC875_c21274_235	1B	327331849	1B	315939077	36.9	0.574815	TRIDC1BG030050.7	TRAF-like family protein
	IWB24607	Excalibur_c27675_912	1B	328665810	1B	317190670	37.1	0.334543	TRIDC1BG030210.14	RNA-binding KH domain-containing protein
	IWB31732	GENE-0193_197	1B	373812285	1B	360706881	43	0.459032	TRIDC1BG033960.12	U1 small nuclear ribonucleoprotein 70 kDa
	IWB7716	BS00029345_51	1B	387331812	1B	374030715	43.5	0.312274	TRIDC1BG035190.8	Glycerol-3-phosphate acyltransferase, chloroplastic
	IWB71717	Tdurum_contig46780_203	1B	393803075	1B	380535699	43.6	0.330368	TRIDC1BG035630.1	unknown function	QFb.cerz-1BL.1 (BE443797_436–barc302 43.9-53.7 cM)
	IWB13980	CAP7_c302_518	1B	394368142	1B	381119093	44.1	0.340145	TRIDC1BG035650.7	unknown function
	IWA5011	wsnp_Ex_rep_c101414_86781128	1B	406481091	1A	363590226		0.256678	TRIDC1BG036910.5	unknown function
	IWB65091	RFL_Contig5706_1294	1B	453742146	1B	441845687	#N/A	0.267475	TRIDC1BG041620.3	Folate-biopterin transporter
	IWA128	wsnp_BE443332B_Ta_2_2	1B	471197107	1B	458887733	54.8	0.277353	TRIDC1BG043320.9	Peptide methionine sulfoxide reductase MsrB
	IWB11009	BS00078431_51	1B	472382595	1B	460004343	54.8	0.423229	TRIDC1BG043390.3	Pentatricopeptide repeat-containing protein	472102398 - TRIDC1BG043370.1 -Gibberellin receptor GID1 // PPDK-1B Pyruvate phosphate dikinase wsnp_BE443930B_Ta_2_2 (54.8 cM)
	IWB72647	Tdurum_contig59449_400	1B	493545058	1B	480261821	58.6	0.430367	TRIDC1BG045490.4	unknown function	472102398 - TRIDC1BG043370.1 -Gibberellin receptor GID1 // PPDK-1B Pyruvate phosphate dikinase wsnp_BE443930B_Ta_2_2 (54.8 cM)
	IWB31673	GENE-0107_807	1B	494317431	1B	481043161	59.1	0.438809	TRIDC1BG045590.9	Ribosome biogenesis GTPase A
	IWB66172	Tdurum_contig10026_1493	1B	505376416	1B	492076870	62.2	0.264465	TRIDC1BG047050.4	Alpha-amylase
	IWB5360	BobWhite_rep_c63278_349	1B	524098719	1B	511074588		0.447559	TRIDC1BG049000.5	Ribosomal protein S12/S23 family protein
	IWB6034	BS00009270_51	1B	529740465	1B	345053337	39.4	0.472609	TRIDC1BG049560.9	unknown function
	#N/A	BobWhite_c10977_834	1B	553453558	2A	40012982		0.311457	TRIDC1BG052610.2	undescribed protein
	IWB11261	BS00082521_51	1B	560802235	1B	548282255	81.2	0.437509	TRIDC1BG053500.1	undescribed protein	GYS-TKW-KNS/Glu-B1
	IWB71904	Tdurum_contig48523_1838	1B	565285702	1B	553131869	82.2	0.256391	TRIDC1BG054110.1	undescribed protein	Glu-B1
	IWA3684	wsnp_Ex_c39616_46871127	1B	567427927	1B	555077387	83.2	0.402573	TRIDC1BG054310.2	H/ACA ribonucleoprotein complex non-core subunit NAF1
	IWB59153	RAC875_c55891_712	1B	569999364	1B	557844449	84.5	0.255277	TRIDC1BG054670.2	Tetratricopeptide repeat (TPR)-like superfamily protein
	IWB26591	Excalibur_c44818_109	1B	607424078	1B	594948568	96.2	0.254028	TRIDC1BG059750.4	CASC3/Barentsz eIF4AIII binding
	IWB36329	IACX886	1B	610930699	1B	606173545	98.8	0.28882	TRIDC1BG060210.7	IQ-domain 31
	IWB27783	Excalibur_c581_1220	1B	631183963	1B	618977576	109.8	0.30442	TRIDC1BG062520.13	unknown function
	IWB71777	Tdurum_contig47253_1624	1B	632329304	1B	620136958	110.8	0.343808	TRIDC1BG062650.14	AFG1-like ATPase family protein
	IWA4155	wsnp_Ex_c5296_9365860	1B	635076912	1B	622805863	114.8	0.385297	TRIDC1BG063400.4	1,2-dihydroxy-3-keto-5-methylthiopentene dioxygenase 4
	IWB11958	BS00096498_51	1B	637102074	1B	624674846	115.7	0.564148	TRIDC1BG063850.3	Guanine nucleotide-binding protein subunit beta-like protein A
	IWB36732	Jagger_c7235_96	1B	637102221	1B	624674993	115.4	0.375024	TRIDC1BG063850.3	Guanine nucleotide-binding protein subunit beta-like protein A
	IWB74776	tplb0043k02_463	1B	638931514	1B	626565205	115.7	0.330902	TRIDC1BG064110.17	oligopeptide transporter 7
	IWB8152	BS00039135_51	1B	642445118	1B	631508008	#N/A	0.353202	TRIDC1BG064840.6	2Fe-2S iron-sulfur cluster binding domain-containing protein
	IWB11625	BS00089790_51	1B	643929510	1B	633135607	119.1	0.452075	TRIDC1BG065270.3	60S ribosomal protein L37a	HD (heading date)
	IWB22011	Excalibur_c11980_619	1B	645487211	1B	635051723	120.8	0.492907	TRIDC1BG065590.3	unknown function
	IWB44899	Kukri_c39223_871	1B	645487808	1B	635052320	120.8	0.532952	TRIDC1BG065590.3	unknown function	PH-TKW
	IWB30890	Excalibur_rep_c67747_629	1B	645776929	1B	635342968	121.3	0.476513	TRIDC1BG065720.10	ubiquitin-conjugating enzyme 23
	IWB10224	BS00068077_51	1B	655297033	1B	645141018	130.2	0.266609	TRIDC1BG067580.7	F-box family protein with a domain of unknown function (DUF295)
	IWB73738	Tdurum_contig8840_575	1B	656607280	1B	646104755	135.3	0.309506	TRIDC1BG067850.4	IMP dehydrogenase/GMP reductase
	IWB8409	BS00045568_51	1B	658372097	1B	647880338	136.1	0.354764	TRIDC1BG068070.1	PETER PAN-like protein	TaHXK5-TaGA20ox4 -PH-NET-HD-PH
	IWB8817	BS00060686_51	1B	677133286	1B	665836102	152.5	0.283008	TRIDC1BG072260.5	undescribed protein
	IWB1342	BobWhite_c20073_443	1B	679793005	1B	668923129	156.3	0.314239	TRIDC1BG072840.8	Cytoplasmic membrane protein
	IWA4525	wsnp_Ex_c649_1279852	1B	682519208	1B	671995124	160.5	0.252741	TRIDC1BG073430.1	undescribed protein
	IWB71971	Tdurum_contig49509_606	1B	686384991	1B	677170065	162.5	0.483925	TRIDC1BG074080.21	Protein kinase superfamily protein	GY-HD-TKW-KNS
	IWB59140	RAC875_c5577_1682	2A	4571402	2A	5160582	#N/A	0.371331	TRIDC2AG001410.9	Sterol 3-beta-glucosyltransferase
	IWB22184	Excalibur_c12980_2621	2A	6226125	2A	7224805	9.4	0.289449	TRIDC2AG001690.3	Coiled-coil protein
	IWB46988	Kukri_c62277_80	2A	60499157	2A	56905007		0.253431	TRIDC2AG012460.7	E3 ubiquitin-protein ligase SHPRH
	IWB872	BobWhite_c1611_1685	2A	64231046	2A	60411691	#N/A	0.398585	TRIDC2AG013090.5	acyl-CoA dehydrogenase-related
	IWA5893	wsnp_JD_c18695_17091254	2A	75554041	2A	70547798	78	0.252621	TRIDC2AG014970.11	Phage shock protein A homolog
	IWB22047	Excalibur_c12169_1088	2A	85796452	2A	81739185	#N/A	0.361284	TRIDC2AG016980.4	chaperone protein dnaJ-related
	IWB66114	TA013564-0487	2A	88008041	2A	83699787	#N/A	0.27886	TRIDC2AG017320.4	Protein BREAST CANCER SUSCEPTIBILITY 1 homolog
	IWB42620	Kukri_c22235_1547	2A	124769872	3B	786404075		0.366814	TRIDC2AG021310.17	sucrose synthase 4
	IWB70024	Tdurum_contig30451_88	2A	597900804	2A	597038819	121.3	0.535986	TRIDC2AG052100.3	F-box protein
	IWB25530	Excalibur_c34913_743	2A	617813318	2A	618210550	131.1	0.255981	TRIDC2AG055020.4	phenylalanine ammonia-lyase 2
	IWB9073	BS00063518_51	2A	630057738	2A	630671301	131.7	0.268906	TRIDC2AG056010.1	undescribed protein	BCH1 (CHYB1, HYD1) Carotenoid β-ring hydroxylase (β-hydroxylase 1) (BobWhite_c34273_67 133.1 cM)
	IWB34603	IAAV2718	2A	674085358	2A	675832863	144	0.361089	TRIDC2AG061670.21	Protein strawberry notch homolog 1	BCH1 (CHYB1, HYD1) Carotenoid β-ring hydroxylase (β-hydroxylase 1) (BobWhite_c34273_67 133.1 cM)
	IWB32429	GENE-1381_110	2A	684186146	2A	685560391	145.9	0.278987	TRIDC2AG063240.5	Clathrin interactor EPSIN 1
	IWA200	wsnp_be471201A_Ta_1_1	2A	684188228	2A	685562439	145.8	0.378196	TRIDC2AG063240.6	Clathrin interactor EPSIN 1
	IWB2961	BobWhite_c3833_815	2A	686054164	2A	690225260	145.9	0.374594	TRIDC2AG063500.8	Protein kinase family protein
	IWB11614	BS00089497_51	2A	687836595	2A	688361342	#N/A	0.308153	TRIDC2AG063730.10	Vacuolar cation/proton exchanger 1b
	IWB13648	CAP12_rep_c6956_169	2A	690377743	2A	691749827	146.5	0.47908	TRIDC2AG064000.9	PLATZ transcription factor family protein
	IWB11977	BS00096882_51	2A	694101919	2A	695410154	148	0.400873	TRIDC2AG064430.7	ABC transporter C family member 9
	IWB44999	Kukri_c40121_373	2A	697505186	2A	698938206	150.4	0.294673	TRIDC2AG065000.1	undescribed protein
	IWB7714	BS00029332_51	2A	698535712	2A	700013123	152.5	0.510166	TRIDC2AG065220.10	unknown function
	IWB30356	Excalibur_rep_c108662_132	2A	701907032	2B	671673693	154.6	0.279642	TRIDC2AG065800.2	F-box/WD-40 repeat-containing protein
	IWB12761	CAP11_c2194_115	2A	702042071	2A	703465517	#N/A	0.269115	TRIDC2AG065830.1	Cytochrome P450 superfamily protein
	IWB49008	Kukri_rep_c104611_210	2A	702828329	2A	704410524	154.6	0.368298	TRIDC2AG065960.5	Disease resistance protein
	IWB53236	RAC875_c110838_165	2A	705639488	2A	706929197		0.552142	TRIDC2AG066500.2	unknown function
	IWB57860	RAC875_c42648_115	2A	709157028	2A	710367657	159.1	0.629349	TRIDC2AG067210.1	undescribed protein	705236994 -TRIDC2AG066420.3 -Polyphenol oxidase 1
	IWA4375	wsnp_Ex_c59095_60108185	2A	709489657	2A	710631852	158.7	0.755428	TRIDC2AG067360.1	Zinc finger BED domain-containing protein RICESLEEPER 1	HD-TKW-KNS
	IWB11143	BS00080752_51	2A	711379344	2A	715768389	159.9	0.362579	TRIDC2AG067940.17	unknown function
	IWB11193	BS00081506_51	2A	711747350	2A	716162068	159.9	0.615513	TRIDC2AG068080.2	dihydroflavonol 4-reductase
	IWA1960	wsnp_Ex_c14953_23104041	2A	721812347	2A	726064385	169.3	0.331295	TRIDC2AG070190.2	Alpha-1,4-glucan-protein synthase [UDP-forming]
	IWB8706	BS00057059_51	2A	722385735	2A	726695462	169.3	0.251963	TRIDC2AG070380.1	undescribed protein	GS2-2A Glutamine synthetase BS00057059_51 (169.3)
	IWB56398	RAC875_c29913_139	2A	728179249	2B	719779257		0.290488	TRIDC2AG071660.2	D-3-phosphoglycerate dehydrogenase	GS2-2A Glutamine synthetase BS00057059_51 (169.3)
	IWA5959	wsnp_JD_c2578_3489735	2A	728474126	2A	732715789	176.5	0.293339	TRIDC2AG071750.3	Protein kinase superfamily protein
	IWB73879	Tdurum_contig93508_295	2A	731835054	2A	735935007	179.5	0.26586	TRIDC2AG072300.4	RING/U-box superfamily protein
	IWB75255	tplb0060h04_139	2A	739313579	2A	743671308	186.1	0.455668	TRIDC2AG073780.2	undescribed protein
	IWB3746	BobWhite_c5178_188	2A	743655355	2A	748394656	189.8	0.253819	TRIDC2AG075170.2	undescribed protein
	IWB836	BobWhite_c15773_166	2A	744219155	2A	748648912	189.8	0.294387	TRIDC2AG075340.4	ubiquitin conjugating enzyme 9
	IWB2628	BobWhite_c33464_133	2A	748191428	2B	754995781		0.255645	TRIDC2AG076550.3	Adenylate kinase
	IWB61157	RAC875_c96399_610	2A	750727497	2B	734665857	197.6	0.338225	TRIDC2AG076930.1	Pectinesterase
	IWB5439	BobWhite_rep_c64068_241	2A	754830326	2B	763327538		0.28391	TRIDC2AG077900.2	Pentatricopeptide repeat-containing protein
	IWB63210	RAC875_rep_c83950_222	2A	754880508	1A	24428904	#N/A	0.257534	TRIDC2AG077960.4	unknown function
	IWB66206	Tdurum_contig10048_447	2A	756134228	2A	760420202		0.513793	TRIDC2AG078330.20	Endonuclease MutS2
	IWA4491	wsnp_Ex_c63909_62932437	2A	773844194	2A	774813864	210.8	0.585024	TRIDC2AG082150.9	Acyl-CoA N-acyltransferase with RING/FYVE/PHD-type zinc finger protein
	IWB46267	Kukri_c52608_142	2A	774530913	2A	774258543	208.7	0.348644	TRIDC2AG082310.4	oligopeptide transporter 4
	IWB25535	Excalibur_c34937_710	2B	4329729	2B	6711112	5.9	0.548732	TRIDC2BG001200.3	Protein transport protein Sec24-like
	IWB62322	RAC875_rep_c115433_378	2B	7007561	2B	9360474	7.9	0.400389	TRIDC2BG001590.1	von Willebrand factor D and EGF domain-containing protein
	IWB45010	Kukri_c40204_617	2B	7838914	2B	10002023	8.3	0.27891	TRIDC2BG001760.6	Integral membrane protein hemolysin-III homolog
	IWB75174	tplb0058j01_762	2B	21052161	2B	24934813	19.4	0.266064	TRIDC2BG004630.4	unknown function
	IWB20002	Ex_c17993_470	2B	39354332	3A	3455035		0.28687	TRIDC2BG007890.12	receptor-like protein kinase 4
	IWA7916	wsnp_Ra_c407_862316	2B	54659987	2B	52972480	44.2	0.519002	TRIDC2BG010430.14	NAD-dependent protein deacetylase
	IWB43273	Kukri_c26288_419	2B	58281791	2B	56658355	45.1	0.335517	TRIDC2BG010890.5	PWWP domain protein-like	Ppd-2B
	IWA3868	wsnp_Ex_c4349_7841003	2B	58832750	2B	57179677	45.1	0.550472	TRIDC2BG010970.4	Elongation factor 1-alpha	Ppd-2B
	IWB59624	RAC875_c61801_299	2B	69430000	2B	66725045	48.2	0.2982	TRIDC2BG012020.1	undescribed protein
	IWB56961	RAC875_c34516_316	2B	69798116	2B	66998785	48.4	0.520262	TRIDC2BG012110.6	Heat stress transcription factor A-2b
	IWB63381	RAC875_rep_c99492_65	2B	96002101	2A	56895402	58.2	0.275457	TRIDC2BG015240.6	E3 ubiquitin-protein ligase SHPRH
	IWB44618	Kukri_c36879_83	2B	102586519	2B	96408120	60	0.319351	TRIDC2BG016100.7	acyl-CoA dehydrogenase-related
	IWB10430	BS00070001_51	2B	128397982	2B	121400847	70.1	0.337046	TRIDC2BG019500.3	Pentatricopeptide repeat-containing protein	Fd-GOGAT -2B Fd-Glutamate synthase	Nigro et al. 2019
	IWB38861	Ku_c23446_2209	2B	139615608	2B	132290917	72.1	0.301476	TRIDC2BG020460.4	Hepatoma-derived growth factor
	IWB74034	Tdurum_contig98206_211	2B	143020458	2B	136096612	73.7	0.374275	TRIDC2BG021020.3	BSD domain-containing protein
	IWB62870	RAC875_rep_c72435_90	2B	143020836	2B	136096890	73.2	0.52992	TRIDC2BG021020.3	BSD domain-containing protein
	IWB9911	BS00066905_51	2B	143112669	2B	136258880	#N/A	0.26261	TRIDC2BG021030.8	DNA repair protein-related
	IWB47512	Kukri_c7139_6288	2B	145622861	2A	86695116	73.7	0.358144	TRIDC2BG021380.12	Transformation/transcription domain-associated protein
	IWB39049	Ku_c28266_279	2B	145631972	2B	139180344	#N/A	0.354204	TRIDC2BG021380.13	Transformation/transcription domain-associated protein
	IWB34469	IAAV1903	2B	186849423	2B	174375361	84	0.443796	TRIDC2BG026200.5	Alpha/beta hydrolase domain-containing protein 13
	IWA4606	wsnp_Ex_c7003_12065828	2B	213285018	2B	205398993	87.7	0.666243	TRIDC2BG029240.2	Major facilitator superfamily protein	plant height
	IWB11014	BS00078506_51	2B	213874720	2B	205979450	87.7	0.315578	TRIDC2BG029360.8	alpha/beta-Hydrolases superfamily protein
	IWA7520	wsnp_Ku_rep_c73313_72887199	2B	216214997	2B	208384507	89.7	0.323424	TRIDC2BG029650.4	Protein kinase superfamily protein
	IWB5274	BobWhite_rep_c61602_139	2B	240701772	2B	232865798	90.8	0.262709	TRIDC2BG031750.1	V-type proton ATPase subunit H
	IWB43921	Kukri_c3096_1411	2B	314625763	2B	314134282	93.2	0.268906	TRIDC2BG035970.33	Mediator of RNA polymerase II transcription subunit 33A
	IWA5256	wsnp_Ex_rep_c66524_64799410	2B	442988004	2B	435141726	96.2	0.262109	TRIDC2BG045390.12	histidinol dehydrogenase	VDE Violaxanthin de-epoxidase wsnp_Ex_c9805_16183499 94.2 cM
	IWB951	BobWhite_c16735_131	2B	443642639	2B	435844137	96.5	0.281869	TRIDC2BG045500.4	Calcineurin-like metallo-phosphoesterase superfamily protein
	IWB46528	Kukri_c55599_153	2B	454801139	2B	448133538	100.7	0.527028	TRIDC2BG046700.3	Protein GrpE
	IWB72819	Tdurum_contig61682_187	2B	474980368	2B	468493123	100.7	0.453299	TRIDC2BG048650.1	Signal peptidase complex subunit 2
	IWB51163	Ra_c15365_530	2B	524464705	2B	515125122	108.2	0.299665	TRIDC2BG053680.3	glycine-rich protein .
	IWA1036	wsnp_CAP7_c1453_728076	2B	525347613	2B	516034812	108.2	0.459236	TRIDC2BG053780.9	Serine incorporator 3
	IWB67747	Tdurum_contig12836_418	2B	528712939	2B	519703127	108.9	0.38652	TRIDC2BG054200.5	Cytochrome b561 and DOMON domain-containing protein
	IWA2955	wsnp_Ex_c25217_34481787	2B	543195239	2B	534105181	108.2	0.262091	TRIDC2BG055480.5	Leucine-rich receptor-like protein kinase family protein
	IWB73809	Tdurum_contig92604_368	2B	546900973	2B	537614390	112.3	0.27828	TRIDC2BG055970.1	BTB/POZ domain-containing protein
	IWB69271	Tdurum_contig26542_457	2B	553914829	2B	544739264	114.4	0.259416	TRIDC2BG056750.13	RNA polymerase II C-terminal domain phosphatase-like 1
	IWB68044	Tdurum_contig13653_471	2B	562933274	2B	554908560	131.1	0.253349	TRIDC2BG057690.11	Nucleotide/sugar transporter family protein
	IWB39170	Ku_c3202_1646	2B	574246692	2B	566353243		0.277996	TRIDC2BG058880.16	Formin Homology 14
	IWB42187	Kukri_c19751_873	2B	592191562	2B	584626735	120.2	0.371478	TRIDC2BG060350.4	3-oxo-5-alpha-steroid 4-dehydrogenase family protein
	IWB38293	Ku_c12037_482	2B	608458978	2B	601018578	123.4	0.512362	TRIDC2BG061780.2	Lysine-specific histone demethylase 1 homolog 3	HD
	IWA7825	wsnp_Ra_c28955_38371323	2B	609520719	2B	602075884	124.4	0.281838	TRIDC2BG062040.13	FGGY family of carbohydrate kinase
	IWB37941	JG_c2092_196	2B	617138512	Un	38305717	124.9	0.267116	TRIDC2BG062960.1	ABC transporter permease
	IWA3973	wsnp_Ex_c46576_52042185	2B	629503133	2B	622827390	126.6	0.378427	TRIDC2BG064370.4	Potassium transporter family protein	HD
	IWB52020	Ra_c4051_1010	2B	633667054	2B	627225509	127.6	0.277797	TRIDC2BG065010.2	terpene synthase 04
	IWB67608	Tdurum_contig12459_491	2B	648273517	2B	640486293	130.1	0.316406	TRIDC2BG066750.2	unknown function
	IWB7433	BS00023124_51	2B	681826601	2B	673038937	137.9	0.259338	TRIDC2BG071010.6	Disease resistance protein
	IWB73472	Tdurum_contig80351_311	2B	681827097	2B	673039333		0.412224	TRIDC2BG071010.6	Disease resistance protein
	IWB28807	Excalibur_c76665_98	2B	684126771	2B	675427507	137.9	0.302677	TRIDC2BG071320.5	Protein kinase family protein
	IWB43934	Kukri_c31059_130	2B	688492841	2B	617014047	140.3	0.303552	TRIDC2BG072060.13	unknown function	685890676 - TRIDC2BG071520.1 - Polyphenol oxidase, chloroplastic
	IWB28504	Excalibur_c685_165	2B	695092195	2A	714624739		0.583846	TRIDC2BG073150.5	unknown function	685890676 - TRIDC2BG071520.1 - Polyphenol oxidase, chloroplastic
	IWB67759	Tdurum_contig12879_1200	2B	708090071	2B	700141568	146.5	0.316252	TRIDC2BG074720.5	Carboxypeptidase Y
	IWB2593	BobWhite_c32938_264	2B	710585906	2B	703331516	146.8	0.306942	TRIDC2BG075140.14	Endoribonuclease YbeY
	IWB10182	BS00067907_51	2B	718202231	2B	710148576		0.455775	TRIDC2BG076060.2	BTB/POZ domain-containing protein 9	GS2-2B Glutamine synthetase wsnp_Ra_c4660_8405634 (148 cM)
	IWB62592	RAC875_rep_c69619_145	2B	726867100	2B	717967745	176.5	0.25256	TRIDC2BG077140.6	jasmonate-zim-domain protein 12	GS2-2B Glutamine synthetase wsnp_Ra_c4660_8405634 (148 cM)
	IWA3938	wsnp_Ex_c45468_51254978	2B	728666471	2B	719777934	151.3	0.26926	TRIDC2BG077540.1	D-3-phosphoglycerate dehydrogenase
	IWB58646	RAC875_c50422_299	2B	729463346	2B	720428214	152.6	0.414069	TRIDC2BG077610.1	Protein kinase superfamily protein
	IWA8406	wsnp_RFL_Contig2914_2757372	2B	737067899	2B	727248831	153.4	0.445226	TRIDC2BG078330.4	Crossover junction endonuclease EME1
	IWB28183	Excalibur_c63243_434	2B	740918628	2B	729804410		0.353881	TRIDC2BG078910.14	undescribed protein
	IWA5809	wsnp_JD_c12346_12606967	2B	743750286	2B	732290078	158.3	0.303929	TRIDC2BG079400.4	cullin 3
	IWB29591	Excalibur_c9752_619	2B	759299893	2B	746803809	165.7	0.272527	TRIDC2BG082490.3	Phosphatidylinositol 4-kinase gamma 6
	IWB64039	RFL_Contig2751_1562	2B	774776419	2B	762924829	173.7	0.406974	TRIDC2BG085210.15	ankyrin repeat family protein
	IWB40456	Kukri_c10869_1591	2B	774949870	2B	763124316	172.4	0.345599	TRIDC2BG085320.8	paralog of ARC6
	IWB24454	Excalibur_c26527_82	2B	776367864	2B	765318692	174.7	0.256444	TRIDC2BG085700.1	Lipase/lipooxygenase, PLAT/LH2 family protein
	IWB32211	GENE-1056_55	2B	779009499	2A	760419903	175.6	0.394977	TRIDC2BG086400.5	Endonuclease MutS2
	IWB21105	Ex_c67202_741	2B	783475550	2B	770790069	#N/A	0.523827	TRIDC2BG087070.3	beta glucosidase 13
	IWA5093	wsnp_Ex_rep_c103381_88353000	2B	783921414	2B	771868560	180.1	0.517741	TRIDC2BG087090.1	4-hydroxy-7-methoxy-3-oxo-3,4-dihydro-2H-1, 4-benzoxazin-2-yl glucoside beta-D-glucosidase 1d, chloroplastic
	IWB5978	BS00004413_51	2B	785538150	2B	772626491	182.7	0.309144	TRIDC2BG087250.5	RNA pyrophosphohydrolase
	IWB10624	BS00072840_51	2B	789671877	Un	324608223	181.6	0.455775	TRIDC2BG088110.2	Glutathione S-transferase family protein	grain C / survival C	Guo et al. 2017
	IWB74736	tplb0042a21_1091	2B	791585128	2B	779015671	185.7	0.5713	TRIDC2BG088530.3	Prenylcysteine oxidase
	IWB32029	GENE-0676_322	2B	796551637	2B	784100454		0.619732	TRIDC2BG089850.5	DDB1- and CUL4-associated factor homolog 1
	IWB36767	Jagger_c8039_67	3A	2960240	3A	2666898	9	0.258662	TRIDC3AG000800.27	Leucine--tRNA ligase
	IWB57531	RAC875_c3956_275	3A	5132935	Un	52819213		0.264374	TRIDC3AG001400.11	sucrose phosphate synthase 1F
	IWB60283	RAC875_c7060_67	3A	6909652	3A	4325500	5.3	0.358036	TRIDC3AG002100.5	U-box domain-containing protein 4
	IWA851	wsnp_CAP11_rep_c4157_1965583	3A	19085713	3A	16511896	16.5	0.539597	TRIDC3AG003990.15	sugar transporter 9
	IWB26667	Excalibur_c4548_2505	3A	22725522	3A	20289734	20.9	0.295594	TRIDC3AG004910.5	synaptotagmin A
	IWB52965	RAC875_c10246_839	3A	44359240	3A	43943524		0.284089	TRIDC3AG009120.6	Plant/mmn10-180 protein
	IWA8480	wsnp_RFL_Contig3529_3696847	3A	474351313	3A	470072128		0.283709	TRIDC3AG037280.2	KRR1 small subunit processome component homolog
	IWB44046	Kukri_c31964_56	3A	575150378	3A	570400433		0.367568	TRIDC3AG048030.5	undescribed protein
	IWB72528	Tdurum_contig56731_335	3A	638377992	3A	633329612	109.1	0.314978	TRIDC3AG056190.6	U-box domain-containing protein 45
	IWB60569	RAC875_c79551_167	3A	662009944	3A	657600068	122.7	0.271128	TRIDC3AG060120.9	unknown function
	IWB36105	IACX6065	3A	691835148	3A	685995549	#N/A	0.402897	TRIDC3AG064870.5	Regulator of Vps4 activity in the MVB pathway protein
	IWA2518	wsnp_Ex_c20250_29303152	3A	692562654	3A	687446416	136.5	0.69878	TRIDC3AG064940.12	Bifunctional purine biosynthesis protein PurH
	IWB7045	BS00022368_51	3A	694180277	3A	689044090	140.5	0.587513	TRIDC3AG065420.1	undescribed protein
	IWB11992	BS00097265_51	3A	698355596	3A	691995053	141.5	0.408722	TRIDC3AG066070.7	Vesicle-associated membrane protein-associated protein A
	IWB12651	CAP11_c1022_117	3A	711466933	3A	705433237	148.5	0.467859	TRIDC3AG068260.1	annexin 5
	IWB7482	BS00023222_51	3A	711890783	3A	705871766	150.1	0.416621	TRIDC3AG068460.1	undescribed protein
	IWB72476	Tdurum_contig55841_351	3A	720701639	3A	713344599	159.1	0.368314	TRIDC3AG069940.7	Beta-galactosidase
	IWB833	BobWhite_c15763_205	3A	726594370	3A	720323316		0.694108	TRIDC3AG070970.3	Signal recognition particle receptor FtsY
	IWB29214	Excalibur_c878_1249	3B	5531190	3B	4455202		0.630983	TRIDC3BG001530.2	Disease resistance protein
	IWA4796	wsnp_Ex_c8360_14085858	3B	6286848	3B	5563885	5.2	0.292081	TRIDC3BG001730.5	TPX2 (targeting protein for Xklp2) protein family
	IWB11317	BS00083706_51	3B	7165817	Un	52816397	6	0.340582	TRIDC3BG002130.6	sucrose phosphate synthase 1F
	IWB3026	BobWhite_c3902_175	3B	10448189	3B	9108448	7.6	0.305044	TRIDC3BG003040.2	basic helix-loop-helix (bHLH) DNA-binding superfamily protein
	IWB75221	tplb0059m03_1516	3B	10674665	3B	9313230	7.7	0.346101	TRIDC3BG003090.10	Pentatricopeptide repeat-containing protein
	IWB12639	BS00111294_51	3B	12304535	3B	10877344	#N/A	0.374634	TRIDC3BG003550.1	undescribed protein
	IWB59448	RAC875_c5966_1854	3B	13091024	3A	2169169	9.6	0.307498	TRIDC3BG003810.4	demeter-like 2
	IWB73471	Tdurum_contig80344_144	3B	13986394	Un	53221241	10.4	0.33525	TRIDC3BG004010.9	ATP-dependent RNA helicase A
	IWB74707	tplb0041e10_1230	3B	20232152	3B	17838536	16.7	0.295685	TRIDC3BG004980.2	WD repeat-containing protein 1
	IWB36123	IACX6214	3B	21677891	3B	20420670	18.6	0.341802	TRIDC3BG005310.1	Bowman-Birk type trypsin inhibitor
	IWB6626	BS00016407_51	3B	56094456	3B	55504028	41.3	0.286923	TRIDC3BG010780.2	unknown function
	IWB14564	CAP8_c1799_237	3B	62847403	3B	61998805	45.3	0.26886	TRIDC3BG011880.4	triosephosphate isomerase
	IWB45903	Kukri_c48750_1416	3B	74336483	3B	73526414	50.3	0.591354	TRIDC3BG013750.21	RNA recognition motif (RRM)-containing protein	HD/ARL/YP/FHB
	IWB23630	Excalibur_c21372_142	3B	75144108	3B	74287173	51.9	0.476387	TRIDC3BG013970.7	Protein of unknown function (DUF1664)	HD/ARL/YP/FHB
	IWB65426	TA001643-0728	3B	202990882	3B	209655677		0.317002	TRIDC3BG025900.1	unknown function
	IWB45547	Kukri_c45609_882	3B	211023551	3B	229482084	75.2	0.348113	TRIDC3BG026740.19	C2 domain-containing protein
	IWB23177	Excalibur_c18641_1849	3B	217517347	3B	236559637	75.6	0.361198	TRIDC3BG027450.1	undescribed protein
	IWB44637	Kukri_c37029_761	3B	238373815	3B	257857526	#N/A	0.416576	TRIDC3BG029050.1	Splicing factor 3A subunit 1
	IWB64939	RFL_Contig5246_1091	3B	457444385	3B	450966954	81.1	0.309382	TRIDC3BG041630.1	EEIG1/EHBP1 protein amino-terminal domain protein
	IWB38025	Ku_c1005_1173	3B	474037814	3B	467698885	#N/A	0.324885	TRIDC3BG043410.4	proliferating cell nuclear antigen 2
	IWB66016	TA005793-0515	3B	480852034	3B	475421856	#N/A	0.536314	TRIDC3BG043880.11	Symplekin
	IWB8396	BS00045330_51	3B	484654668	3B	478917217	85.4	0.282187	TRIDC3BG044310.5	Alpha/beta hydrolase domain-containing protein 13
	IWB58035	RAC875_c44365_203	3B	485018726	3B	479274959	85.7	0.469641	TRIDC3BG044320.7	zinc finger protein-related	NADH-GOGAT -3B NADH-Glutamate synthase Tdurum_contig42234_4440 86.6 cM
	IWA8465	wsnp_RFL_Contig3396_3515504	3B	553643032	3B	538963173		0.333738	TRIDC3BG050380.10	F-box only protein 21
	IWB35937	IACX3871	3B	573514851	3B	545443598	97.2	0.498411	TRIDC3BG052700.7	Adenine nucleotide alpha hydrolases-like superfamily protein
	IWB38055	Ku_c101932_436	3B	575186726	3B	699256784	97.2	0.297865	TRIDC3BG052870.10	unknown function
	IWB74910	tplb0048g05_866	3B	620410967	5A	507196211		0.317491	TRIDC3BG057580.1	undescribed protein
	IWB63601	RFL_Contig1291_309	3B	636355882	3B	631886414	#N/A	0.420103	TRIDC3BG058950.2	Protein of unknown function (DUF 3339)
	IWB65390	TA001383-0516	3B	670346431	3B	662826329		0.333351	TRIDC3BG062350.10	tetratricopeptide repeat (TPR)-containing protein
	IWB10137	BS00067748_51	3B	673731297	3B	666484475	108.1	0.411816	TRIDC3BG062740.8	ABC transporter C family member 5
	IWB51803	Ra_c3129_2015	3B	682912285	3B	675941701	123.7	0.341257	TRIDC3BG063970.7	BTB/POZ and TAZ domain-containing protein 4
	IWB8984	BS00063034_51	3B	695517203	3B	689232261	129.6	0.507367	TRIDC3BG065590.1	undescribed protein
	IWB27956	Excalibur_c60319_127	3B	732131833	3B	730079306	133	0.355072	TRIDC3BG069310.1	unknown function
	IWA6513	wsnp_Ku_c14082_22272647	3B	743902566	3B	741087642	138	0.474666	TRIDC3BG071040.11	beta glucosidase 11
	IWB38408	Ku_c13676_1074	3B	743951666	3B	741144264	#N/A	0.439291	TRIDC3BG071050.6	Disease resistance protein
	IWA2462	wsnp_Ex_c19778_28779907	3B	752468209	3B	749356027	144.8	0.285394	TRIDC3BG072560.2	Conserved oligomeric Golgi complex subunit 4
	IWB10980	BS00077967_51	3B	762118144	3B	758874178	#N/A	0.570692	TRIDC3BG074040.5	undescribed protein
	IWB11409	BS00085434_51	3B	762882426	3B	759676912	#N/A	0.451939	TRIDC3BG074250.3	Tetraspanin family protein
	IWB12091	BS00099738_51	3B	772933988	3B	770611618	155.5	0.361482	TRIDC3BG075510.2	undescribed protein
	IWB43985	Kukri_c31523_367	3B	784353932	3B	782362995		0.300987	TRIDC3BG077330.9	acetyl-CoA carboxylase 1
	IWB7540	BS00024499_51	3B	787686062	3B	785393753	169.5	0.378313	TRIDC3BG077850.1	unknown function
	IWB4609	BobWhite_c9424_243	3B	788276160	3B	785897864	169.8	0.267685	TRIDC3BG077950.1	undescribed protein
	IWB69415	Tdurum_contig28053_218	3B	808817831	3B	803896480	187.6	0.40405	TRIDC3BG081270.1	undescribed protein
	IWB11431	BS00085966_51	3B	828199091	3B	821929833	201.1	0.255355	TRIDC3BG085240.15	villin 4
	IWB33242	GENE-3126_21	4A	1086200	4B	4097703		0.32034	TRIDC4AG000110.8	Sn1-specific diacylglycerol lipase alpha
	IWB8008	BS00035307_51	4A	3988989	4A	755700	2.3	0.288692	TRIDC4AG000870.2	Bowman-Birk type trypsin inhibitor
	IWB52625	Ra_c74035_586	4A	17295183	4A	16519685	16.9	0.359082	TRIDC4AG003290.3	Protein of unknown function, DUF593
	IWB71865	Tdurum_contig48049_807	4A	37993770	4A	37150367	36.2	0.624316	TRIDC4AG006400.7	cyclin-related
	IWA4321	wsnp_Ex_c5690_9994334	4A	38924878	4A	38036274	37.8	0.574447	TRIDC4AG006580.6	undescribed protein
	IWB74057	Tdurum_contig9906_89	4A	45363622	4A	44605698	39	0.388073	TRIDC4AG007320.1	undescribed protein
	IWB43360	Kukri_c26943_862	4A	550276216	4A	549908702		0.372357	TRIDC4AG038790.3	Pentatricopeptide repeat-containing protein
	IWB25253	Excalibur_c32735_603	4A	578009266	4A	577396352	72.1	0.380393	TRIDC4AG042870.2	Adenylosuccinate synthetase	575088221 Rht-A1
	IWA4199	wsnp_Ex_c539_1072859	4A	590033932	4A	589331539	80.8	0.439512	TRIDC4AG045850.7	5-methyltetrahydropteroyltriglutamate--homocysteine methyltransferase 2	577929780- TRIDC4AG042820.10 - lipoxygenase 3
	IWB58408	RAC875_c48107_65	4A	590301270	4A	589570189	81.4	0.329383	TRIDC4AG045970.11	cationic amino acid transporter 2
	IWB56959	RAC875_c34515_343	4A	615630224	4A	617606418	#N/A	0.363522	TRIDC4AG051800.1	Aspartic proteinase nepenthesin-2
	IWB8782	BS00059503_51	4A	629409038	4A	632648861	114.6	0.27487	TRIDC4AG054530.2	PLANT CADMIUM RESISTANCE 2
	IWB26429	Excalibur_c4325_1440	4A	633814981	4A	636727466	118.5	0.276088	TRIDC4AG055380.1	undescribed protein
	IWB68425	Tdurum_contig15586_563	4A	633906931	4A	636822057	120	0.282159	TRIDC4AG055440.6	RNA-binding protein 1
	IWB5608	BobWhite_rep_c66361_594	4A	715175771	4A	725094752	167.5	0.29917	TRIDC4AG069440.3	Protein CWC15 homolog
	IWB60136	RAC875_c67909_226	4A	715775645	Un	79948787	167.1	0.26283	TRIDC4AG069730.3	Kelch repeat-containing protein	4AL QFb.cerz-4AL.2 wmc219–psr573.2//Wx-B1 gwm 219 (Liu et al. 2015)
	IWB22429	Excalibur_c14401_743	4B	2007477	4B	1400834	0.3	0.267167	TRIDC4BG000600.3	beta-amylase 2
	IWB65491	TA002019-0994	4B	4508722	4A	597248280	0.3	0.374917	TRIDC4BG001530.1	undescribed protein
	IWA506	wsnp_BF483640B_Ta_2_2	4B	9079966	4B	9123607	6	0.27949	TRIDC4BG002360.4	Uncharacterized conserved protein (DUF2215)
	IWB66459	Tdurum_contig10322_1908	4B	11025339	4B	11075307	10	0.405719	TRIDC4BG002820.9	Membralin
	IWB8084	BS00037094_51	4B	11969111	4B	12047851	12.8	0.483064	TRIDC4BG003050.25	undescribed protein
	IWB74821	tplb0045c06_1675	4B	12128923	4B	12214283	12.8	0.408472	TRIDC4BG003110.4	Vicilin
	IWB71830	Tdurum_contig47622_234	4B	12544683	4B	12561995	13.3	0.488584	TRIDC4BG003260.7	ARM repeat superfamily protein
	IWB63894	RFL_Contig2277_1527	4B	12556029	4B	12573269	12.8	0.574811	TRIDC4BG003290.2	Pleckstrin homology (PH) domain-containing protein
	IWB70174	Tdurum_contig31139_79	4B	13084979	Un	81535058	14.4	0.40656	TRIDC4BG003320.4	Transmembrane protein 56
	IWB45994	Kukri_c49506_396	4B	14608368	4B	16460101	17.6	0.260611	TRIDC4BG003810.17	ERD (early-responsive to dehydration stress) family protein
	IWB48055	Kukri_c8594_203	4B	16134349	4B	16668969	17.7	0.395833	TRIDC4BG004150.1	ankyrin repeat family protein	14921313 - TRIDC4BG003830.1 -Growth-regulating factor 9
	IWA3290	wsnp_Ex_c30695_39579408	4B	19641887	4B	19845244	19.3	0.347299	TRIDC4BG004610.1	ubiquitin-protein ligase 7
	IWB7078	BS00022431_51	4B	23524456	4B	23204984	22.5	0.618253	TRIDC4BG005540.18	undescribed protein	PH/ARL/KNS
	IWB73564	Tdurum_contig82378_561	4B	33763225	4B	33909147	34.4	0.458206	TRIDC4BG007500.2	NADH-ubiquinone oxidoreductase 75 kDa subunit	pasta_b*/pigLoss/Rht-B1
	IWB70449	Tdurum_contig33737_157	4B	35774710	4B	35982154	35	0.674357	TRIDC4BG007730.7	GPN-loop GTPase 3	KNS/TG
	IWB12982	CAP11_c601_120	4B	36796552	4B	37188538	35.2	0.345378	TRIDC4BG007870.7	histidine kinase 3
	IWB35611	IAAV971	4B	38801541	4B	39157292	36.1	0.449948	TRIDC4BG008140.5	Protein kinase superfamily protein	LpxB1
	IWB6994	BS00022258_51	4B	43204978	4B	44119935	38	0.347299	TRIDC4BG008730.9	FIP1
	IWB65619	TA002925-3757	4B	60914779	4B	61572674	40.5	0.355037	TRIDC4BG010640.5	serine hydroxymethyltransferase 2	GPC/GY-PH- HD-TKW/SHI/pasta_b*/pigLoss
	IWB72792	Tdurum_contig61465_781	4B	83693482	4B	84559318	42	0.355961	TRIDC4BG013390.1	Protein transport protein SEC23	GY-PH- HD-TKW/pasta a
	IWB9576	BS00065533_51	4B	383171827	1B	456360566		0.324781	TRIDC4BG031240.18	ABC transporter B family member 25, mitochondrial
	IWB9406	BS00064935_51	4B	411335265	4B	422905679	#N/A	0.270675	TRIDC4BG033850.6	fatty acid desaturase 8
	IWB74037	Tdurum_contig98255_84	4B	434028771	4B	435499955	54.7	0.277142	TRIDC4BG035740.5	Thioredoxin-like protein AAED1
	IWB73466	Tdurum_contig8028_870	4B	591781275	4B	590205953	77.8	0.283913	TRIDC4BG051230.1	Ethylene-responsive transcription factor 1	PH
	IWB7783	BS00030571_51	4B	608570388	4B	606290375	80.6	0.311639	TRIDC4BG053020.1	undescribed protein
	IWB9178	BS00064041_51	4B	609287129	4B	606999906	81.5	0.561842	TRIDC4BG053040.1	unknown function
	IWB55667	RAC875_c24515_602	4B	649525478	4B	649759775	98.9	0.267475	TRIDC4BG059190.5	cyclin-dependent kinase B2;2	PDS Phytoene desaturase (Kukri_c20125_281 83.1 cM)
	IWB33333	GENE-3324_338	5A	3752135	5A	3778873	2	0.275457	TRIDC5AG000870.3	Obtusifoliol 14-alpha demethylase
	IWA4765	wsnp_Ex_c807_1585614	5A	18590613	5A	19874811	26.2	0.529425	TRIDC5AG003470.3	Disease resistance protein
	IWB9533	BS00065386_51	5A	238594090	5A	436143495	84.2	0.329383	TRIDC5AG019010.2	undescribed protein
	#N/A	BobWhite_c13238_386	5A	242221719	5A	440854710	90.3	0.335632	TRIDC5AG019920.7	unknown function
	IWB53637	RAC875_c13_1458	5A	411256193	Un	94721369	57.3	0.300158	TRIDC5AG032990.12	FAR1-related sequence 10
	IWB6853	BS00022003_51	5A	442683373	5A	405620301	67	0.360189	TRIDC5AG036430.2	Vacuolar-processing enzyme
	IWB1581	BobWhite_c2236_111	5A	443085239	5A	405169340	#N/A	0.271666	TRIDC5AG036580.5	undescribed protein
	IWB12396	BS00109052_51	5A	443090369	5A	405164063	68.2	0.323574	TRIDC5AG036600.5	NAD(P)H-quinone oxidoreductase subunit L
	IWB59420	RAC875_c58966_471	5A	448075454	5A	411134820	72.7	0.273761	TRIDC5AG037050.8	microtubule-associated protein 65-7
	IWB10054	BS00067453_51	5A	448355871	5A	411415901	70.8	0.423211	TRIDC5AG037070.16	unknown function
	IWA2926	wsnp_Ex_c2474_4619730	5A	455777398	5A	419729469	73.6	0.2891	TRIDC5AG038180.11	Pentatricopeptide repeat-containing protein
	IWB71455	Tdurum_contig43874_1129	5A	458658752	5A	422686737	77.5	0.321035	TRIDC5AG038590.3	Protein kinase superfamily protein
	IWB46440	Kukri_c5460_1063	5A	462553836	5A	427404190	#N/A	0.334411	TRIDC5AG039050.6	Ribosomal RNA small subunit methyltransferase F
	IWB35904	IACX3154	5A	465085014	5A	429876474	84.7	0.36259	TRIDC5AG039270.2	Phosphatidylinositol 4-kinase gamma 7
	IWB34380	IAAV1417	5A	467685526	5A	432480295	84.2	0.526314	TRIDC5AG039530.3	D6 protein kinase like 2
	IWB61293	RAC875_c99519_227	5A	484856061	5A	453207763	96.6	0.617984	TRIDC5AG042230.10	Transport inhibitor response 1-like protein
	IWA6573	wsnp_Ku_c15816_24541162	5A	497920018	5A	465822067	101.9	0.366361	TRIDC5AG043910.12	ADP-ribosylation factor GTPase-activating protein 3
	IWB52493	Ra_c700_2210	5A	498153826	5A	466080433	102.2	0.348544	TRIDC5AG043950.2	Disease resistance protein
	IWB28392	Excalibur_c6567_845	5A	500095911	5A	467779851	#N/A	0.335632	TRIDC5AG044300.1	undescribed protein
	IWB56233	RAC875_c28819_281	5A	500429102	5A	468101260	104.9	0.736065	TRIDC5AG044390.4	Ankyrin repeat domain-containing protein 2A
	IWB52919	RAC875_c101391_521	5A	520991666	5A	488243409	111.5	0.339912	TRIDC5AG046690.1	NC domain-containing protein-related
	IWA7135	wsnp_Ku_c51039_56457361	5A	523750149	5A	491036034	111.3	0.662692	TRIDC5AG046940.15	kinesin-like protein 1	VRN-A1 gwm639 (111.5 cM)
	IWB68679	Tdurum_contig17712_115	5A	531647117	5A	498793979	113.2	0.365803	TRIDC5AG048030.8	unknown function
	IWB41287	Kukri_c14889_1086	5A	535829928	5A	503012460	114.9	0.424182	TRIDC5AG048810.3	protein kinase family protein
	IWB10594	BS00072156_51	5A	536408676	5A	503595717	115.5	0.613782	TRIDC5AG049000.4	winged-helix DNA-binding transcription factor family protein	TKW -PC-TKW-GY-PH
	IWB66909	Tdurum_contig11060_433	5A	539881645	5A	507220834		0.663598	TRIDC5AG049250.5	LRR receptor-like serine/threonine-protein kinase FLS2
	IWB54773	RAC875_c19099_434	5A	541183370	5A	508527712		0.530715	TRIDC5AG049510.4	phospholipase D P2	PSY3 Phytoene synthase 3 (BS00077855_51 126.8 cM)
	IWB46400	Kukri_c54078_114	5A	560338075	5B	542502820		0.341562	TRIDC5AG053340.5	Molybdenum cofactor sulfurase family protein	PSY3 Phytoene synthase 3 (BS00077855_51 126.8 cM)
	IWB47196	Kukri_c6492_375	5A	563243390	5A	529834823	134.5	0.341696	TRIDC5AG053790.3	UDP-3-O-acylglucosamine N-acyltransferase
	IWB34355	IAAV1311	5A	565011396	5A	531701513	135.2	0.363366	TRIDC5AG054150.7	Plasma-membrane choline transporter family protein	FR-A1 gene (Frost tolerance gwm 1570 134.5 cM) //
	IWB34418	IAAV1650	5A	579766592	5A	546429369	142.5	0.317835	TRIDC5AG056610.8	Cytosolic Fe-S cluster assembly factor NAR1 homolog
	IWB56489	RAC875_c30566_230	5A	580158773	5A	546754316	142.8	0.51219	TRIDC5AG056680.10	Beta-glucosidase C
	IWB23955	Excalibur_c23354_306	5A	583630864	5A	548462218	144.8	0.251108	TRIDC5AG057050.1	Chaperone DnaJ-domain superfamily protein
	IWA454	wsnp_BF293620A_Ta_2_1	5A	583808886	5B	571897123	144.8	0.286468	TRIDC5AG057120.6	Cleavage stimulation factor subunit 50
	IWA4449	wsnp_Ex_c621_1231444	5A	586389873	5A	552863315	146.5	0.345301	TRIDC5AG057670.9	unknown function
	IWB8258	BS00041063_51	5A	590110597	5A	556583673	146.5	0.395929	TRIDC5AG058430.7	unknown function
	IWB37063	JD_c15758_288	5A	590512536	5A	557031715	147.4	0.311959	TRIDC5AG058530.4	Transmembrane protein 147
	IWB27060	Excalibur_c49550_97	5A	592815919	5A	559337416	149.7	0.502624	TRIDC5AG059000.2	eukaryotic translation initiation factor 3 subunit C2
	IWB6903	BS00022098_51	5A	604551549	5B	598184563	156.5	0.47737	TRIDC5AG061240.18	Splicing factor U2AF 23 kDa subunit
	IWA675	wsnp_CAP11_c1506_840951	5A	605216123	5A	571369803	156.5	0.590147	TRIDC5AG061350.10	L-lactate dehydrogenase
	IWB46500	Kukri_c55310_94	5A	625748708	5B	632327668	152.1	0.330846	TRIDC5AG064880.11	Histidine kinase-, DNA gyrase B-, and HSP90-like ATPase family protein
	IWB5368	BobWhite_rep_c63332_67	5A	670506048	5A	637534469	184.4	0.395351	TRIDC5AG073280.2	Protein kinase superfamily protein
	IWB4836	BobWhite_rep_c50013_65	5A	672856982	5A	639774511	195.1	0.320585	TRIDC5AG073690.3	dihydroflavonol 4-reductase-like1	PH-KNS
	IWB5178	BobWhite_rep_c57286_122	5A	672856992	5A	639774521	195.1	0.321389	TRIDC5AG073690.3	dihydroflavonol 4-reductase-like1	Rht-12 wmc410 193.3 cM
	IWB72378	Tdurum_contig54689_646	5A	677049849	5A	644116786	199.6	0.37895	TRIDC5AG074320.1	Riboflavin biosynthesis protein RibD
	IWA3335	wsnp_Ex_c3136_5798236	5A	677672340	5A	644740195	199.6	0.344612	TRIDC5AG074380.6	26S proteasome non-ATPase regulatory subunit 11 homolog
	IWB6716	BS00021688_51	5A	689581673	5A	657083954	208.8	0.754936	TRIDC5AG076650.3	unknown function
	IWA408	wsnp_BE638137B_Ta_2_2	5A	693410688	4B	667710949	117.6	0.295566	TRIDC5AG077520.5	ATP-dependent RNA helicase DeaD	VRN-A2 gwm 291 (205.5 cM)
	IWB20135	Ex_c2171_2600	5A	698098638	5A	667285304	217	0.38627	TRIDC5AG078470.8	Zinc finger CCCH domain-containing protein 19
	IWA2646	wsnp_Ex_c2171_4074003	5A	698099794	5A	667286410	217	0.261178	TRIDC5AG078490.5	Transmembrane and coiled-coil domain-containing protein 4
	IWB26869	Excalibur_c47452_183	5B	5421681	5B	5169708	2	0.363845	TRIDC5BG000910.3	Ubiquitin-conjugating enzyme family protein
	IWB68150	Tdurum_contig14130_315	5B	9409980	5B	9790752	6.5	0.335517	TRIDC5BG001850.28	ERD (early-responsive to dehydration stress) family protein
	IWA5176	wsnp_Ex_rep_c110196_92676847	5B	16184139	Un	121546845	13.5	0.374917	TRIDC5BG002720.4	Anaphase-promoting complex subunit 5
	IWA332	wsnp_BE499835B_Ta_2_5	5B	19568504	5B	20749661	16.7	0.340102	TRIDC5BG003290.7	N-carbamoylputrescine amidase	PSY2 Phytoene synthase 2 (Excalibur_c3948_1315 15.8 cM)
	IWB14983	CAP8_c909_312	5B	25032726	4B	11422008	22.4	0.284644	TRIDC5BG004290.3	40S ribosomal protein S20	PSY2 Phytoene synthase 2 (Excalibur_c3948_1315 15.8 cM)
	IWB20311	Ex_c2571_987	5B	56661738	5B	56438398	37.2	0.435433	TRIDC5BG008430.3	Importin subunit beta-1
	IWB2816	BobWhite_c36054_53	5B	287121003	5B	278123024	42.7	0.329919	TRIDC5BG026590.1	unknown function
	IWA5773	wsnp_JD_c10416_11077664	5B	337112482	5B	325992685	#N/A	0.256377	TRIDC5BG031060.5	Ethylene-responsive transcription factor 8
	IWA4300	wsnp_Ex_c5632_9904112	5B	369736384	5B	355299254	44	0.42549	TRIDC5BG033870.31	unknown function
	IWB65408	TA001494-0485	5B	375800440	5B	361463311		0.381946	TRIDC5BG034390.1	ELF4-like 3
	IWB65663	TA003225-1427	5B	383651583	5B	369135680		0.296526	TRIDC5BG034910.6	UBX domain-containing protein 6
	IWB7194	BS00022652_51	5B	392107905	5B	377861236	#N/A	0.387392	TRIDC5BG035830.4	Cytochrome P450 superfamily protein
	IWB56335	RAC875_c29431_1849	5B	405924266	5B	394272251	50.2	0.401242	TRIDC5BG037470.1	Pentatricopeptide repeat-containing protein
	IWB36666	Jagger_c5915_58	5B	436190684	5B	424995206	#N/A	0.345078	TRIDC5BG040980.2	RING/U-box superfamily protein
	IWB7678	BS00028183_51	5B	439666573	5B	428793751	#N/A	0.676891	TRIDC5BG041540.3	undescribed protein
	IWB35729	IACX12578	5B	440779576	5B	429886540		0.36259	TRIDC5BG041610.6	BHLH transcription factor
	IWB33393	GENE-3440_199	5B	452708610	5B	442632576		0.348283	TRIDC5BG043290.3	undescribed protein
	IWB44988	Kukri_c40046_237	5B	466916075	5B	459072012	#N/A	0.274937	TRIDC5BG045370.6	undescribed protein
	IWB7361	BS00022993_51	5B	466918314	5B	459074250	#N/A	0.252466	TRIDC5BG045390.3	30S ribosomal protein S16
	IWA4957	wsnp_Ex_c974_1864971	5B	478918787	5B	474885816	72.9	0.539246	TRIDC5BG046990.10	unknown function
	IWA5048	wsnp_Ex_rep_c102070_87317290	5B	482374376	5B	478323641	74.8	0.276173	TRIDC5BG047680.7	hydroxyproline-rich glycoprotein family protein
	IWB13600	CAP12_rep_c4520_207	5B	493569782	5B	487744891	78	0.255981	TRIDC5BG049060.2	undescribed protein
	IWB52612	Ra_c73292_443	5B	518614378	5B	511520054	91.2	0.555294	TRIDC5BG052530.7	Topoisomerase II-associated protein PAT1
	IWB68661	Tdurum_contig17500_876	5B	521101818	5B	513955558	92.2	0.44704	TRIDC5BG052830.4	SKP1-like 4
	IWB57100	RAC875_c35715_718	5B	523905866	5B	516515023	93.3	0.424642	TRIDC5BG053240.8	Chromatin assembly factor 1 subunit A
	IWB54772	RAC875_c19099_308	5B	524561737	5B	516986181	93.9	0.532314	TRIDC5BG053330.4	phospholipase D P2
	IWB8298	BS00042014_51	5B	525925096	5B	518378088	94.5	0.419099	TRIDC5BG053420.1	undescribed protein
	IWB13747	CAP7_c1155_57	5B	526258342	5B	518704500	94.5	0.258404	TRIDC5BG053430.26	Protein kinase superfamily protein
	IWB35312	IAAV7226	5B	548831794	5B	540048670	106.2	0.545292	TRIDC5BG057040.1	Cytochrome P450 superfamily protein
	IWA6895	wsnp_Ku_c3102_5811860	5B	551313730	5B	542499464	107.6	0.474785	TRIDC5BG057320.7	zinc finger (C2H2 type) family protein
	IWB27651	Excalibur_c56310_57	5B	555989533	5B	547230928	112.5	0.333728	TRIDC5BG058020.24	Protein kinase superfamily protein
	IWB66355	Tdurum_contig10210_425	5B	556522599	5A	531759920		0.390126	TRIDC5BG058140.13	RHOMBOID-like protein 15
	IWB7745	BS00029869_51	5B	560193805	5B	551310600	114.5	0.28978	TRIDC5BG058630.15	DNA-directed RNA polymerase family protein
	IWA7735	wsnp_Ra_c2105_4092507	5B	560996162	5B	552220003	114.9	0.286337	TRIDC5BG058750.1	undescribed protein
	IWB67811	Tdurum_contig12995_792	5B	565634721	5B	557012259	115.4	0.251649	TRIDC5BG059320.2	Single-stranded DNA-binding protein
	IWB50957	Ra_c11667_324	5B	572100271	5B	562801497	119.3	0.386379	TRIDC5BG059900.14	polyubiquitin 10
	IWB7206	BS00022673_51	5B	590095893	5B	580878439	129.7	0.353543	TRIDC5BG062890.2	N-terminal protein myristoylation
	IWB8292	BS00041911_51	5B	607447453	5B	598174984	140	0.525859	TRIDC5BG065330.5	40S ribosomal protein S12
	IWB35422	IAAV8042	5B	614555241	5B	605196600		0.431585	TRIDC5BG066550.12	Type IV inositol polyphosphate 5-phosphatase 7	GDH-5B Glutamate dehydrogenase (RAC875_c91566_56 143 cM)
	IWB12545	BS00110474_51	5B	619452486	5B	610263507	145.2	0.288692	TRIDC5BG067300.4	Bax inhibitor-1 family protein	GDH-5B Glutamate dehydrogenase (RAC875_c91566_56 143 cM)
	IWB8541	BS00049548_51	5B	628582623	5B	619418435	#N/A	0.295525	TRIDC5BG068430.4	undescribed protein
	IWB58404	RAC875_c48052_127	5B	638418331	5B	632328264	152.1	0.331081	TRIDC5BG069810.3	Histidine kinase-, DNA gyrase B-, and HSP90-like ATPase family protein
	IWA6406	wsnp_Ku_c1075_2160065	5B	647505635	6A	561478432		0.281838	TRIDC5BG071310.2	Protein FAR1-RELATED SEQUENCE 3	VRN-B1 5B 151 cM
	#N/A	BobWhite_c11038_605	5B	654147947	5B	646590215	158.3	0.576463	TRIDC5BG072310.7	40S ribosomal protein S26
	IWB6771	BS00021868_51	5B	655968469	5B	648246336	160.3	0.574585	TRIDC5BG072740.6	SCAR-like protein 1	ABA2 (SDR) Short-chain alcohol dehydrogenase (RFL_Contig4520_749 157.5 cM)
	IWB45083	Kukri_c4096_220	5B	660107828	5B	652010743	163.4	0.334777	TRIDC5BG073570.2	Disease resistance protein RPP13
	IWB1968	BobWhite_c26082_239	5B	687467478	5B	676033120	182.5	0.29569	TRIDC5BG078250.1	undescribed protein
	IWB11983	BS00097030_51	5B	695485915	5B	684349754	190.9	0.346645	TRIDC5BG080200.5	RPM1 interacting protein 4
	IWB7581	BS00025560_51	6A	8521181	6A	7419102	4.3	0.398471	TRIDC6AG002320.5	RNA-binding protein 48
	IWB69896	Tdurum_contig29823_203	6A	10589921	6A	10247848	5.7	0.291013	TRIDC6AG002820.1	undescribed protein
	IWB41245	Kukri_c14679_1082	6A	12387071	6A	12639100	9.3	0.254603	TRIDC6AG003400.13	CHD3-type chromatin-remodeling factor PICKLE
	IWB7337	BS00022951_51	6A	16454526	6A	16753143	12.8	0.400156	TRIDC6AG004520.1	RNA-binding protein NOB1	NRT2-6A Nitrate transporter BS00066615_51 (11.2 cM)
	IWA1589	wsnp_Ex_c12141_19415226	6A	60303722	6A	59782922	41	0.272278	TRIDC6AG011870.6	anthranilate phosphoribosyltransferase, putative
	IWB74998	tplb0052b07_577	6A	61188013	6A	60641171	40.9	0.352348	TRIDC6AG012190.6	Uncharacterised conserved protein (UCP030365)	Rht18
	IWB63387	RAC875_rep_c99895_112	6A	66594004	6A	66195178		0.315272	TRIDC6AG012980.15	unknown function	Rht18
	IWA5466	wsnp_Ex_rep_c67878_66584488	6A	84621833	6A	84125582	#N/A	0.317713	TRIDC6AG015290.5	Splicing factor 3B subunit 1	Rht18
	IWB74347	tplb0028p11_1104	6A	90612851	6A	90198499	46.9	0.33052	TRIDC6AG015880.6	Protein phosphatase 2C family protein	Rht18
	IWB72415	Tdurum_contig54967_581	6A	92488213	6B	146355900		0.304934	TRIDC6AG016070.2	Kelch repeat-containing F-box family protein
	IWB33567	GENE-3709_393	6A	498818348	6A	493823535	62.6	0.292809	TRIDC6AG041560.14	Protein kinase superfamily protein
	IWA5074	wsnp_Ex_rep_c102807_87894833	6A	548164371	6A	542710932	71.8	0.364817	TRIDC6AG046950.4	unknown function	NCED4 (CCD4) 9-cis-epoxycarotenoid dioxigenase 4 wsnp_RFL_Contig4424_5193532 62.8 cM
	IWB13180	CAP12_c118_95	6A	555033124	6A	549680726	75.2	0.426385	TRIDC6AG048030.4	light-harvesting chlorophyll B-binding protein 3
	IWB24701	Excalibur_c2834_397	6A	555165997	6A	549816278	75.2	0.489762	TRIDC6AG048060.8	RNA polymerase-associated protein CTR9 homolog
	IWB35085	IAAV5761	6A	567860128	6A	562739041	86.3	0.281838	TRIDC6AG050080.7	Nuclear transcription factor Y subunit A-5
	IWA3585	wsnp_Ex_c36801_44683992	6A	568987066	6A	563920498	86.3	0.334997	TRIDC6AG050260.8	DENN domain-containing protein 5B
	IWA20	wsnp_BE403154A_Ta_2_9	6A	582388314	6A	576692774	93.4	0.279695	TRIDC6AG052510.8	E3 ubiquitin-protein ligase BRE1A
	IWB5984	BS00004466_51	6A	599254968	6A	594452165	115.4	0.324496	TRIDC6AG056260.2	Methionine import ATP-binding protein MetN
	IWA4602	wsnp_Ex_c7002_12063325	6A	601542827	6A	597277839	117.7	0.41228	TRIDC6AG056880.4	Bidirectional sugar transporter N3
	IWB35245	IAAV6777	6A	605625633	6A	600476584	122.4	0.357024	TRIDC6AG057890.18	unknown function
	IWB10025	BS00067339_51	6A	608330439	1A	44165819	#N/A	0.315442	TRIDC6AG058390.1	undescribed protein	CYP97A3 (LUT5) Carotenoid β-ring hydroxylase (Cytochrome P450-type monooxygenase CYP97A3) 122 cM
	IWB31394	Excalibur_rep_c90454_251	6A	609064443	6A	603564900	124.8	0.354987	TRIDC6AG058560.5	Tetratricopeptide repeat (TPR)-like superfamily protein
	IWB31024	Excalibur_rep_c69054_795	6A	609801901	6A	603985573	124.8	0.271803	TRIDC6AG058810.19	Aconitate hydratase 1
	IWA1510	wsnp_Ex_c1153_2213588	6A	611914261	6A	606399453	127.1	0.391766	TRIDC6AG059490.6	RING/U-box superfamily protein
	IWA5768	wsnp_Ex_rep_c98716_85135069	6A	612479337	6A	606954670	126.5	0.360413	TRIDC6AG059650.4	NAC domain containing protein 2
	IWB9295	BS00064478_51	6A	615212821	6B	688744513		0.392577	TRIDC6AG060150.4	Disease resistance protein
	IWB2096	BobWhite_c27364_124	6A	615349261	6B	689149063		0.63874	TRIDC6AG060240.4	Putative integral membrane protein conserved region (DUF2404)
	IWB67689	Tdurum_contig12648_389	6A	617067659	6A	611066170		0.484426	TRIDC6AG060730.4	Calcium-dependent lipid-binding (CaLB domain) family protein
	IWB6503	BS00011962_51	6A	617887217	6A	612634272	#N/A	0.420464	TRIDC6AG061080.4	Mitochondrial intermediate peptidase
	IWB6395	BS00011404_51	6A	618339267	6A	613055191	#N/A	0.26742	TRIDC6AG061230.3	unknown function
	IWB60698	RAC875_c8254_249	6A	620593504	6A	614536653	131.2	0.398055	TRIDC6AG061730.24	callose synthase 1
	IWB34432	IAAV1711	6B	31588045	6B	28674710	31.3	0.326371	TRIDC6BG006400.4	RNA-binding protein NOB1
	IWB40519	Kukri_c11106_439	6B	39006935	6B	37361880		0.451454	TRIDC6BG007760.7	BHLH transcription factor
	IWA2375	wsnp_Ex_c19082_27999258	6B	61477137	6B	58139169	45.2	0.300913	TRIDC6BG011340.9	serine/threonine protein kinase 2
	IWA3501	wsnp_Ex_c34962_43193869	6B	143325173	6B	137096135	61.3	0.353699	TRIDC6BG020420.9	Nuclear pore complex protein NUP160
	IWB44910	Kukri_c39321_112	6B	155687581	6B	146356223	65.1	0.316762	TRIDC6BG021800.3	Kelch repeat-containing F-box family protein
	IWA3676	wsnp_Ex_c39304_46634878	6B	158360004	6B	148510247	#N/A	0.453424	TRIDC6BG022050.4	Protein VERNALIZATION INSENSITIVE 3
	IWB26897	Excalibur_c47748_83	6B	160726391	6B	151143150	66.5	0.281277	TRIDC6BG022360.8	Fatty acid oxidation complex subunit alpha
	IWA5267	wsnp_Ex_rep_c66552_64838102	6B	163154095	6B	152408580	67.1	0.323049	TRIDC6BG022880.11	unknown function
	IWA8011	wsnp_Ra_c57648_59682822	6B	185854784	6B	174846977	69.9	0.34353	TRIDC6BG025290.7	B3 domain-containing protein
	IWB36646	Jagger_c555_287	6B	196810876	6B	185909706	#N/A	0.465456	TRIDC6BG026320.4	Nucleoid-associated protein YbaB
	IWB7574	BS00025302_51	6B	204872079	6B	193948533	70.9	0.663756	TRIDC6BG026840.20	Ribulokinase 2
	IWB55300	RAC875_c22101_656	6B	207918264	6B	196991162	71.2	0.267262	TRIDC6BG027200.13	Receptor-like protein kinase 5
	IWB1088	BobWhite_c17750_568	6B	212072767	6B	201058942	71.2	0.499427	TRIDC6BG027580.2	undescribed protein
	IWB10850	BS00076093_51	6B	224409518	6B	220676018	71.9	0.501909	TRIDC6BG028700.4	undescribed protein
	IWB70802	Tdurum_contig42087_1941	6B	232817932	6B	229940270	71.6	0.654134	TRIDC6BG029540.3	undescribed protein
	IWA1545	wsnp_Ex_c11873_19047792	6B	234003828	6B	231128639	71.9	0.622132	TRIDC6BG029590.11	methyl-CPG-binding domain 9
	IWB9873	BS00066719_51	6B	240773764	6B	235412730		0.364792	TRIDC6BG030080.1	undescribed protein
	IWB8576	BS00049942_51	6B	437800328	6B	432620790	74.9	0.334429	TRIDC6BG041330.1	undescribed protein
	IWB8644	BS00054287_51	6B	444680503	6B	439389089	76.3	0.307011	TRIDC6BG041940.2	Protein kinase superfamily protein
	IWB71780	Tdurum_contig47269_904	6B	577575174	6B	569781287	93	0.297466	TRIDC6BG054050.1	Photosynthetic NDH subcomplex B 4
	IWB47270	Kukri_c65887_282	6B	600379366	6B	589839563	#N/A	0.420244	TRIDC6BG055760.1	Lysine-specific histone demethylase 1 homolog 1
	IWB50266	Kukri_rep_c73457_419	6B	601571515	6A	549414950		0.400669	TRIDC6BG055930.7	DIS3-like exonuclease 2
	IWB73319	Tdurum_contig75814_655	6B	628204141	6A	566474508		0.410039	TRIDC6BG059220.3	MTD1	NIR-6B Nitrite Reductase CAP7_c7415_267 (102 cM)
	IWB71722	Tdurum_contig46808_4106	6B	652221813	6B	644758369	114.3	0.405827	TRIDC6BG062800.5	Protein kinase superfamily protein	NIR-6B Nitrite Reductase CAP7_c7415_267 (102 cM)
	IWB19986	Ex_c17379_1431	6B	674252389	6B	668704345	134.3	0.37802	TRIDC6BG066500.8	Transcriptional corepressor LEUNIG
	IWB60699	RAC875_c8254_594	6B	685454988	6B	695093664	155.1	0.477406	TRIDC6BG068360.47	callose synthase 1
	IWB46894	Kukri_c60966_261	6B	686953716	6B	693337572	155.1	0.314617	TRIDC6BG068790.3	unknown function
	IWB23484	Excalibur_c20459_1081	6B	689916225	6B	682079181		0.324885	TRIDC6BG069580.18	Aconitate hydratase 1
	IWB64579	RFL_Contig4069_2628	6B	690846747	6B	682768143		0.280852	TRIDC6BG069890.2	hydroxyproline-rich glycoprotein family protein
	IWB74836	tplb0045l08_298	6B	693161028	6B	684858853	#N/A	0.432201	TRIDC6BG070540.5	Aquaporin-like superfamily protein
	IWB62149	RAC875_rep_c112449_669	6B	694348520	6B	685986969		0.26573	TRIDC6BG070670.4	NAC domain protein,
	IWB55490	RAC875_c23338_792	6B	696667575	6B	691982200	#N/A	0.437197	TRIDC6BG071280.1	unknown function
	IWB53601	RAC875_c12821_466	6B	697367656	6B	692527805	#N/A	0.287546	TRIDC6BG071550.2	undescribed protein
	IWB66700	Tdurum_contig10729_989	6B	697985375	6B	690593419	155.1	0.544983	TRIDC6BG071680.25	RING/U-box superfamily protein
	IWB45581	Kukri_c45876_157	6B	698233100	6B	690840276	155.1	0.452589	TRIDC6BG071780.3	unknown function
	IWB66027	TA005876-0602	6B	698233239	6B	690840509	155.9	0.589228	TRIDC6BG071780.3	unknown function
	IWB11740	BS00091909_51	6B	702864740	6B	688490519	#N/A	0.376487	TRIDC6BG073500.2	Splicing factor 3B subunit 2
	IWB74964	tplb0050d17_1401	6B	703064038	6B	688254447	151	0.601936	TRIDC6BG073520.23	Sucrose transport protein
	IWB23864	Excalibur_c22830_1989	7A	3287580	7A	2770202	171	0.399085	TRIDC7AG000880.11	Transducin/WD40 repeat-like superfamily protein
	IWB55835	RAC875_c25710_297	7A	6082723	6B	296405142	#N/A	0.259722	TRIDC7AG002070.1	Disease resistance protein RPP13
	IWB55317	RAC875_c22233_83	7A	7793891	7A	9267059	7	0.342034	TRIDC7AG002560.8	Disease resistance protein
	IWB34029	GENE-4592_541	7A	9396346	7A	10878563		0.312225	TRIDC7AG002890.10	S-adenosyl-L-methionine-dependent methyltransferases superfamily protein
	IWB42011	Kukri_c18677_823	7A	9397819	7A	10880009	#N/A	0.328393	TRIDC7AG002890.11	S-adenosyl-L-methionine-dependent methyltransferases superfamily protein
	#N/A	BobWhite_c14495_230	7A	10643906	7A	11988091		0.284858	TRIDC7AG003110.1	cellulose-synthase like D2
	IWB11249	BS00082268_51	7A	12422453	7A	13891374	9.8	0.419894	TRIDC7AG003440.1	Avenin-like b4
	IWB62597	RAC875_rep_c69632_65	7A	14604642	4A	709267550		0.366163	TRIDC7AG004050.16	sucrose synthase 4
	IWB71783	Tdurum_contig47309_600	7A	18151984	7A	20901291	14.1	0.336207	TRIDC7AG005070.18	Protein kinase superfamily protein
	IWB59812	RAC875_c63822_185	7A	20575399	7A	23746251	17.8	0.426385	TRIDC7AG005690.9	Essential protein Yae1, N-terminal	18154348 - TRIDC7AG005090.1 - Growth-regulating factor 5
	IWB73571	Tdurum_contig82438_73	7A	47690261	7A	52385603	55.9	0.417841	TRIDC7AG010380.3	Cadmium tolerant 1
	IWB67816	Tdurum_contig13011_241	7A	53370791	7A	58452672	58.7	0.297881	TRIDC7AG011470.2	undescribed protein
	IWB72200	Tdurum_contig51645_738	7A	62289789	7A	66088136	62.5	0.36455	TRIDC7AG013010.4	unknown function
	IWB34089	GENE-4660_123	7A	63037506	7A	66753158	#N/A	0.367824	TRIDC7AG013100.5	Protein SIP5
	IWB60067	RAC875_c67063_703	7A	109617182	7A	108866724	89.6	0.456776	TRIDC7AG019400.4	Ethylene-responsive transcription factor 1
	IWB63084	RAC875_rep_c76772_850	7A	114087236	7A	113472467	90.2	0.326055	TRIDC7AG019880.9	auxin response factor 19	HD-PH
	IWB35972	IACX481	7A	114510717	7A	113937919	90.9	0.297058	TRIDC7AG019920.8	10 kDa chaperonin
	IWB23091	Excalibur_c18182_464	7A	478920547	6B	195588125		0.324659	TRIDC7AG046290.1	undescribed protein
	IWB47294	Kukri_c66328_222	7A	542077571	7A	540895907	#N/A	0.291468	TRIDC7AG051790.8	50S ribosomal protein L19
	IWA3701	wsnp_Ex_c40011_47158369	7A	574639659	7A	573639375	#N/A	0.281106	TRIDC7AG055400.6	Brefeldin A-inhibited guanine nucleotide-exchange protein 1
	IWB23497	Excalibur_c20486_268	7A	617784289	4A	596199826	138.7	0.375244	TRIDC7AG059660.2	undescribed protein
	IWB23685	Excalibur_c21739_688	7A	658963276	7B	616297909		0.261491	TRIDC7AG065170.9	tubulin beta chain 2
	IWA1031	wsnp_CAP7_c1321_664478	7A	671454407	7A	669297485	167.2	0.555957	TRIDC7AG067670.3	Peptidyl-prolyl cis-trans isomerase	TKW-grain A / survival A	Guo et al. 2017
	IWB36250	IACX7848	7A	673189965	7A	671018515	167.4	0.415835	TRIDC7AG067840.1	unknown function
	IWB9574	BS00065529_51	7A	685563034	7A	683508050	172.9	0.574539	TRIDC7AG069760.1	Histone H2B.6
	IWB6292	BS00010809_51	7A	687602318	7A	684997844	176	0.27563	TRIDC7AG070320.3	unknown function
	IWB58285	RAC875_c4682_646	7A	695922016	7A	694718001		0.313457	TRIDC7AG072330.4	Factor of DNA methylation 1
	IWB26780	Excalibur_c46453_144	7A	712275506	7A	711843310	193.9	0.298904	TRIDC7AG075700.7	Protein of unknown function (DUF616)
	IWB38489	Ku_c15539_433	7A	716336705	7B	707926635		0.262695	TRIDC7AG076360.12	catalase 2
	IWB36088	IACX5996	7A	722310486	7A	721403394	203.4	0.324111	TRIDC7AG077360.11	Disease resistance protein (CC-NBS-LRR class) family	HD
	IWB3312	BobWhite_c43557_103	7A	722925739	7B	716678020		0.428428	TRIDC7AG077550.17	DNA-directed RNA polymerases I, II, and III subunit RPABC4	PSY1 Phytoene synthase 1 (BS00022137_51 203.2 cM)
	IWB57016	RAC875_c34939_963	7A	722926230	7B	716677417		0.532438	TRIDC7AG077550.17	DNA-directed RNA polymerases I, II, and III subunit RPABC4
	IWB75238	tplb0060b03_432	7A	723573014	7B	717786300		0.542477	TRIDC7AG077660.7	Ycf48-like protein
	IWB1884	BobWhite_c25163_178	7B	6512086	7B	485640466		0.438314	TRIDC7BG001120.2	undescribed protein
	IWB13248	CAP12_c1816_325	7B	25936996	7B	22091813	19.4	0.434401	TRIDC7BG003590.3	Late embryogenesis abundant protein, group 2
	IWA2568	wsnp_Ex_c2103_3947695	7B	28880504	7B	24663257	20.7	0.255888	TRIDC7BG004030.15	E3 SUMO-protein ligase pli1
	IWA1315	wsnp_Ex_c10342_16938528	7B	45042249	7B	41716041	28.5	0.314695	TRIDC7BG006230.8	2-oxoglutarate (2OG) and Fe(II)-dependent oxygenase superfamily protein
	IWB41262	Kukri_c14766_484	7B	66319385	7B	617849760	128.9	0.627592	TRIDC7BG008680.1	unknown function
	IWB65522	TA002254-0660	7B	67954515	7B	698961189		0.429265	TRIDC7BG009000.3	Beta-1,3-N-Acetylglucosaminyltransferase family protein
	IWB33912	GENE-4338_512	7B	79035605	7B	75078449		0.254169	TRIDC7BG010400.8	Receptor-like protein kinase 5
	IWB34748	IAAV3646	7B	149895084	7B	143485686	63.6	0.343886	TRIDC7BG018110.7	D6 protein kinase like 2
	IWB61270	RAC875_c99084_580	7B	188545308	7B	181982206	67.1	0.27959	TRIDC7BG021810.3	Protein of unknown function (DUF1666)
	IWB59598	RAC875_c61456_317	7B	283994697	5B	292479887		0.490422	TRIDC7BG028950.7	Plant protein of unknown function (DUF247)
	IWB43965	Kukri_c31305_75	7B	433246568	7B	410570933	76.1	0.271128	TRIDC7BG037580.4	RING/U-box superfamily protein
	IWB11767	BS00092630_51	7B	576544781	7B	543768362	104.5	0.366152	TRIDC7BG051050.13	UDP-sugar pyrophosphorylase
	IWB46260	Kukri_c52496_434	7B	618981137	7B	594529788	120.4	0.391383	TRIDC7BG056250.18	DNA polymerase alpha subunit B
	IWB1711	BobWhite_c23455_184	7B	633131781	7B	608619194	#N/A	0.331247	TRIDC7BG057880.8	geranyl diphosphate synthase 1
	IWB46046	Kukri_c50071_1084	7B	640050867	7A	656882124	127.4	0.2589	TRIDC7BG058660.7	tubulin beta chain 2
	IWB55190	RAC875_c21489_908	7B	643349812	7B	618427783	128.9	0.627592	TRIDC7BG058990.10	undescribed protein
	IWB35974	IACX486	7B	643765799	7B	618037975	129.4	0.373972	TRIDC7BG059050.5	Glutathione S-transferase
	IWB68100	Tdurum_contig13930_254	7B	651145414	7B	628088216	132.8	0.278313	TRIDC7BG060220.1	Leucine-rich receptor-like protein kinase family protein
	IWB60960	RAC875_c89312_61	7B	686665181	7B	662415297	150.8	0.382469	TRIDC7BG064850.2	GDP-L-fucose synthase 1
	IWB40344	Kukri_c10430_1138	7B	705652153	7B	680212061	164.4	0.291025	TRIDC7BG068220.7	receptor kinase 3
	IWB68678	Tdurum_contig17697_771	7B	705856657	7B	680417674	164.4	0.483963	TRIDC7BG068270.4	ENTH/ANTH/VHS superfamily protein
	IWB51641	Ra_c26852_560	7B	707704513	7B	682000288	167.4	0.377336	TRIDC7BG068730.6	WD repeat-containing protein 36
	IWA4803	wsnp_Ex_c8400_14157318	7B	708526547	7B	682651324	168.6	0.489768	TRIDC7BG068920.4	NF-X1-type zinc finger protein NFXL1
	IWB73054	Tdurum_contig67161_99	7B	710094217	7B	684298283	169.8	0.25248	TRIDC7BG069190.6	Transcriptional corepressor SEUSS
	IWB38836	Ku_c22990_969	7B	715910244	7B	688932905	175.9	0.368193	TRIDC7BG069960.3	Zinc finger CCCH domain-containing protein 7
	IWB3618	BobWhite_c478_1386	7B	722982283	6B	667812683		0.298701	TRIDC7BG071670.39	undescribed protein
	IWB71506	Tdurum_contig44206_1503	7B	734184801	7B	706922944	190.9	0.486539	TRIDC7BG073100.20	1,4-alpha-glucan branching enzyme GlgB
	IWB31089	Excalibur_rep_c69840_85	7B	735493895	7B	707926604	193.2	0.262695	TRIDC7BG073240.10	catalase 2
	IWB45356	Kukri_c4352_318	7B	737799370	7B	715531258	211.7	0.253421	TRIDC7BG073700.7	Chromodomain-helicase-DNA-binding protein 3	735495173 - TRIDC7BG073250.1 -Polyphenol oxidase A1, chloroplastic
	IWB73667	Tdurum_contig8448_363	7B	739054968	7B	714383277	200.1	0.253426	TRIDC7BG073840.12	Chloroplastic group IIA intron splicing facilitator CRS1, chloroplastic	PSY1-b1 Phytoene synthase 1 714361446bp Svevo
	IWB34230	GENE-4900_136	7B	743312582	Un	397954901	196.5	0.365875	TRIDC7BG074030.27	callose synthase 1
	IWB64414	RFL_Contig3607_648	7B	749218177	Un	153909734	202.9	0.428428	TRIDC7BG075860.8	Ycf48-like protein
LR vs OC
	IWB13355	CAP12_c3074_192	1A	4258494	1A	4902350	4.1	0.25286	TRIDC1AG000880.1	Protein of unknown function (DUF 3339)	Glu-A3/Pm3 (zavitan genome) 6226576Mb
	IWB35270	IAAV6919	1A	326169932	1A	318108456		0.250329	TRIDC1AG027430.6	unknown function
	IWB60861	RAC875_c86680_391	1A	467274229	1A	456807575	62.8	0.346003	TRIDC1AG040300.5	Subtilisin-like protease SBT3.17
	IWB35927	IACX3496	1A	473397696	1A	463441708	67.7	0.367554	TRIDC1AG041070.2	ferredoxin 3
	IWB43491	Kukri_c27785_400	1A	481780220	1A	471745295	70.5	0.290951	TRIDC1AG041940.11	Gamma-glutamyl phosphate reductase
	IWB57504	RAC875_c39312_339	1A	587692859	1A	579778835	162.3	0.291309	TRIDC1AG064300.12	Translation initiation factor IF-2
	IWA540	wsnp_BG274294B_Ta_2_3	1B	547898029	1B	535359528	74.7	0.326576	TRIDC1BG051760.2	Endoplasmic reticulum-Golgi intermediate compartment protein 3
	IWB69088	Tdurum_contig25457_175	1B	550517382	1B	537288375	78	0.325978	TRIDC1BG052210.4	Formimidoyltransferase-cyclodeaminase
	IWB71904	Tdurum_contig48523_1838	1B	565285702	1B	553131869	82.2	0.250305	TRIDC1BG054110.1	undescribed protein
	IWB22011	Excalibur_c11980_619	1B	645487211	1B	635051723	120.8	0.386085	TRIDC1BG065590.3	unknown function
	IWB2673	BobWhite_c34125_183	1B	678009872	1B	666703425	155.3	0.26042	TRIDC1BG072540.4	F-box family protein
	IWB5439	BobWhite_rep_c64068_241	2A	754830326	2B	763327538		0.296493	TRIDC2AG077900.2	Pentatricopeptide repeat-containing protein
	IWB72990	Tdurum_contig64563_491	2B	24070748	2B	28593411	27	0.257364	TRIDC2BG005360.12	Cyclopropane-fatty-acyl-phospholipid synthase
	IWB59624	RAC875_c61801_299	2B	69430000	2B	66725045	48.2	0.260856	TRIDC2BG012020.1	undescribed protein
	IWB56961	RAC875_c34516_316	2B	69798116	2B	66998785	48.4	0.278544	TRIDC2BG012110.6	Heat stress transcription factor A-2b
	IWB52411	Ra_c6700_406	2B	218203577	2B	210326793	89.7	0.282253	TRIDC2BG029920.12	time for coffee
	IWA4853	wsnp_Ex_c8894_14858193	2B	540889203	2B	531925392	109.2	0.317856	TRIDC2BG055230.8	Protein kinase superfamily protein
	IWB45296	Kukri_c4294_371	2B	644994322	2B	637407281	129.8	0.326576	TRIDC2BG066320.11	undescribed protein
	IWA5081	wsnp_Ex_rep_c103064_88104690	2B	749396527	2B	737672958	161.5	0.364942	TRIDC2BG080420.12	DNA polymerase I
	IWB56077	RAC875_c27530_860	2B	773018546	2B	761233427	#N/A	0.332554	TRIDC2BG085010.8	unknown function
	IWB8392	BS00045195_51	3B	168336419	3B	167491923	70.1	0.267115	TRIDC3BG023270.3	GDSL esterase/lipase
	IWB66016	TA005793-0515	3B	480852034	3B	475421856	#N/A	0.320781	TRIDC3BG043880.11	Symplekin
	IWB58035	RAC875_c44365_203	3B	485018726	3B	479274959	85.7	0.381222	TRIDC3BG044320.7	zinc finger protein-related
	IWB49662	Kukri_rep_c114738_144	3B	513598230	3B	507646279	88.2	0.316881	TRIDC3BG046620.2	Pentatricopeptide repeat-containing protein	NADH-GOGAT -3B NADH-Glutamate synthase Tdurum_contig42234_4440 86.6 cM
	IWB10980	BS00077967_51	3B	762118144	3B	758874178	#N/A	0.31402	TRIDC3BG074040.5	undescribed protein
	IWB72808	Tdurum_contig61601_447	3B	762882428	3B	759676914	149.8	0.267686	TRIDC3BG074250.3	Tetraspanin family protein
	IWB70345	Tdurum_contig32277_121	3B	763249039	3B	760119152	149.9	0.37046	TRIDC3BG074320.4	unknown function
	IWB12089	BS00099725_51	4A	609162053	4A	611037329	98.6	0.37867	TRIDC4AG050410.1	Sec14p-like phosphatidylinositol transfer family protein
	IWB22779	Excalibur_c16355_712	4A	697710223	7A	18265287	#N/A	0.261247	TRIDC4AG065750.2	Disease resistance protein RPM1
	IWB7078	BS00022431_51	4B	23524456	4B	23204984	22.5	0.304995	TRIDC4BG005540.18	undescribed protein	PH/ARL/KNS
	IWB55667	RAC875_c24515_602	4B	649525478	4B	649759775	98.9	0.349125	TRIDC4BG059190.5	cyclin-dependent kinase B2;2
	IWB58397	RAC875_c48025_483	4B	668006328	4B	669527499	120	0.358808	TRIDC4BG063220.5	protein kinase family protein
	IWB6696	BS00021660_51	5A	48236097	5A	49401194	43.8	0.254305	TRIDC5AG008020.5	Cysteine-rich receptor-like protein kinase 10	ASN1-5A Asparagine synthetase (Ra_c24707_827 43 cM)
	IWB53637	RAC875_c13_1458	5A	411256193	Un	94721369	57.3	0.323299	TRIDC5AG032990.12	FAR1-related sequence 10
	IWB68679	Tdurum_contig17712_115	5A	531647117	5A	498793979	113.2	0.395988	TRIDC5AG048030.8	unknown function
	IWB66909	Tdurum_contig11060_433	5A	539881645	5A	507220834		0.265046	TRIDC5AG049250.5	LRR receptor-like serine/threonine-protein kinase FLS2	PSY3 Phytoene synthase 3 (BS00077855_51 126.8 cM)
	IWB68150	Tdurum_contig14130_315	5B	9409980	5B	9790752	6.5	0.306553	TRIDC5BG001850.28	ERD (early-responsive to dehydration stress) family protein
	IWA332	wsnp_BE499835B_Ta_2_5	5B	19568504	5B	20749661	16.7	0.295585	TRIDC5BG003290.7	N-carbamoylputrescine amidase	PSY2 Phytoene synthase 2 (Excalibur_c3948_1315 15.8 cM)
	IWB34854	IAAV4252	5B	70871481	5B	65272387	38.6	0.310289	TRIDC5BG009760.18	Basic-leucine zipper (bZIP) transcription factor family protein
	IWB58751	RAC875_c51478_173	5B	91242483	5B	85244483	40.3	0.323113	TRIDC5BG011790.7	FAR1-related sequence 5	ASN1-5B Asparagine synthetase (wsnp_RFL_Contig4574_5416228 42 cM)
	IWB67642	Tdurum_contig12540_72	5B	383373944	5B	368841200	88.2	0.315225	TRIDC5BG034880.8	undescribed protein
	IWB65663	TA003225-1427	5B	383651583	5B	369135680		0.323299	TRIDC5BG034910.6	UBX domain-containing protein 6
	IWB52612	Ra_c73292_443	5B	518614378	5B	511520054	91.2	0.272907	TRIDC5BG052530.7	Topoisomerase II-associated protein PAT1
	IWB11983	BS00097030_51	5B	695485915	5B	684349754	190.9	0.264544	TRIDC5BG080200.5	RPM1 interacting protein 4
	IWB26716	Excalibur_c45952_611	6A	72948484	6A	72455736		0.275131	TRIDC6AG013710.13	Ectonucleoside triphosphate diphosphohydrolase 1
	IWB73296	Tdurum_contig75700_411	6A	598874416	6A	594051014	115.3	0.297803	TRIDC6AG056210.3	SAP-like protein BP-73
	IWB5984	BS00004466_51	6A	599254968	6A	594452165	115.4	0.285489	TRIDC6AG056260.2	Methionine import ATP-binding protein MetN
	IWB2096	BobWhite_c27364_124	6A	615349261	6B	689149063		0.295753	TRIDC6AG060240.4	Putative integral membrane protein conserved region (DUF2404)
	IWB10087	BS00067590_51	6B	76996661	6B	73614135	51.8	0.319339	TRIDC6BG013770.7	unknown function
	IWB68255	Tdurum_contig14559_741	6B	134861197	6B	128479231	58	0.333226	TRIDC6BG019250.11	cellulose synthase-like A3
	IWB36646	Jagger_c555_287	6B	196810876	6B	185909706	#N/A	0.327262	TRIDC6BG026320.4	Nucleoid-associated protein YbaB
	IWB1088	BobWhite_c17750_568	6B	212072767	6B	201058942	71.2	0.262669	TRIDC6BG027580.2	undescribed protein
	IWB25244	Excalibur_c32711_504	6B	613807078	6B	602809053		0.289383	TRIDC6BG057380.5	Protein CPR-5
	IWB10268	BS00068245_51	6B	678192064	6B	672318574	139.2	0.272757	TRIDC6BG067230.17	Protein of unknown function (DUF3741)
	IWB71495	Tdurum_contig44130_228	6B	689232413	5B	65600441		0.321952	TRIDC6BG069400.4	unknown function
	IWB73836	Tdurum_contig92981_1091	6B	694349419	6B	685987968	148.2	0.339274	TRIDC6BG070670.8	NAC domain protein,
	IWB66027	TA005876-0602	6B	698233239	6B	690840509	155.9	0.290428	TRIDC6BG071780.3	unknown function
	IWB11727	BS00091701_51	7A	5936485	7A	7504290	#N/A	0.253208	TRIDC7AG002010.1	Protein of unknown function (DUF1218)
	IWB55311	RAC875_c22210_191	7A	7053839	Un	494648110	7	0.280966	TRIDC7AG002350.13	ATP-dependent RNA helicase eIF4A
	IWB11249	BS00082268_51	7A	12422453	7A	13891374	9.8	0.251201	TRIDC7AG003440.1	Avenin-like b4
	IWB10719	BS00074230_51	7A	77686300	7A	80207448	75.2	0.317856	TRIDC7AG015070.19	C2H2-like zinc finger protein
	IWB27404	Excalibur_c53632_204	7A	571280743	7A	570116898	131.3	0.342616	TRIDC7AG054900.9	Eukaryotic aspartyl protease family protein
	IWA3701	wsnp_Ex_c40011_47158369	7A	574639659	7A	573639375	#N/A	0.258468	TRIDC7AG055400.6	Brefeldin A-inhibited guanine nucleotide-exchange protein 1
	IWA2437	wsnp_Ex_c19582_28564743	7A	605192975	7A	604496174	135.1	0.292428	TRIDC7AG058100.12	Galactokinase
	IWB11000	BS00078324_51	7A	613232278	7A	612336934	137.5	0.281789	TRIDC7AG059110.2	exocyst subunit exo70 family protein G1
	IWB23497	Excalibur_c20486_268	7A	617784289	4A	596199826	138.7	0.254499	TRIDC7AG059660.2	undescribed protein
	IWB23685	Excalibur_c21739_688	7A	658963276	7B	616297909	127.6	0.252537	TRIDC7AG065170.9	tubulin beta chain 2
	IWB36088	IACX5996	7A	722310486	7A	721403394	203.4	0.258444	TRIDC7AG077360.11	Disease resistance protein (CC-NBS-LRR class) family	PSY1 Phytoene synthase 1 (BS00022137_51 203.2 cM)/HD
	IWB70399	Tdurum_contig32954_195	7B	76972238	7B	73024778	45	0.339675	TRIDC7BG010110.4	G-protein-coupled receptor 1
	IWB3531	BobWhite_c46772_564	7B	117123267	7B	112887886	57.6	0.291561	TRIDC7BG014610.2	tRNA (guanine-N-7) methyltransferase
	IWB72147	Tdurum_contig51087_573	7B	124773609	7B	119766333	58.4	0.356823	TRIDC7BG015380.11	dynamin-like 3
	IWB22188	Excalibur_c12996_775	7B	584330256	7B	562533648		0.305282	TRIDC7BG051980.2	exocyst subunit exo70 family protein G1
	IWB4539	BobWhite_c8890_279	7B	658079379	7B	635139683	137.4	0.268512	TRIDC7BG061010.1	LEM3 (ligand-effect modulator 3) family protein / CDC50 family protein
	IWB12175	BS00101408_51	7B	664243649	7B	641361493	138.5	0.260994	TRIDC7BG061840.1	F-box family protein

## Sheet: Table S6
Table S6. Major QTLs detected in flanking region (±6Mb) of the outlier SNPs exceeding the significant threshold of 0.25. SNP name, chromosome on Svevo genomes (Maccaferri et al. 2019) are reported in a row. QTL name abbreviation: biomass (BM), harvester index (HI), fusarium head blight resistance (FBH), heading date (HD), yellow rust (YR), stem rust (SR), spike length (SL), spikelets per spike (S…
SNP name	Chromosome	QTL
wsnp_CAP11_rep_c4157_1965583	3A	BM, HI and FBH
RAC875_c10246_839	3A	HD, YR and SR
wsnp_Ex_rep_c67786_66472676	3A	YR
CAP11_c1022_117	3A	KNS
wsnp_Ex_c20250_29303152	3A	TW
BS00022368_51	3A	TW
BobWhite_c15763_205	3A	YR
GENE-1900_115	3B	KNM
Kukri_c48750_1416	3B	KNM
BS00063034_51	3B	TRN, TW, GY, PA, YR and PH
BS00077967_51	3B	KNS, KWS, TKW, YR and DSB
Tdurum_contig33737_157 marker	4B	TG
Tdurum_contig82378_561	4BS	PH, Rht-B1 gene and pasta-making quality pasta b* and pigment loss
IAAV971	4BS	PH, Rht-B1 gene and pasta-making quality pasta b* and pigment loss
Kukri_c14766_484	7B	RGA, SR and FHB
RAC875_c21489_908	7B	RGA, SR and FHB
